# Supplementary material
Source: PubMed Central journal article supplement (PMC4254203)
Supplement: NIHMS628860-supplement.pdf [file NIHMS628860-supplement.pdf]

## SUPPORTING INFORMATION

# Structure-based design, synthesis and biological testing of etoposide analog epipodophyllotoxin-N-mustard hybrid compounds designed to covalently bind to topoisomerase II and DNA

Faculty of Pharmacy, Apotex Centre, University of Manitoba, 750 McDermot Ave, Winnipeg, Manitoba R3E 0T5, Canada

Arun A. Yadav, Xing Wu, Daywin Patel, Jack C. Yalowich and Brian B. Hasinoff\*

### AUTHOR INFORMATION

\*Corresponding author

Tel: +1 204 474 8325; fax: +1 204 474 7617. E-mail: [B\\_Hasinoff@UManitoba.ca](mailto:B_Hasinoff@UManitoba.ca)

### TABLE OF CONTENTS

|                                                                                         |     |
|-----------------------------------------------------------------------------------------|-----|
| 5-dose testing results of compound <b>5</b> in the NCI-60 human tumor cell line screen  | S2  |
| 5-dose testing results of compound <b>7</b> in the NCI-60 human tumor cell line screen  | S6  |
| 5-dose testing results of compound <b>9</b> in the NCI-60 human tumor cell line screen  | S10 |
| 5-dose testing results of compound <b>13</b> in the NCI-60 human tumor cell line screen | S14 |
| 5-dose testing results of compound <b>17</b> in the NCI-60 human tumor cell line screen | S18 |
| 1-dose testing results of compound <b>19</b> in the NCI-60 human tumor cell line screen | S22 |
| <sup>1</sup> H NMR and <sup>13</sup> C NMR spectra                                      | S23 |

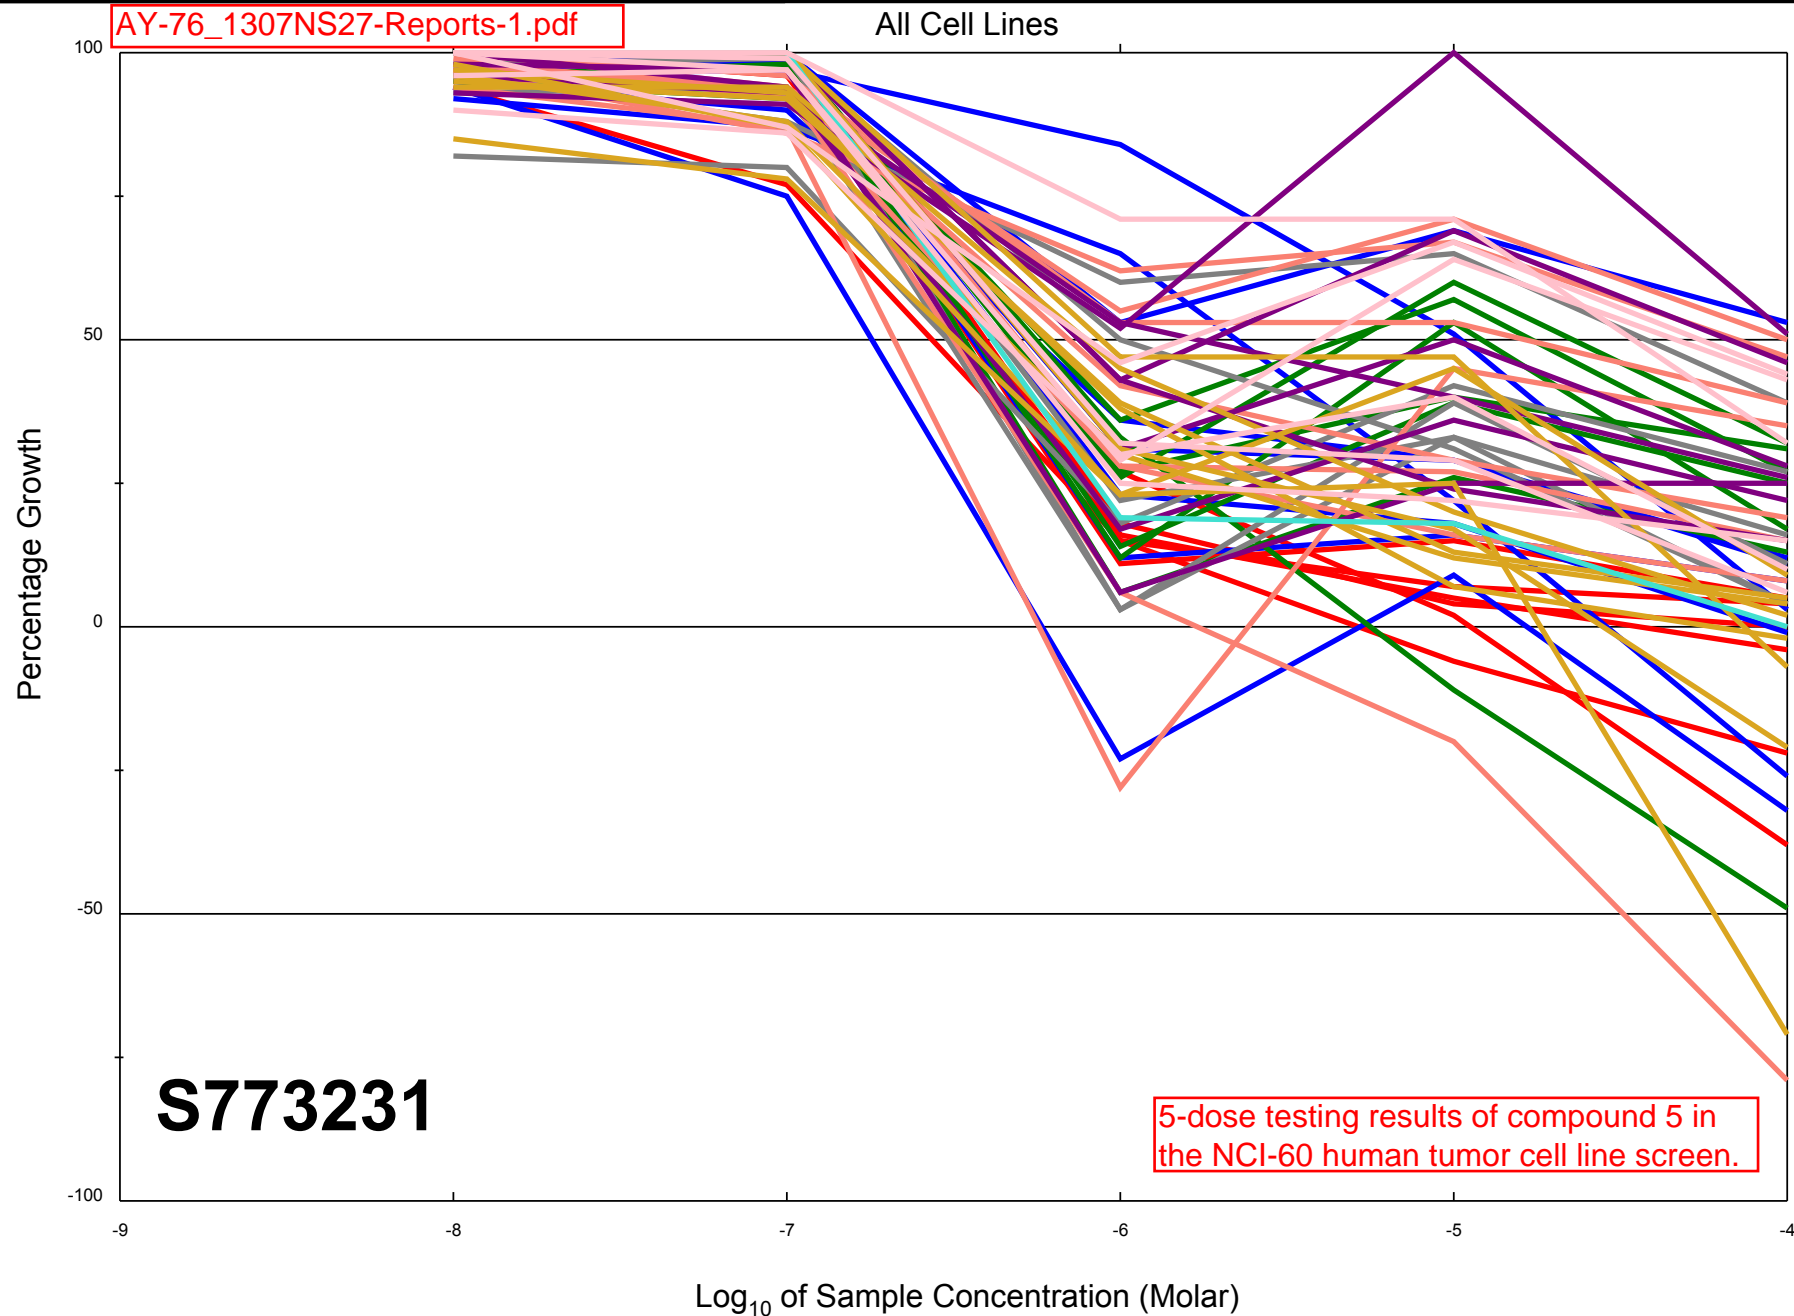

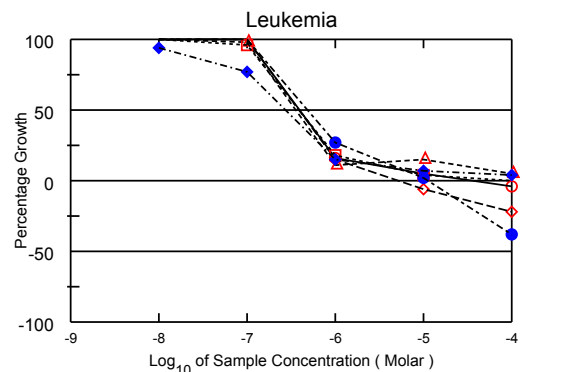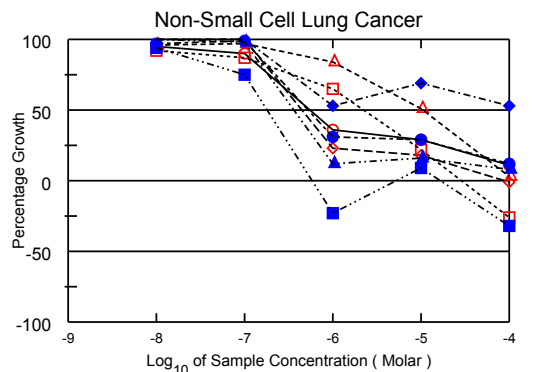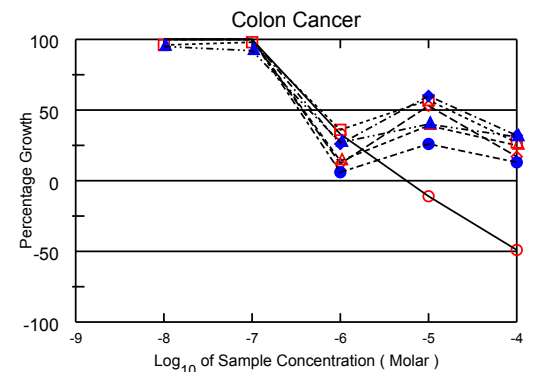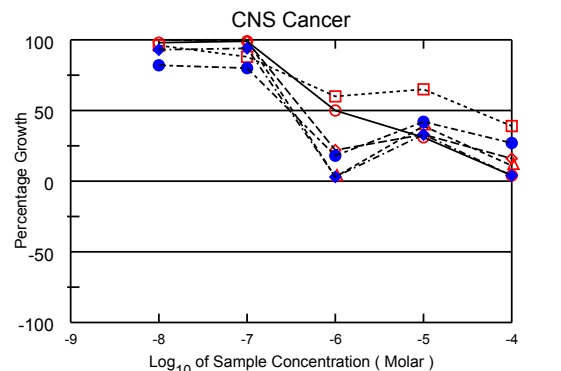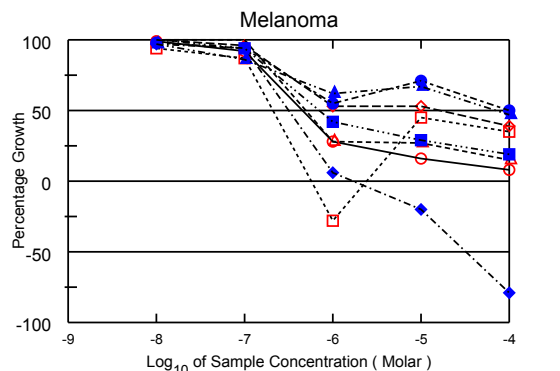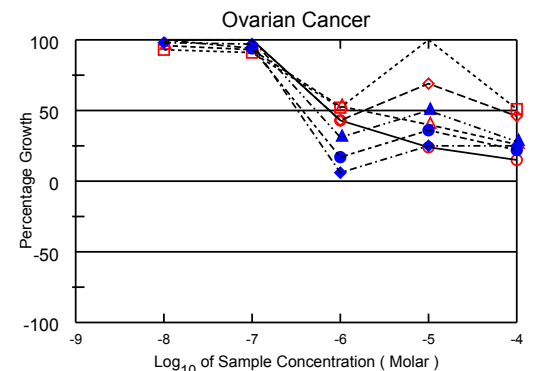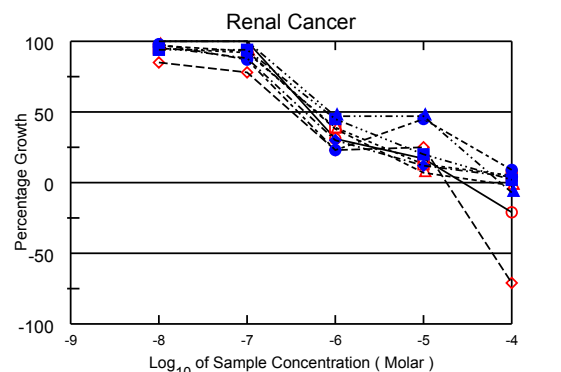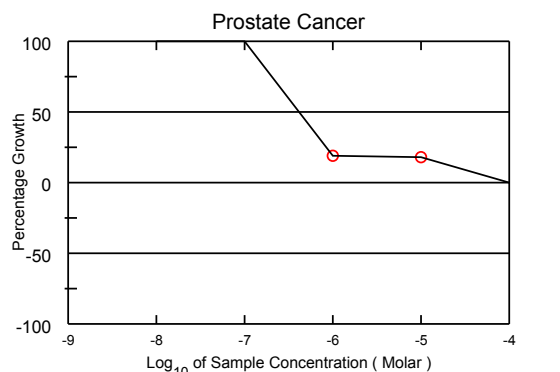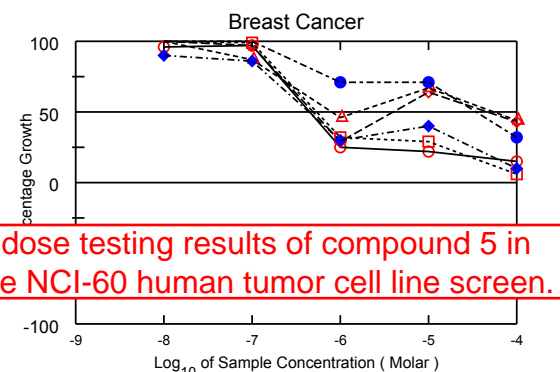

5-dose testing results of compound 5 in the NCI-60 human tumor cell line screen.

## National Cancer Institute Developmental Therapeutics Program In-Vitro Testing Results

|                                  |                                       |                |               |
|----------------------------------|---------------------------------------|----------------|---------------|
| NSC : D - 773231 / 1             | Experiment ID : 1307NS27              | Test Type : 08 | Units : Molar |
| Report Date : September 19, 2013 | Test Date : July 08, 2013             | QNS :          | MC :          |
| COMI : AY-76 (128357)            | Stain Reagent : SRB Dual-Pass Related | SSPL : 0XMP    |               |

| Panel/Cell Line                   | Log10 Concentration |       |                        |       |       |       |       |                |      |      |      |      | GI50      | TGI       | LC50      |
|-----------------------------------|---------------------|-------|------------------------|-------|-------|-------|-------|----------------|------|------|------|------|-----------|-----------|-----------|
|                                   | Time Zero           | Ctrl  | Mean Optical Densities |       |       |       |       | Percent Growth |      |      |      |      |           |           |           |
|                                   |                     |       | -8.0                   | -7.0  | -6.0  | -5.0  | -4.0  | -8.0           | -7.0 | -6.0 | -5.0 | -4.0 |           |           |           |
| <b>Leukemia</b>                   |                     |       |                        |       |       |       |       |                |      |      |      |      |           |           |           |
| CCRF-CEM                          | 0.510               | 2.258 | 2.306                  | 2.254 | 0.795 | 0.592 | 0.489 | 103            | 100  | 16   | 5    | -4   | 3.95E-7   | 3.35E-5   | > 1.00E-4 |
| HL-60(TB)                         | 1.003               | 3.414 | 3.455                  | 3.437 | 1.358 | 0.938 | 0.785 | 102            | 101  | 15   | -6   | -22  | 3.90E-7   | 4.94E-6   | > 1.00E-4 |
| K-562                             | 0.201               | 2.175 | 2.167                  | 2.140 | 0.415 | 0.490 | 0.307 | 100            | 98   | 11   | 15   | 5    | 3.56E-7   | > 1.00E-4 | > 1.00E-4 |
| MOLT-4                            | 0.677               | 2.809 | 2.887                  | 2.732 | 1.066 | 0.756 | 0.688 | 104            | 96   | 18   | 4    | .    | 3.92E-7   | > 1.00E-4 | > 1.00E-4 |
| RPMI-8226                         | 0.757               | 2.212 | 2.310                  | 2.267 | 1.153 | 0.787 | 0.469 | 107            | 104  | 27   | 2    | -38  | 5.04E-7   | 1.12E-5   | > 1.00E-4 |
| SR                                | 0.694               | 2.643 | 2.518                  | 2.194 | 0.983 | 0.824 | 0.765 | 94             | 77   | 15   | 7    | 4    | 2.72E-7   | > 1.00E-4 | > 1.00E-4 |
| <b>Non-Small Cell Lung Cancer</b> |                     |       |                        |       |       |       |       |                |      |      |      |      |           |           |           |
| A549/ATCC                         | 0.325               | 1.568 | 1.501                  | 1.444 | 0.767 | 0.686 | 0.464 | 95             | 90   | 36   | 29   | 11   | 5.42E-7   | > 1.00E-4 | > 1.00E-4 |
| HOP-62                            | 0.354               | 0.991 | 1.020                  | 1.021 | 0.498 | 0.471 | 0.351 | 105            | 105  | 23   | 18   | -1   | 4.64E-7   | 8.89E-5   | > 1.00E-4 |
| HOP-92                            | 1.159               | 1.632 | 1.614                  | 1.618 | 1.558 | 1.398 | 1.172 | 96             | 97   | 84   | 51   | 3    | 1.03E-5   | > 1.00E-4 | > 1.00E-4 |
| NCI-H226                          | 0.795               | 2.104 | 1.998                  | 1.929 | 1.652 | 1.089 | 0.588 | 92             | 87   | 65   | 22   | -26  | 2.29E-6   | 2.90E-5   | > 1.00E-4 |
| NCI-H23                           | 0.686               | 2.118 | 2.075                  | 2.105 | 1.126 | 1.094 | 0.863 | 97             | 99   | 31   | 29   | 12   | 5.23E-7   | > 1.00E-4 | > 1.00E-4 |
| NCI-H322M                         | 0.742               | 1.809 | 1.815                  | 1.845 | 1.307 | 1.483 | 1.312 | 101            | 103  | 53   | 69   | 53   | > 1.00E-4 | > 1.00E-4 | > 1.00E-4 |
| NCI-H460                          | 0.330               | 3.123 | 3.134                  | 3.060 | 0.666 | 0.766 | 0.553 | 100            | 98   | 12   | 16   | 8    | 5.61E-7   | > 1.00E-4 | > 1.00E-4 |
| NCI-H522                          | 0.637               | 1.303 | 1.260                  | 1.138 | 0.491 | 0.694 | 0.436 | 94             | 75   | -23  | 9    | -32  | 1.80E-7   | .         | > 1.00E-4 |
| <b>Colon Cancer</b>               |                     |       |                        |       |       |       |       |                |      |      |      |      |           |           |           |
| COLO 205                          | 0.595               | 2.376 | 2.388                  | 2.402 | 1.179 | 0.528 | 0.305 | 101            | 101  | 33   | -11  | -49  | 5.62E-7   | 5.53E-6   | > 1.00E-4 |
| HCC-2998                          | 0.521               | 2.026 | 2.025                  | 2.038 | 0.695 | 1.315 | 0.781 | 100            | 101  | 12   | 53   | 17   | .         | > 1.00E-4 | > 1.00E-4 |
| HCT-116                           | 0.304               | 2.248 | 2.300                  | 2.397 | 0.569 | 1.062 | 0.799 | 103            | 108  | 14   | 39   | 25   | 4.10E-7   | > 1.00E-4 | > 1.00E-4 |
| HCT-15                            | 0.248               | 1.749 | 1.694                  | 1.713 | 0.787 | 1.107 | 0.655 | 96             | 98   | 36   | 57   | 27   | .         | > 1.00E-4 | > 1.00E-4 |
| HT29                              | 0.248               | 1.256 | 1.263                  | 1.279 | 0.304 | 0.514 | 0.380 | 101            | 102  | 6    | 26   | 13   | 3.47E-7   | > 1.00E-4 | > 1.00E-4 |
| KM12                              | 0.589               | 2.698 | 2.711                  | 2.790 | 1.139 | 1.844 | 1.274 | 101            | 104  | 26   | 60   | 32   | .         | > 1.00E-4 | > 1.00E-4 |
| SW-620                            | 0.282               | 2.307 | 2.207                  | 2.152 | 0.821 | 1.086 | 0.901 | 95             | 92   | 27   | 40   | 31   | 4.41E-7   | > 1.00E-4 | > 1.00E-4 |
| <b>CNS Cancer</b>                 |                     |       |                        |       |       |       |       |                |      |      |      |      |           |           |           |
| SF-268                            | 0.910               | 2.469 | 2.434                  | 2.448 | 1.686 | 1.396 | 0.976 | 98             | 99   | 50   | 31   | 4    | 9.88E-7   | > 1.00E-4 | > 1.00E-4 |
| SF-295                            | 0.726               | 2.372 | 2.415                  | 2.354 | 1.089 | 1.267 | 0.984 | 103            | 99   | 22   | 33   | 16   | 4.33E-7   | > 1.00E-4 | > 1.00E-4 |
| SF-539                            | 1.133               | 2.856 | 2.907                  | 2.853 | 1.191 | 1.807 | 1.320 | 103            | 100  | 3    | 39   | 11   | 3.28E-7   | > 1.00E-4 | > 1.00E-4 |
| SNB-19                            | 0.825               | 2.257 | 2.206                  | 2.079 | 1.682 | 1.757 | 1.388 | 96             | 88   | 60   | 65   | 39   | 3.84E-5   | > 1.00E-4 | > 1.00E-4 |
| SNB-75                            | 0.908               | 1.800 | 1.637                  | 1.621 | 1.070 | 1.279 | 1.152 | 82             | 80   | 18   | 42   | 27   | 3.04E-7   | > 1.00E-4 | > 1.00E-4 |
| U251                              | 0.372               | 1.555 | 1.472                  | 1.483 | 0.410 | 0.760 | 0.419 | 93             | 94   | 3    | 33   | 4    | 3.05E-7   | > 1.00E-4 | > 1.00E-4 |
| <b>Melanoma</b>                   |                     |       |                        |       |       |       |       |                |      |      |      |      |           |           |           |
| LOX IMVI                          | 0.358               | 2.446 | 2.425                  | 2.270 | 0.949 | 0.701 | 0.521 | 99             | 92   | 28   | 16   | 8    | 4.54E-7   | > 1.00E-4 | > 1.00E-4 |
| MALME-3M                          | 0.902               | 1.908 | 1.968                  | 1.870 | 1.436 | 1.435 | 1.293 | 106            | 96   | 53   | 53   | 39   | 1.62E-5   | > 1.00E-4 | > 1.00E-4 |
| M14                               | 0.460               | 1.849 | 1.867                  | 1.850 | 0.846 | 0.841 | 0.663 | 101            | 100  | 28   | 27   | 15   | 4.92E-7   | > 1.00E-4 | > 1.00E-4 |
| MDA-MB-435                        | 0.621               | 2.481 | 2.377                  | 2.240 | 0.446 | 1.451 | 1.281 | 94             | 87   | -28  | 45   | 35   | 2.10E-7   | .         | > 1.00E-4 |
| SK-MEL-28                         | 0.549               | 1.801 | 1.774                  | 1.724 | 1.238 | 1.443 | 1.172 | 98             | 94   | 55   | 71   | 50   | 9.73E-5   | > 1.00E-4 | > 1.00E-4 |
| SK-MEL-5                          | 0.725               | 3.118 | 3.056                  | 2.968 | 0.867 | 0.582 | 0.156 | 97             | 94   | 6    | -20  | -79  | 3.15E-7   | 1.70E-6   | 3.27E-5   |
| UACC-257                          | 0.819               | 1.713 | 1.685                  | 1.591 | 1.370 | 1.422 | 1.239 | 97             | 86   | 62   | 67   | 47   | 7.09E-5   | > 1.00E-4 | > 1.00E-4 |
| UACC-62                           | 0.928               | 2.805 | 2.820                  | 2.688 | 1.717 | 1.472 | 1.279 | 101            | 94   | 42   | 29   | 19   | 7.01E-7   | > 1.00E-4 | > 1.00E-4 |
| <b>Ovarian Cancer</b>             |                     |       |                        |       |       |       |       |                |      |      |      |      |           |           |           |
| IGROV1                            | 0.717               | 2.099 | 2.240                  | 2.235 | 1.312 | 1.052 | 0.931 | 110            | 110  | 43   | 24   | 15   | 7.86E-7   | > 1.00E-4 | > 1.00E-4 |
| OVCAR-3                           | 0.685               | 1.901 | 1.985                  | 2.000 | 1.206 | 1.520 | 1.239 | 107            | 108  | 43   | 69   | 46   | .         | > 1.00E-4 | > 1.00E-4 |
| OVCAR-4                           | 0.721               | 1.434 | 1.403                  | 1.386 | 1.098 | 1.010 | 0.906 | 96             | 93   | 53   | 40   | 26   | 1.69E-6   | > 1.00E-4 | > 1.00E-4 |
| OVCAR-5                           | 0.704               | 1.487 | 1.433                  | 1.418 | 1.111 | 1.532 | 1.103 | 93             | 91   | 52   | 106  | 51   | > 1.00E-4 | > 1.00E-4 | > 1.00E-4 |
| OVCAR-8                           | 0.422               | 1.841 | 1.867                  | 1.753 | 0.658 | 0.928 | 0.736 | 102            | 94   | 17   | 36   | 22   | 3.69E-7   | > 1.00E-4 | > 1.00E-4 |
| NCI/ADR-RES                       | 0.614               | 2.092 | 2.061                  | 2.050 | 0.704 | 0.988 | 0.981 | 98             | 97   | 6    | 25   | 25   | 3.29E-7   | > 1.00E-4 | > 1.00E-4 |
| SK-OV-3                           | 0.807               | 1.994 | 2.042                  | 2.047 | 1.174 | 1.406 | 1.141 | 104            | 104  | 31   | 50   | 28   | .         | > 1.00E-4 | > 1.00E-4 |
| <b>Renal Cancer</b>               |                     |       |                        |       |       |       |       |                |      |      |      |      |           |           |           |
| 786-0                             | 0.909               | 2.655 | 2.728                  | 2.716 | 1.453 | 1.208 | 0.715 | 104            | 103  | 31   | 17   | -21  | 5.49E-7   | 2.79E-5   | > 1.00E-4 |
| A498                              | 1.589               | 2.523 | 2.383                  | 2.315 | 1.808 | 1.821 | 0.469 | 85             | 78   | 23   | 25   | -71  | 3.24E-7   | 1.82E-5   | 6.09E-5   |
| ACHN                              | 0.492               | 2.266 | 2.219                  | 2.150 | 1.168 | 0.617 | 0.481 | 97             | 93   | 38   | 7    | -2   | 6.09E-7   | 5.74E-5   | > 1.00E-4 |
| CAKI-1                            | 0.741               | 2.494 | 2.405                  | 2.359 | 1.433 | 0.964 | 0.825 | 95             | 92   | 39   | 13   | 5    | 6.32E-7   | > 1.00E-4 | > 1.00E-4 |
| RXF 393                           | 1.048               | 1.725 | 1.710                  | 1.638 | 1.202 | 1.355 | 1.108 | 98             | 87   | 23   | 45   | 9    | 3.78E-7   | > 1.00E-4 | > 1.00E-4 |
| SN12C                             | 0.533               | 1.974 | 1.920                  | 1.802 | 0.969 | 0.709 | 0.594 | 96             | 88   | 30   | 12   | 4    | 4.55E-7   | > 1.00E-4 | > 1.00E-4 |
| TK-10                             | 0.647               | 1.360 | 1.426                  | 1.369 | 0.984 | 0.981 | 0.602 | 109            | 101  | 47   | 47   | -7   | 8.89E-7   | 7.40E-5   | > 1.00E-4 |
| UO-31                             | 0.822               | 2.198 | 2.122                  | 2.114 | 1.441 | 1.102 | 0.848 | 94             | 94   | 45   | 20   | 2    | 7.89E-7   | > 1.00E-4 | > 1.00E-4 |
| <b>Prostate Cancer</b>            |                     |       |                        |       |       |       |       |                |      |      |      |      |           |           |           |
| DU-145                            | 0.499               | 1.911 | 2.002                  | 1.998 | 0.774 | 0.748 | 0.504 | 106            | 106  | 19   | 18   | .    | 4.44E-7   | > 1.00E-4 | > 1.00E-4 |
| <b>Breast Cancer</b>              |                     |       |                        |       |       |       |       |                |      |      |      |      |           |           |           |
| MCF7                              | 0.418               | 2.063 | 1.999                  | 2.008 | 0.835 | 0.781 | 0.658 | 96             | 97   | 25   | 22   | 15   | 4.51E-7   | > 1.00E-4 | > 1.00E-4 |
| MDA-MB-231/ATCC                   | 0.593               | 1.465 | 1.473                  | 1.435 | 0.846 | 1.155 | 0.971 | 101            | 97   | 29   | 64   | 43   | .         | > 1.00E-4 | > 1.00E-4 |
| HS 578T                           | 1.412               | 2.666 | 2.691                  | 2.508 | 1.992 | 2.252 | 1.966 | 102            | 87   | 46   | 67   | 44   | .         | > 1.00E-4 | > 1.00E-4 |
| BT-549                            | 1.069               | 2.023 | 2.077                  | 2.013 | 1.376 | 1.349 | 1.125 | 106            | 99   | 32   | 29   | 6    | 5.41E-7   | > 1.00E-4 | > 1.00E-4 |
| T-47D                             | 0.732               | 1.443 | 1.467                  | 1.447 | 1.234 | 1.237 | 0.960 | 103            | 101  | 71   | 71   | 32   | 3.45E-5   | > 1.00E-4 | > 1.00E-4 |
| MDA-MB-468                        | 0.931               | 1.685 | 1.609                  | 1.582 | 1.157 | 1.233 | 1.004 | 90             | 86   | 30   | 40   | 10   | 4.41E-7   | > 1.00E-4 | > 1.00E-4 |

5-dose testing results of compound 5 in the NCI-60 human tumor cell line screen.

Mean Graphs

Report Date :September 19, 2013

Test Date :July 08, 2013

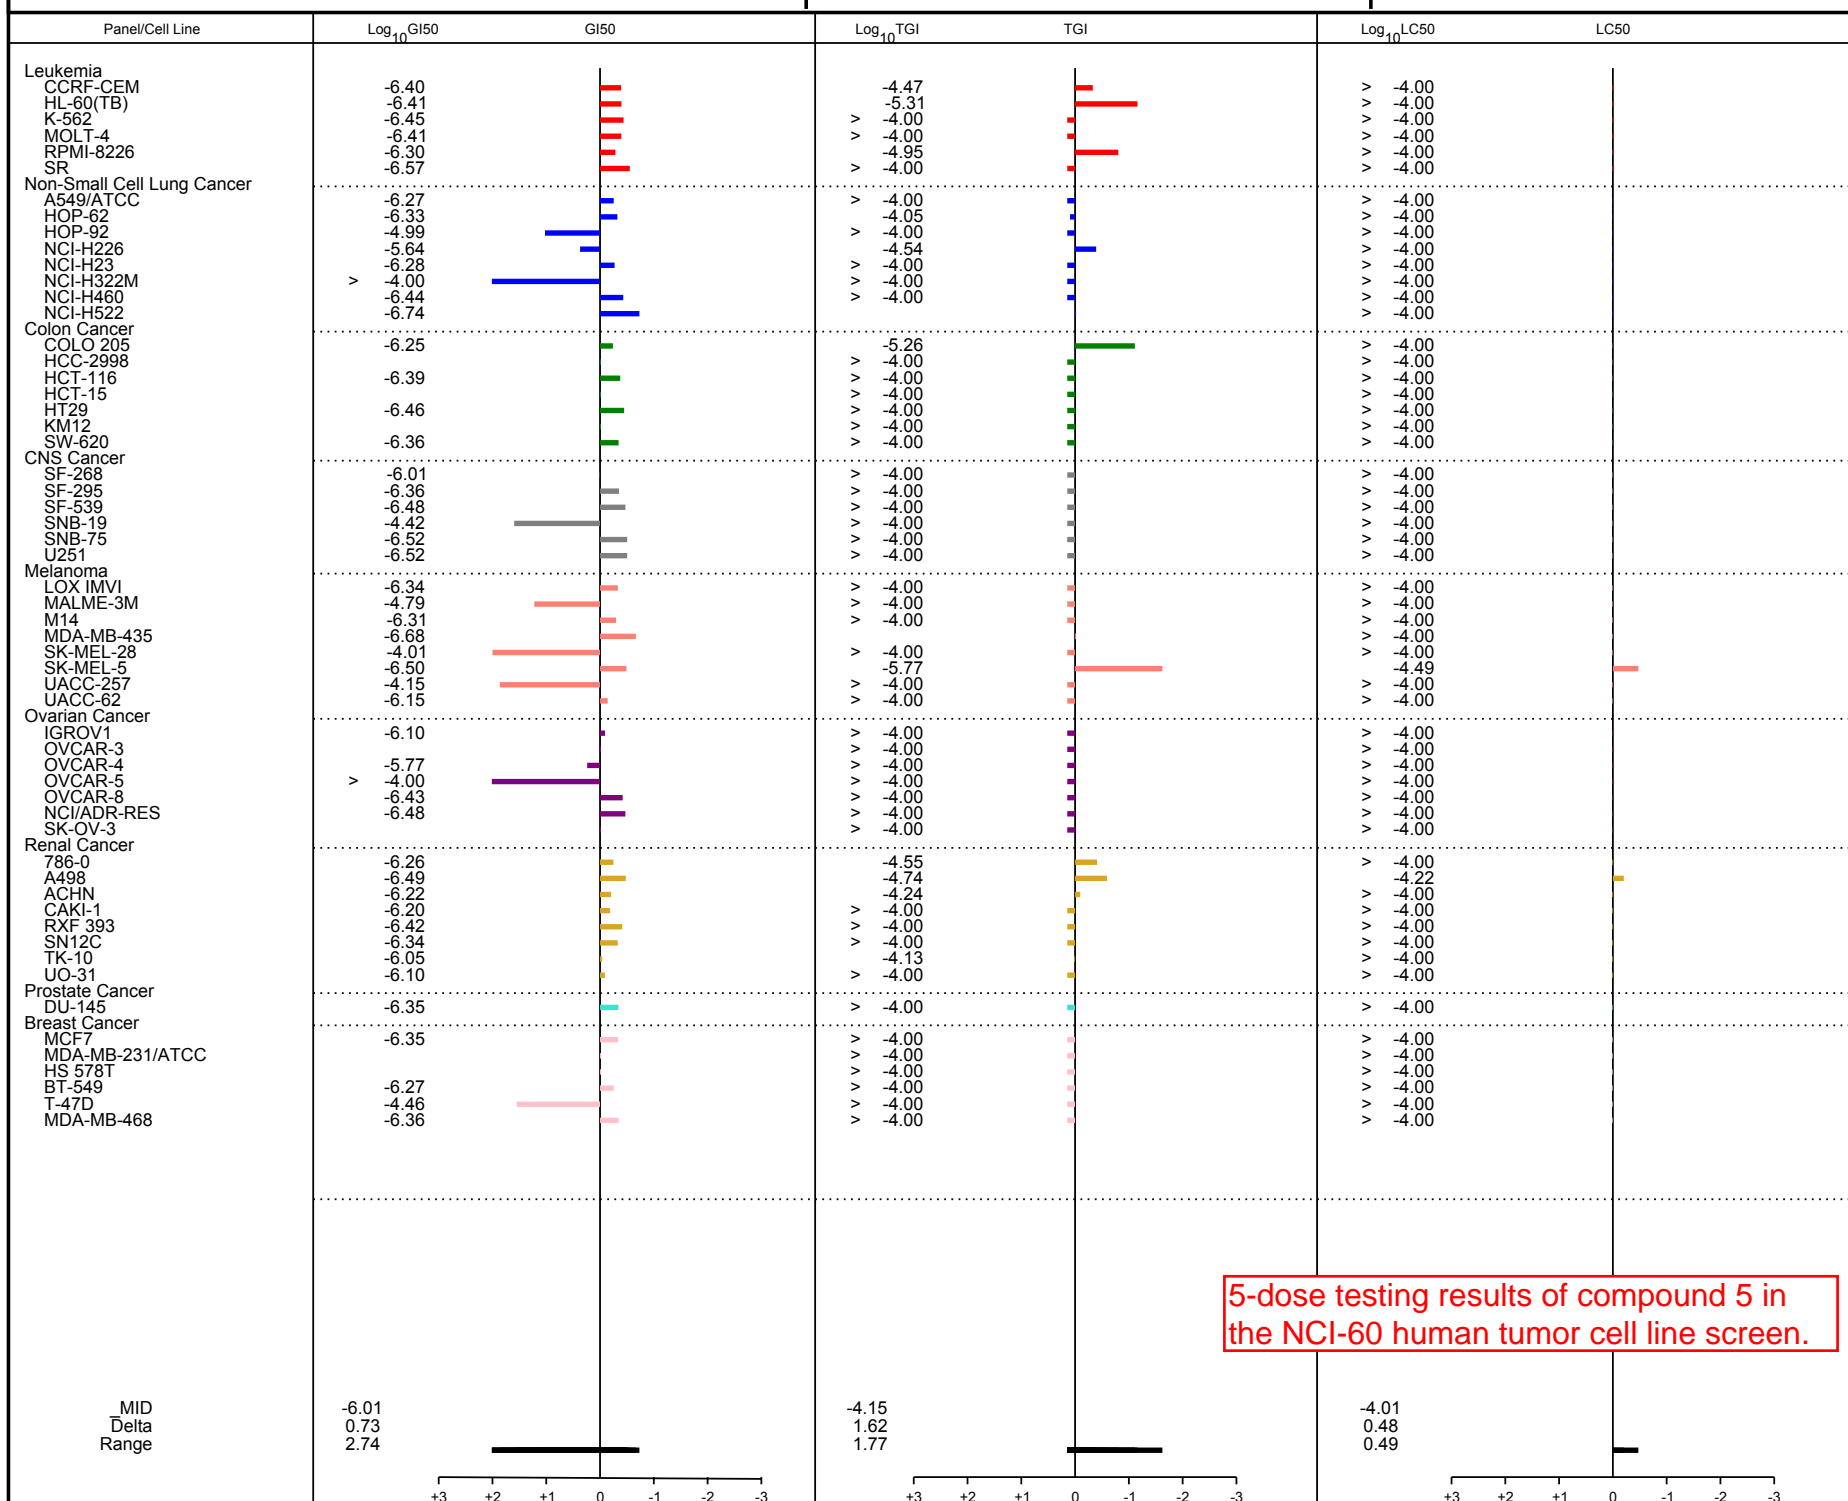

5-dose testing results of compound 5 in the NCI-60 human tumor cell line screen.

AY-54\_chorambucil\_1307NS27-Reports.pdf

All Cell Lines

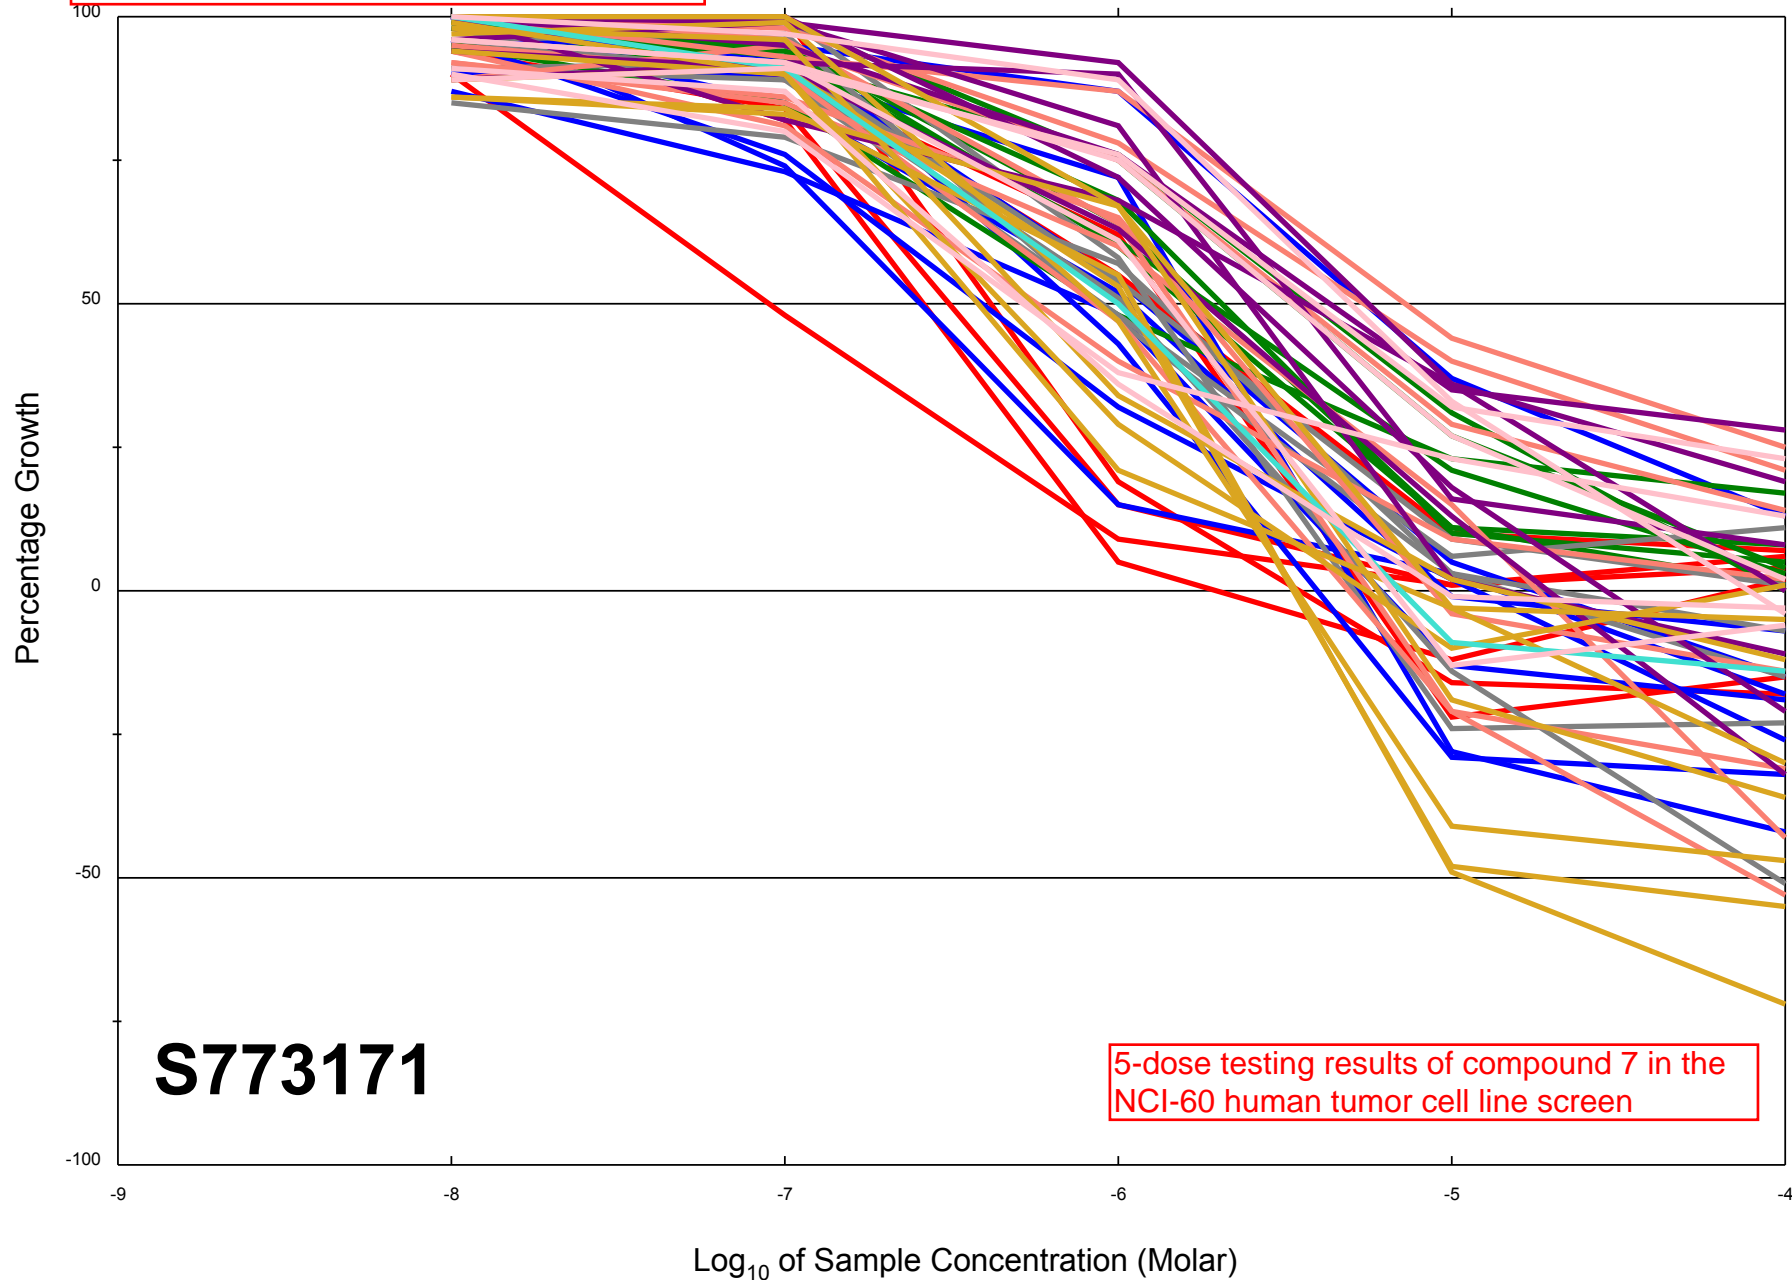

**S773171**

5-dose testing results of compound 7 in the  
NCI-60 human tumor cell line screen

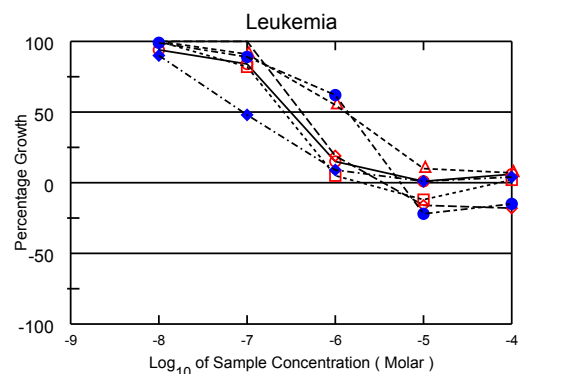

CCRF-CEM —○— HL-60(TB) —◇— K-562 —△—  
MOLT-4 —□— RPMI-8226 —●— SR —◆—

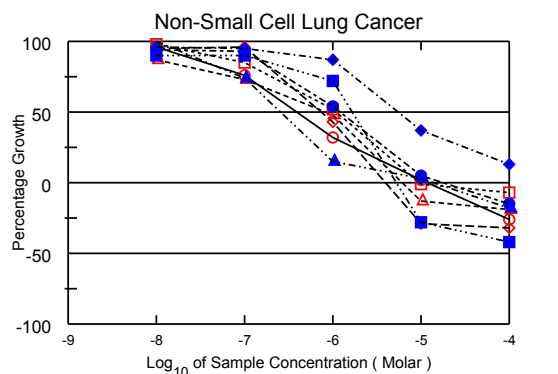

A549/ATCC —○— HOP-62 —◇— HOP-92 —△—  
NCI-H226 —□— NCI-H23 —●— NCI-H322M —◆—  
NCI-H460 —▲— NCI-H522 —■—

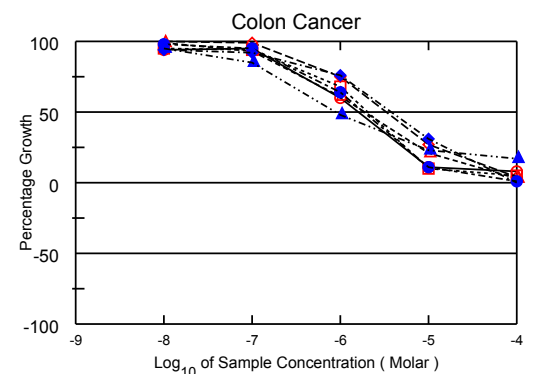

COLO 205 —○— HCC-2998 —◇— HCT-116 —△—  
HCT-15 —□— HT29 —●— KM12 —◆—  
SW-620 —▲—

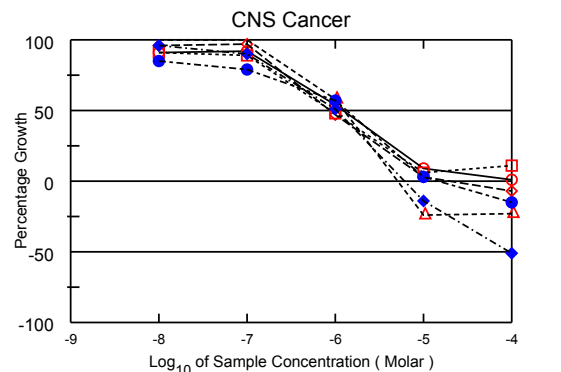

SF-268 —○— SF-295 —◇— SF-539 —△—  
SNB-19 —□— SNB-75 —●— U251 —◆—

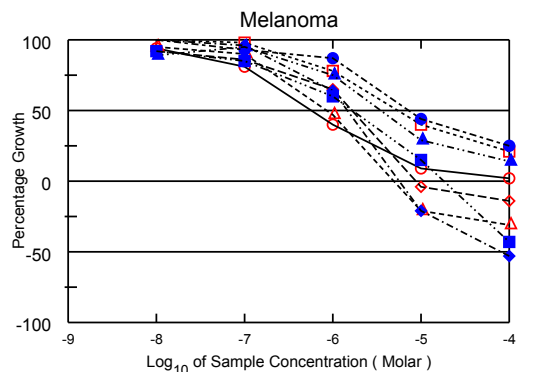

LOX IMVI —○— MALME-3M —◇— M14 —△—  
MDA-MB-435 —□— SK-MEL-28 —●— SK-MEL-5 —◆—  
UACC-257 —▲— UACC-62 —■—

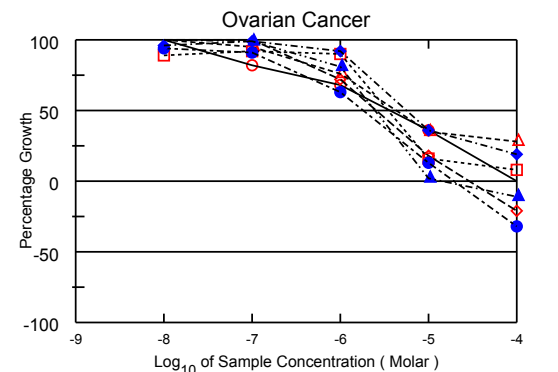

IGROV1 —○— OVCAR-3 —◇— OVCAR-4 —△—  
OVCAR-5 —□— OVCAR-8 —●— NCI/ADR-RES —◆—  
SK-OV-3 —▲—

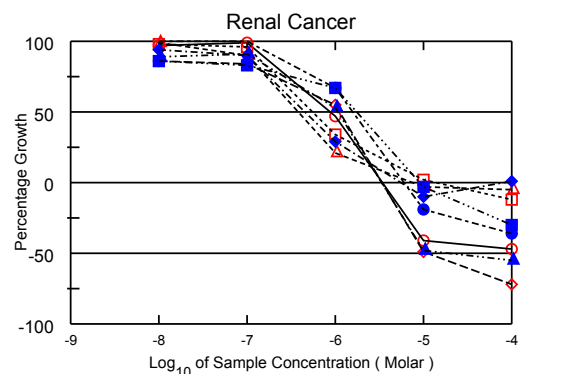

786-0 —○— A498 —◇— ACHN —△—  
CAKI-1 —□— RXF 393 —●— SN12C —◆—  
TK-10 —▲— UO-31 —■—

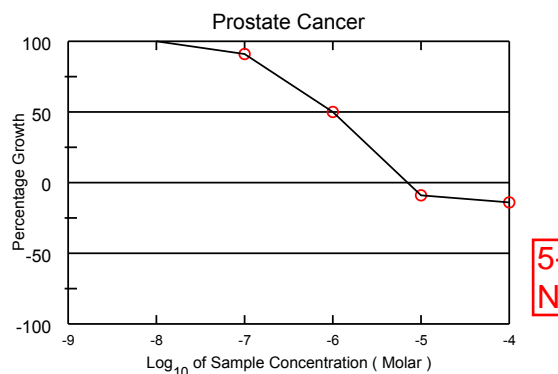

DU-145 —○—

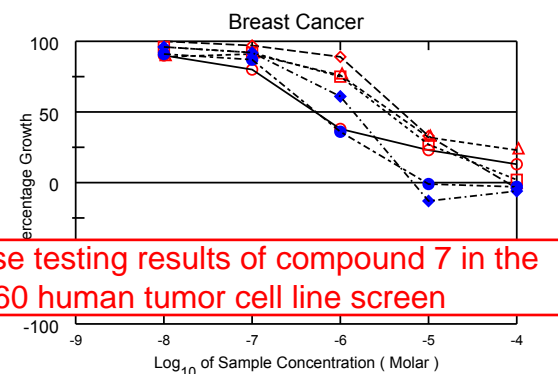

MCF7 —○— MDA-MB-231 —◇— HS 578T —△—  
BT-549 —□— T-47D —●— MDA-MB-468 —◆—

5-dose testing results of compound 7 in the NCI-60 human tumor cell line screen

## National Cancer Institute Developmental Therapeutics Program In-Vitro Testing Results

|                                    |                                       |                |               |
|------------------------------------|---------------------------------------|----------------|---------------|
| NSC : D - 773171 / 1               | Experiment ID : 1307NS27              | Test Type : 08 | Units : Molar |
| Report Date : September 19, 2013   | Test Date : July 08, 2013             | QNS :          | MC :          |
| COMI : AY-54-chlorambucil (127849) | Stain Reagent : SRB Dual-Pass Related | SSPL : 0XMP    |               |

| Panel/Cell Line                   | Log10 Concentration |       |       |       |       |       |       |      |      |      |      |      | GI50    | TGI       | LC50      |
|-----------------------------------|---------------------|-------|-------|-------|-------|-------|-------|------|------|------|------|------|---------|-----------|-----------|
|                                   | Time Zero           | Ctrl  | -8.0  | -7.0  | -6.0  | -5.0  | -4.0  | -8.0 | -7.0 | -6.0 | -5.0 | -4.0 |         |           |           |
| <b>Leukemia</b>                   |                     |       |       |       |       |       |       |      |      |      |      |      |         |           |           |
| CCRF-CEM                          | 0.510               | 2.242 | 2.137 | 1.965 | 0.774 | 0.522 | 0.613 | 94   | 84   | 15   | 1    | 6    | 3.12E-7 | > 1.00E-4 | > 1.00E-4 |
| HL-60(TB)                         | 1.003               | 3.415 | 3.469 | 3.416 | 1.468 | 0.841 | 0.819 | 102  | 100  | 19   | -16  | -18  | 4.16E-7 | 3.50E-6   | > 1.00E-4 |
| K-562                             | 0.201               | 2.254 | 2.262 | 2.069 | 1.332 | 0.411 | 0.336 | 100  | 91   | 55   | 10   | 7    | 1.30E-6 | > 1.00E-4 | > 1.00E-4 |
| MOLT-4                            | 0.677               | 2.831 | 2.837 | 2.436 | 0.782 | 0.595 | 0.726 | 100  | 82   | 5    | -12  | 2    | 2.58E-7 | .         | > 1.00E-4 |
| RPMI-8226                         | 0.757               | 2.278 | 2.262 | 2.112 | 1.697 | 0.594 | 0.644 | 99   | 89   | 62   | -22  | -15  | 1.39E-6 | 5.52E-6   | > 1.00E-4 |
| SR                                | 0.694               | 2.640 | 2.437 | 1.624 | 0.870 | 0.719 | 0.764 | 90   | 48   | 9    | 1    | 4    | 8.85E-8 | > 1.00E-4 | > 1.00E-4 |
| <b>Non-Small Cell Lung Cancer</b> |                     |       |       |       |       |       |       |      |      |      |      |      |         |           |           |
| A549/ATCC                         | 0.325               | 1.558 | 1.503 | 1.262 | 0.715 | 0.352 | 0.240 | 96   | 76   | 32   | 2    | -26  | 3.85E-7 | 1.19E-5   | > 1.00E-4 |
| HOP-62                            | 0.354               | 0.973 | 0.942 | 0.945 | 0.622 | 0.251 | 0.240 | 95   | 96   | 43   | -29  | -32  | 7.42E-7 | 3.95E-6   | > 1.00E-4 |
| HOP-92                            | 1.159               | 1.598 | 1.541 | 1.480 | 1.370 | 1.012 | 0.944 | 87   | 73   | 48   | -13  | -19  | 8.28E-7 | 6.18E-6   | > 1.00E-4 |
| NCI-H226                          | 0.795               | 2.035 | 2.013 | 1.844 | 1.435 | 0.784 | 0.737 | 98   | 85   | 52   | -1   | -7   | 1.07E-6 | 9.39E-6   | > 1.00E-4 |
| NCI-H23                           | 0.686               | 2.121 | 2.036 | 2.014 | 1.455 | 0.755 | 0.581 | 94   | 93   | 54   | 5    | -15  | 1.19E-6 | 1.73E-5   | > 1.00E-4 |
| NCI-H322M                         | 0.742               | 1.887 | 1.841 | 1.828 | 1.741 | 1.162 | 0.890 | 96   | 95   | 87   | 37   | 13   | 5.45E-6 | > 1.00E-4 | > 1.00E-4 |
| NCI-H460                          | 0.330               | 3.144 | 3.139 | 2.422 | 0.752 | 0.428 | 0.271 | 100  | 74   | 15   | 3    | -18  | 2.57E-7 | 1.45E-5   | > 1.00E-4 |
| NCI-H522                          | 0.637               | 1.371 | 1.295 | 1.296 | 1.164 | 0.457 | 0.370 | 90   | 90   | 72   | -28  | -42  | 1.65E-6 | 5.21E-6   | > 1.00E-4 |
| <b>Colon Cancer</b>               |                     |       |       |       |       |       |       |      |      |      |      |      |         |           |           |
| COLO 205                          | 0.595               | 2.354 | 2.250 | 2.261 | 1.656 | 0.789 | 0.737 | 94   | 95   | 60   | 11   | 8    | 1.62E-6 | > 1.00E-4 | > 1.00E-4 |
| HCC-2998                          | 0.521               | 2.060 | 2.110 | 2.049 | 1.671 | 0.942 | 0.589 | 103  | 99   | 75   | 27   | 4    | 3.32E-6 | > 1.00E-4 | > 1.00E-4 |
| HCT-116                           | 0.304               | 2.262 | 2.247 | 2.120 | 1.507 | 0.723 | 0.353 | 99   | 93   | 61   | 21   | 3    | 1.93E-6 | > 1.00E-4 | > 1.00E-4 |
| HCT-15                            | 0.248               | 1.736 | 1.663 | 1.642 | 1.265 | 0.396 | 0.330 | 95   | 94   | 68   | 10   | 5    | 2.06E-6 | > 1.00E-4 | > 1.00E-4 |
| HT29                              | 0.248               | 1.253 | 1.230 | 1.205 | 0.894 | 0.364 | 0.262 | 98   | 95   | 64   | 11   | 1    | 1.86E-6 | > 1.00E-4 | > 1.00E-4 |
| KM12                              | 0.589               | 2.672 | 2.547 | 2.511 | 2.168 | 1.229 | 0.595 | 94   | 92   | 76   | 31   | .    | 3.74E-6 | > 1.00E-4 | > 1.00E-4 |
| SW-620                            | 0.282               | 2.281 | 2.178 | 1.975 | 1.235 | 0.751 | 0.618 | 95   | 85   | 48   | 23   | 17   | 8.66E-7 | > 1.00E-4 | > 1.00E-4 |
| <b>CNS Cancer</b>                 |                     |       |       |       |       |       |       |      |      |      |      |      |         |           |           |
| SF-268                            | 0.910               | 2.503 | 2.364 | 2.380 | 1.766 | 1.047 | 0.919 | 91   | 92   | 54   | 9    | 1    | 1.21E-6 | > 1.00E-4 | > 1.00E-4 |
| SF-295                            | 0.726               | 2.386 | 2.324 | 2.341 | 1.505 | 0.772 | 0.673 | 96   | 97   | 47   | 3    | -7   | 8.70E-7 | 1.88E-5   | > 1.00E-4 |
| SF-539                            | 1.133               | 2.922 | 2.958 | 2.939 | 2.171 | 0.858 | 0.869 | 102  | 101  | 58   | -24  | -23  | 1.25E-6 | 5.07E-6   | > 1.00E-4 |
| SNB-19                            | 0.825               | 2.202 | 2.079 | 2.056 | 1.485 | 0.911 | 0.975 | 91   | 89   | 48   | 6    | 11   | 8.91E-7 | > 1.00E-4 | > 1.00E-4 |
| SNB-75                            | 0.908               | 1.797 | 1.662 | 1.610 | 1.416 | 0.931 | 0.770 | 85   | 79   | 57   | 3    | -15  | 1.35E-6 | 1.39E-5   | > 1.00E-4 |
| U251                              | 0.372               | 1.517 | 1.471 | 1.405 | 0.959 | 0.321 | 0.184 | 96   | 90   | 51   | -14  | -51  | 1.05E-6 | 6.15E-6   | 9.67E-5   |
| <b>Melanoma</b>                   |                     |       |       |       |       |       |       |      |      |      |      |      |         |           |           |
| LOX IMVI                          | 0.358               | 2.567 | 2.441 | 2.139 | 1.240 | 0.552 | 0.412 | 94   | 81   | 40   | 9    | 2    | 5.65E-7 | > 1.00E-4 | > 1.00E-4 |
| MALME-3M                          | 0.902               | 1.937 | 1.856 | 1.796 | 1.572 | 0.869 | 0.775 | 92   | 86   | 65   | -4   | -14  | 1.64E-6 | 8.84E-6   | > 1.00E-4 |
| M14                               | 0.460               | 1.880 | 1.809 | 1.744 | 1.123 | 0.364 | 0.317 | 95   | 90   | 47   | -21  | -31  | 8.39E-7 | 4.91E-6   | > 1.00E-4 |
| MDA-MB-435                        | 0.621               | 2.448 | 2.457 | 2.405 | 2.041 | 1.355 | 1.011 | 101  | 98   | 78   | 40   | 21   | 5.47E-6 | > 1.00E-4 | > 1.00E-4 |
| SK-MEL-28                         | 0.549               | 1.772 | 1.767 | 1.691 | 1.616 | 1.088 | 0.850 | 100  | 93   | 87   | 44   | 25   | 7.28E-6 | > 1.00E-4 | > 1.00E-4 |
| SK-MEL-5                          | 0.725               | 3.122 | 3.127 | 3.025 | 2.254 | 0.575 | 0.340 | 100  | 96   | 64   | -21  | -53  | 1.46E-6 | 5.69E-6   | 8.02E-5   |
| UACC-257                          | 0.819               | 1.706 | 1.611 | 1.660 | 1.481 | 1.073 | 0.941 | 89   | 95   | 75   | 29   | 14   | 3.42E-6 | > 1.00E-4 | > 1.00E-4 |
| UACC-62                           | 0.928               | 2.813 | 2.660 | 2.533 | 2.054 | 1.213 | 0.531 | 92   | 85   | 60   | 15   | -43  | 1.65E-6 | 1.82E-5   | > 1.00E-4 |
| <b>Ovarian Cancer</b>             |                     |       |       |       |       |       |       |      |      |      |      |      |         |           |           |
| IGROV1                            | 0.717               | 2.121 | 2.138 | 1.872 | 1.671 | 1.219 | 0.719 | 101  | 82   | 68   | 36   | .    | 3.61E-6 | > 1.00E-4 | > 1.00E-4 |
| OVCAR-3                           | 0.685               | 1.874 | 1.948 | 1.988 | 1.540 | 0.904 | 0.539 | 106  | 110  | 72   | 18   | -21  | 2.56E-6 | 2.90E-5   | > 1.00E-4 |
| OVCAR-4                           | 0.721               | 1.436 | 1.457 | 1.398 | 1.264 | 0.974 | 0.925 | 103  | 95   | 76   | 35   | 28   | 4.34E-6 | > 1.00E-4 | > 1.00E-4 |
| OVCAR-5                           | 0.704               | 1.516 | 1.423 | 1.449 | 1.434 | 0.834 | 0.772 | 89   | 92   | 90   | 16   | 8    | 3.46E-6 | > 1.00E-4 | > 1.00E-4 |
| OVCAR-8                           | 0.422               | 1.863 | 1.780 | 1.732 | 1.333 | 0.611 | 0.287 | 94   | 91   | 63   | 13   | -32  | 1.84E-6 | 1.95E-5   | > 1.00E-4 |
| NCI/ADR-RES                       | 0.614               | 2.138 | 2.081 | 2.121 | 2.022 | 1.170 | 0.909 | 96   | 99   | 92   | 36   | 19   | 5.72E-6 | > 1.00E-4 | > 1.00E-4 |
| SK-OV-3                           | 0.807               | 2.009 | 2.037 | 2.001 | 1.783 | 0.834 | 0.715 | 102  | 99   | 81   | 2    | -11  | 2.48E-6 | 1.45E-5   | > 1.00E-4 |
| <b>Renal Cancer</b>               |                     |       |       |       |       |       |       |      |      |      |      |      |         |           |           |
| 786-0                             | 0.909               | 2.722 | 2.665 | 2.697 | 1.770 | 0.536 | 0.478 | 97   | 99   | 47   | -41  | -47  | 8.93E-7 | 3.44E-6   | > 1.00E-4 |
| A498                              | 1.589               | 2.518 | 2.391 | 2.371 | 2.098 | 0.809 | 0.444 | 86   | 84   | 55   | -49  | -72  | 1.11E-6 | 3.37E-6   | 1.10E-5   |
| ACHN                              | 0.492               | 2.133 | 2.121 | 1.964 | 0.833 | 0.476 | 0.466 | 99   | 90   | 21   | -3   | -5   | 3.76E-7 | 7.26E-6   | > 1.00E-4 |
| CAKI-1                            | 0.741               | 2.456 | 2.428 | 2.383 | 1.321 | 0.772 | 0.653 | 98   | 96   | 34   | 2    | -12  | 5.47E-7 | 1.35E-5   | > 1.00E-4 |
| RXF 393                           | 1.048               | 1.727 | 1.739 | 1.726 | 1.504 | 0.845 | 0.675 | 102  | 100  | 67   | -19  | -36  | 1.58E-6 | 5.97E-6   | > 1.00E-4 |
| SN12C                             | 0.533               | 1.916 | 1.836 | 1.772 | 0.940 | 0.482 | 0.547 | 94   | 90   | 29   | -10  | 1    | 4.55E-7 | .         | > 1.00E-4 |
| TK-10                             | 0.647               | 1.365 | 1.288 | 1.301 | 1.026 | 0.335 | 0.291 | 89   | 91   | 53   | -48  | -55  | 1.06E-6 | 3.32E-6   | 1.79E-5   |
| UO-31                             | 0.822               | 2.329 | 2.111 | 2.068 | 1.835 | 0.796 | 0.579 | 86   | 83   | 67   | -3   | -30  | 1.75E-6 | 9.02E-6   | > 1.00E-4 |
| <b>Prostate Cancer</b>            |                     |       |       |       |       |       |       |      |      |      |      |      |         |           |           |
| DU-145                            | 0.499               | 1.905 | 1.915 | 1.783 | 1.204 | 0.453 | 0.427 | 101  | 91   | 50   | -9   | -14  | 1.00E-6 | 6.97E-6   | > 1.00E-4 |
| <b>Breast Cancer</b>              |                     |       |       |       |       |       |       |      |      |      |      |      |         |           |           |
| MCF7                              | 0.418               | 2.079 | 1.920 | 1.754 | 1.045 | 0.795 | 0.641 | 90   | 80   | 38   | 23   | 13   | 5.16E-7 | > 1.00E-4 | > 1.00E-4 |
| MDA-MB-231/ATCC                   | 0.593               | 1.409 | 1.436 | 1.382 | 1.317 | 0.861 | 0.569 | 103  | 97   | 89   | 33   | -4   | 4.93E-6 | 7.73E-5   | > 1.00E-4 |
| HS 578T                           | 1.412               | 2.681 | 2.543 | 2.566 | 2.379 | 1.819 | 1.703 | 89   | 91   | 76   | 32   | 23   | 3.92E-6 | > 1.00E-4 | > 1.00E-4 |
| BT-549                            | 1.069               | 2.116 | 2.072 | 2.031 | 1.857 | 1.349 | 1.088 | 96   | 92   | 75   | 27   | 2    | 3.31E-6 | > 1.00E-4 | > 1.00E-4 |
| T-47D                             | 0.732               | 1.498 | 1.429 | 1.398 | 1.008 | 0.726 | 0.714 | 91   | 87   | 36   | -1   | -3   | 5.31E-7 | 9.50E-6   | > 1.00E-4 |
| MDA-MB-468                        | 0.931               | 1.577 | 1.553 | 1.528 | 1.327 | 0.814 | 0.876 | 96   | 92   | 61   | -13  | -6   | 1.42E-6 | 6.75E-6   | > 1.00E-4 |

5-dose testing results of compound 7 in the  
NCI-60 human tumor cell line screen



Mean Graphs

Report Date :September 19, 2013

Test Date :July 08, 2013

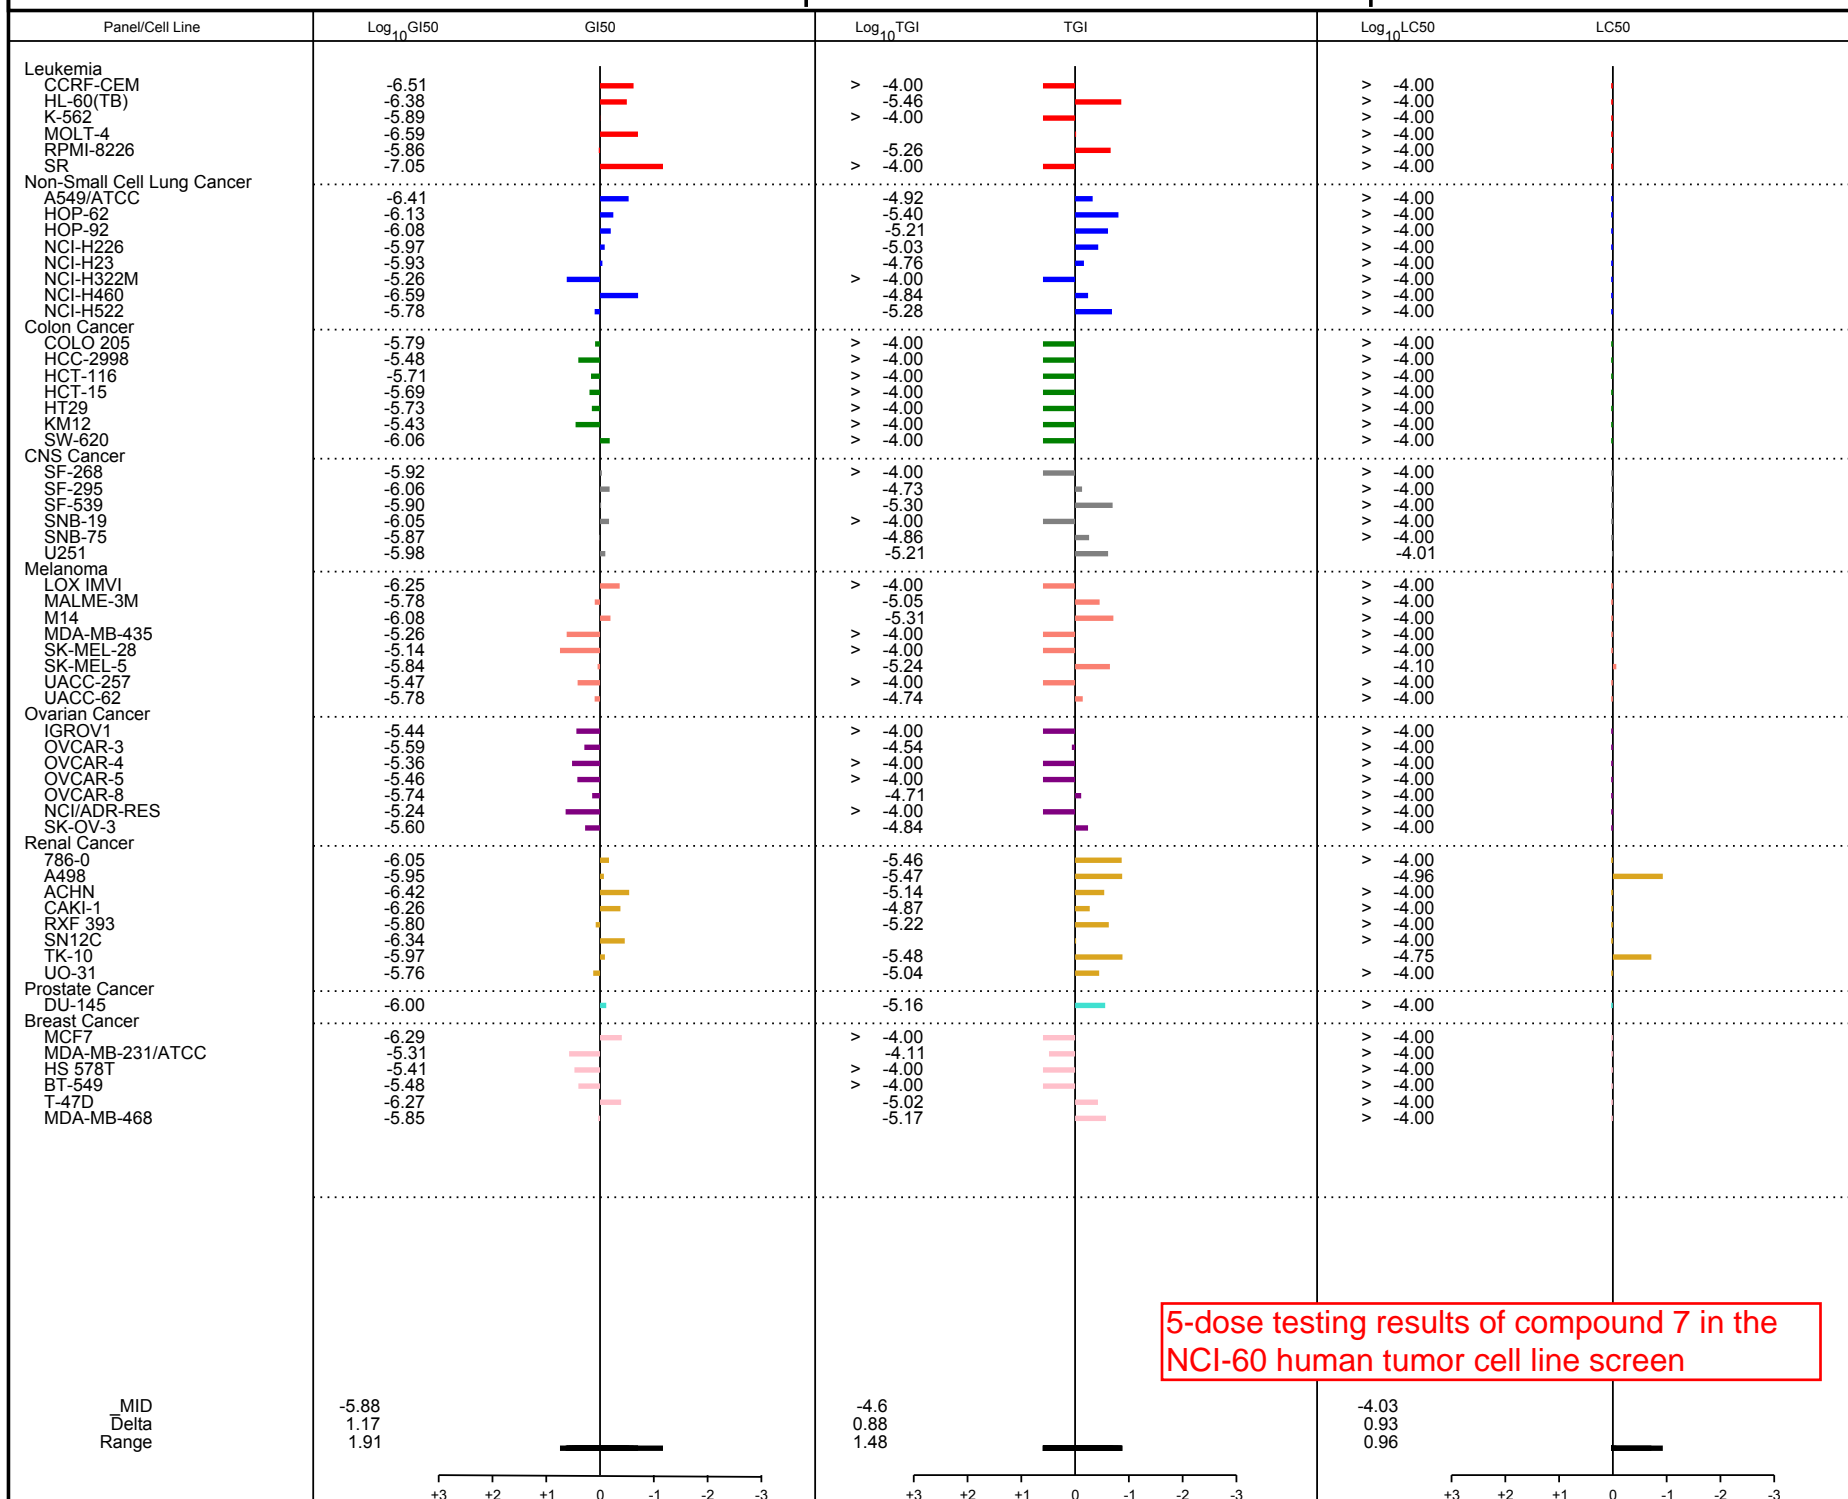

5-dose testing results of compound 7 in the NCI-60 human tumor cell line screen

AY-68-bendamustine\_1307NS30-Reports.pdf

All Cell Lines

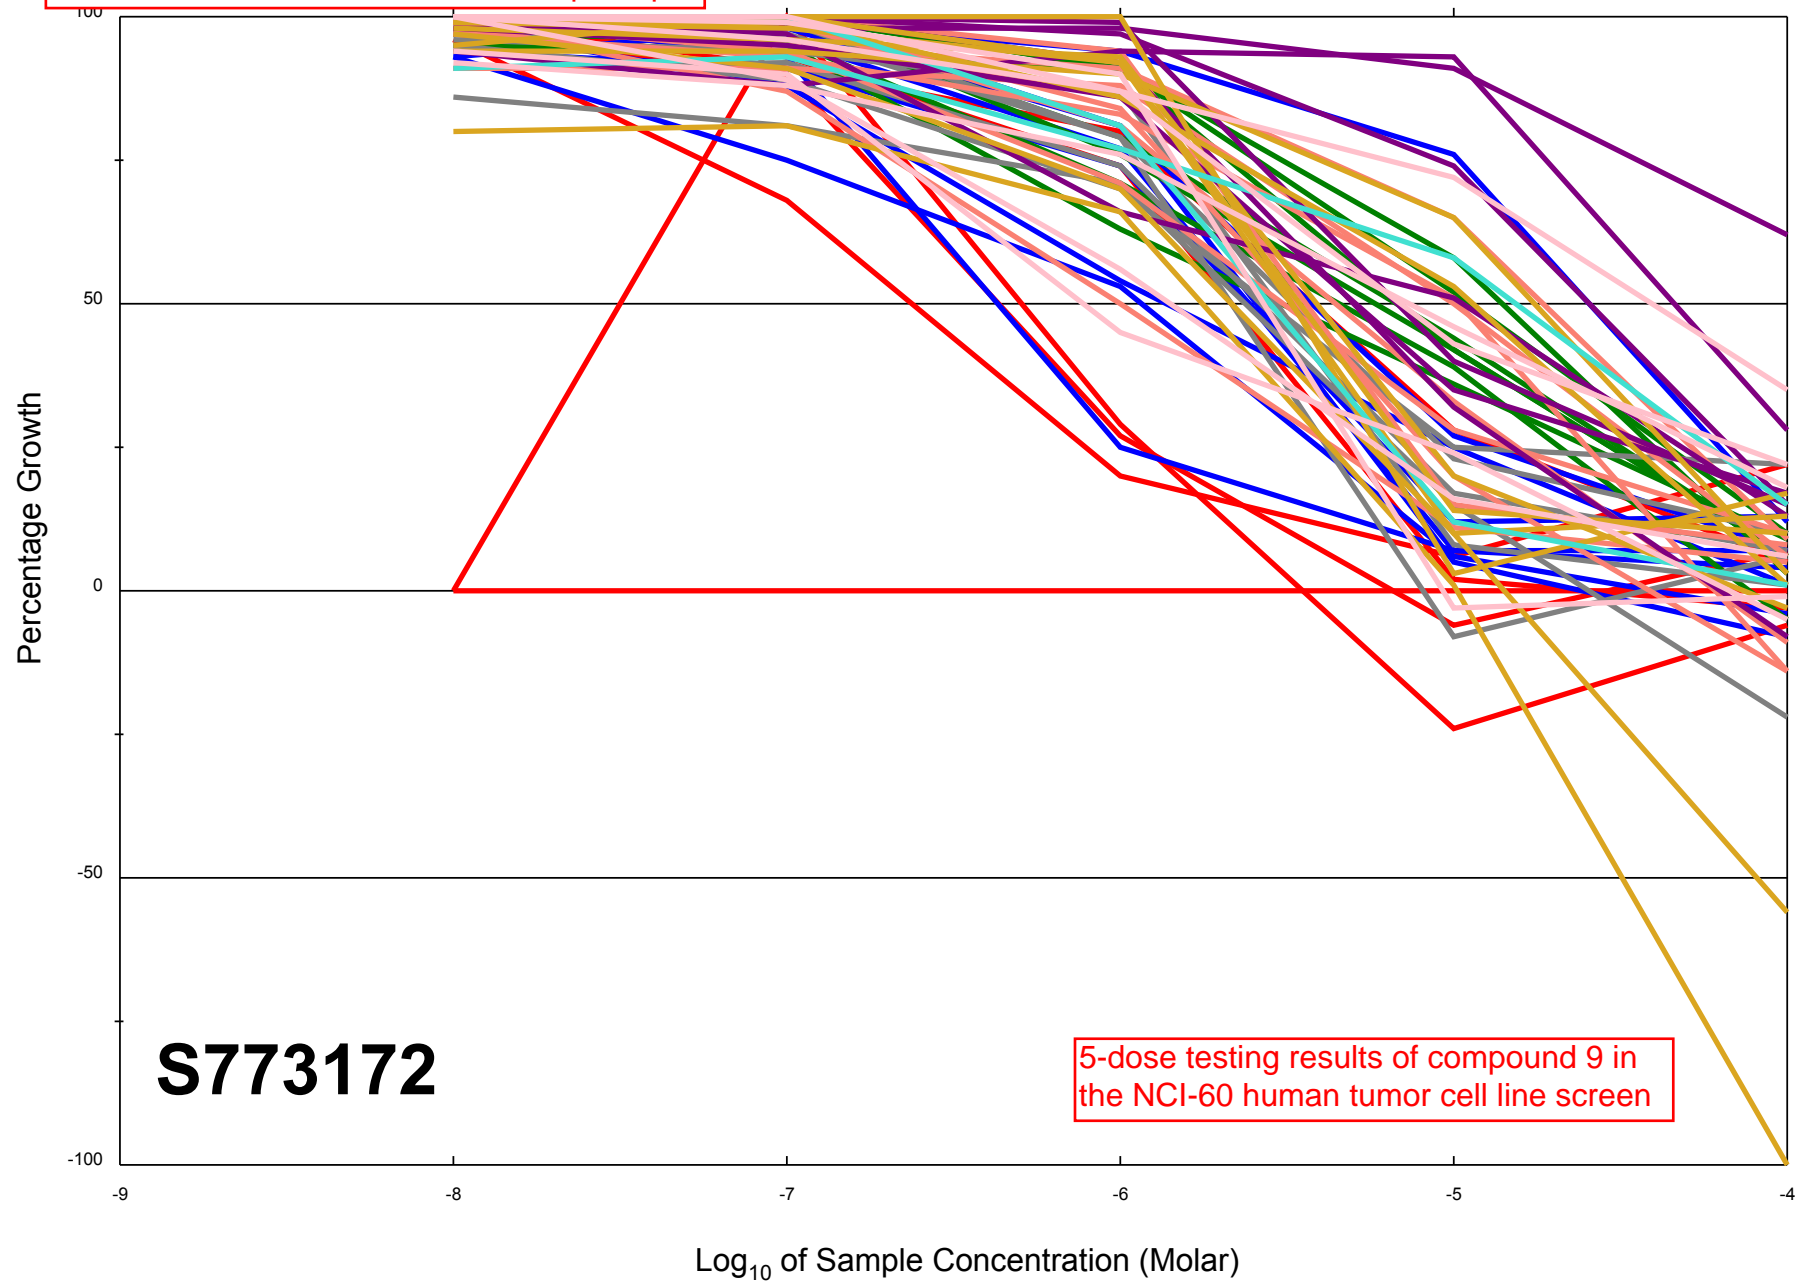

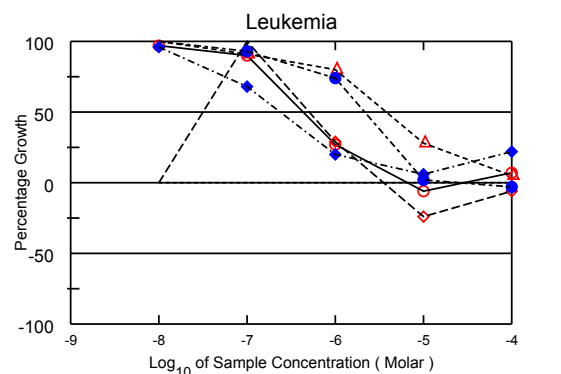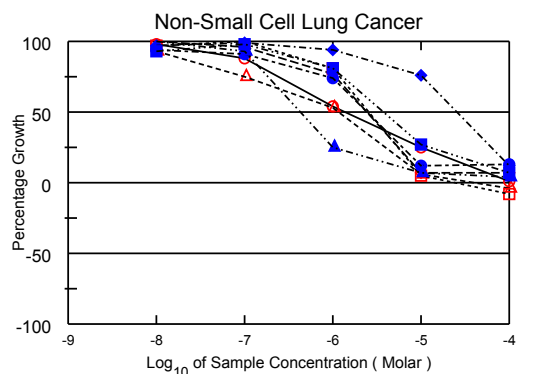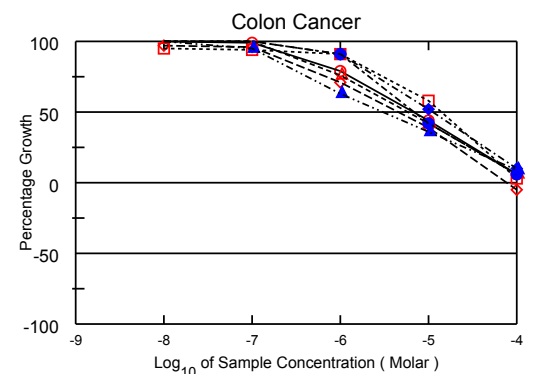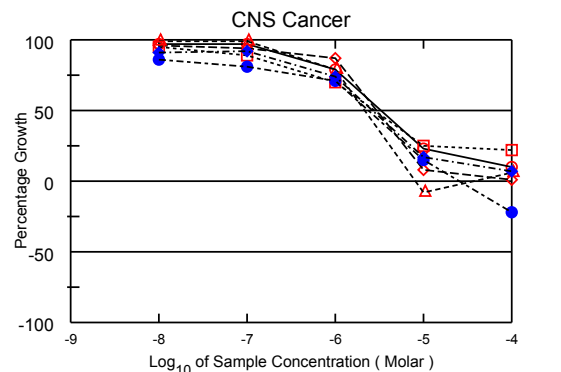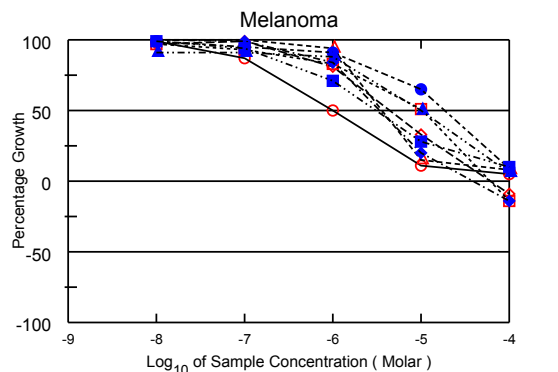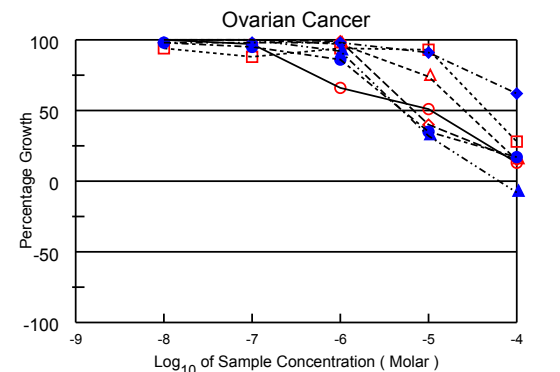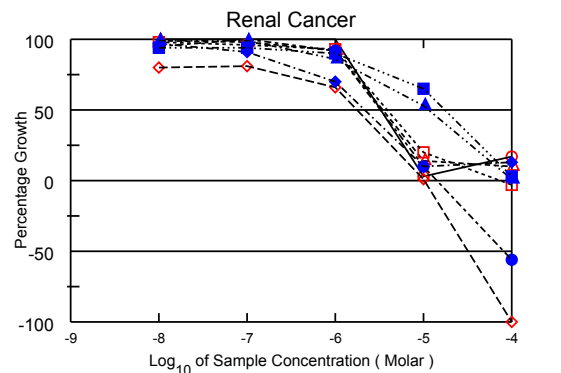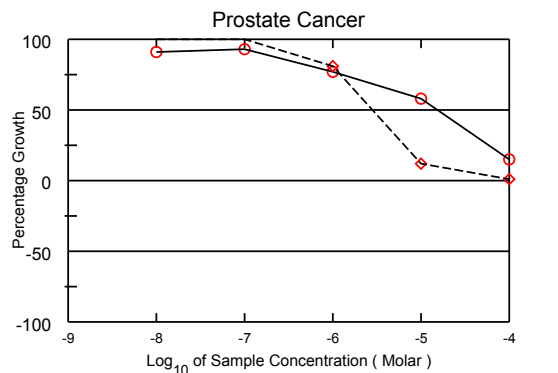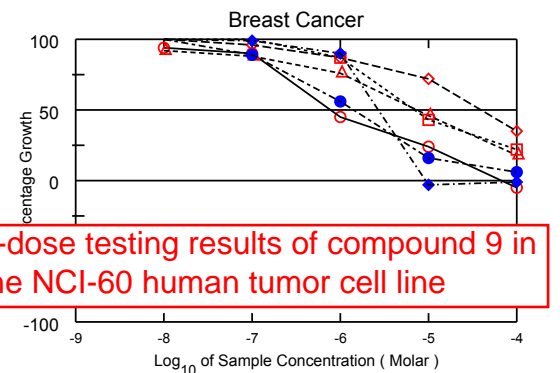

5-dose testing results of compound 9 in the NCI-60 human tumor cell line

## National Cancer Institute Developmental Therapeutics Program In-Vitro Testing Results

|                                    |                                       |                |               |
|------------------------------------|---------------------------------------|----------------|---------------|
| NSC : D - 773172 / 1               | Experiment ID : 1307NS30              | Test Type : 08 | Units : Molar |
| Report Date : September 19, 2013   | Test Date : July 15, 2013             | QNS :          | MC :          |
| COMI : AY-68-bendamustine (127850) | Stain Reagent : SRB Dual-Pass Related | SSPL : 0XMP    |               |

| Panel/Cell Line                   | Time Zero | Log10 Concentration |       |       |       |       |        |      |      |      |      |      | GI50      | TGI       | LC50      |           |
|-----------------------------------|-----------|---------------------|-------|-------|-------|-------|--------|------|------|------|------|------|-----------|-----------|-----------|-----------|
|                                   |           | Ctrl                | -8.0  | -7.0  | -6.0  | -5.0  | -4.0   | -8.0 | -7.0 | -6.0 | -5.0 | -4.0 |           |           |           |           |
| <b>Leukemia</b>                   |           |                     |       |       |       |       |        |      |      |      |      |      |           |           |           |           |
| CCRF-CEM                          | 0.357     | 1.855               | 1.807 | 1.702 | 0.755 | 0.336 | 0.462  | 97   | 90   | 27   | -6   | 7    | 4.26E-7   | .         | .         | > 1.00E-4 |
| HL-60(TB)                         | 0.775     | 1.967               | .     | 2.014 | 1.118 | 0.589 | 0.732  | .    | 104  | 29   | -24  | -6   | 5.22E-7   | 3.51E-6   | .         | > 1.00E-4 |
| K-562                             | 0.261     | 2.311               | 2.405 | 2.122 | 1.909 | 0.829 | 0.371  | 105  | 91   | 80   | 28   | 5    | 3.77E-6   | > 1.00E-4 | > 1.00E-4 |           |
| MOLT-4                            | 0.770     | 2.818               | .     | .     | .     | .     | .      | .    | .    | .    | .    | .    | .         | .         | .         | .         |
| RPMI-8226                         | 0.835     | 2.615               | 2.623 | 2.491 | 2.148 | 0.872 | 0.806  | 100  | 93   | 74   | 2    | -3   | 2.15E-6   | 2.35E-5   | .         | > 1.00E-4 |
| SR                                | 0.258     | 1.079               | 1.047 | 0.814 | 0.420 | 0.311 | 0.441  | 96   | 68   | 20   | 6    | 22   | 2.34E-7   | > 1.00E-4 | > 1.00E-4 |           |
| <b>Non-Small Cell Lung Cancer</b> |           |                     |       |       |       |       |        |      |      |      |      |      |           |           |           |           |
| A549/ATCC                         | 0.375     | 1.878               | 1.843 | 1.704 | 1.190 | 0.745 | 0.389  | 98   | 88   | 54   | 25   | 1    | 1.39E-6   | > 1.00E-4 | > 1.00E-4 |           |
| HOP-62                            | 0.280     | 0.742               | 0.745 | 0.724 | 0.635 | 0.310 | 0.314  | 101  | 96   | 77   | 7    | 7    | 2.41E-6   | > 1.00E-4 | > 1.00E-4 |           |
| HOP-92                            | 1.014     | 1.498               | 1.465 | 1.377 | 1.271 | 1.043 | 0.974  | 93   | 75   | 53   | 6    | -4   | 1.17E-6   | 3.97E-5   | .         | > 1.00E-4 |
| NCI-H226                          | 0.871     | 2.068               | 2.037 | 2.092 | 1.838 | 0.936 | 0.803  | 97   | 102  | 81   | 5    | -8   | 2.56E-6   | 2.57E-5   | .         | > 1.00E-4 |
| NCI-H23                           | 0.737     | 2.287               | 2.199 | 2.147 | 1.890 | 0.929 | 0.946  | 94   | 91   | 74   | 12   | 13   | 2.47E-6   | > 1.00E-4 | > 1.00E-4 |           |
| NCI-H322M                         | 0.530     | 1.605               | 1.576 | 1.594 | 1.546 | 1.343 | 0.654  | 97   | 99   | 94   | 76   | 12   | 2.51E-5   | > 1.00E-4 | > 1.00E-4 |           |
| NCI-H460                          | 0.267     | 2.801               | 2.839 | 2.636 | 0.891 | 0.445 | 0.360  | 102  | 93   | 25   | 7    | 4    | 4.28E-7   | > 1.00E-4 | > 1.00E-4 |           |
| NCI-H522                          | 0.743     | 1.833               | 1.755 | 1.812 | 1.626 | 1.039 | 0.819  | 93   | 98   | 81   | 27   | 7    | 3.76E-6   | > 1.00E-4 | > 1.00E-4 |           |
| <b>Colon Cancer</b>               |           |                     |       |       |       |       |        |      |      |      |      |      |           |           |           |           |
| COLO 205                          | 0.523     | 2.133               | 2.140 | 2.120 | 1.800 | 1.239 | 0.614  | 100  | 99   | 79   | 44   | 6    | 6.94E-6   | > 1.00E-4 | > 1.00E-4 |           |
| HCC-2998                          | 0.960     | 3.072               | 3.007 | 2.986 | 2.458 | 1.789 | 0.913  | 97   | 96   | 71   | 39   | -5   | 4.58E-6   | 7.73E-5   | .         | > 1.00E-4 |
| HCT-116                           | 0.283     | 2.193               | 2.351 | 2.311 | 1.732 | 1.076 | 0.397  | 108  | 106  | 76   | 42   | 6    | 5.66E-6   | > 1.00E-4 | > 1.00E-4 |           |
| HCT-15                            | 0.342     | 2.224               | 2.127 | 2.111 | 2.048 | 1.442 | 0.405  | 95   | 94   | 91   | 58   | 3    | 1.42E-5   | > 1.00E-4 | > 1.00E-4 |           |
| HT29                              | 0.226     | 1.424               | 1.420 | 1.487 | 1.314 | 0.732 | 0.300  | 100  | 105  | 91   | 42   | 6    | 6.91E-6   | > 1.00E-4 | > 1.00E-4 |           |
| KM12                              | 0.573     | 2.808               | 2.881 | 2.867 | 2.611 | 1.734 | 0.795  | 103  | 103  | 91   | 52   | 10   | 1.11E-5   | > 1.00E-4 | > 1.00E-4 |           |
| SW-620                            | 0.386     | 2.747               | 2.756 | 2.624 | 1.872 | 1.231 | 0.599  | 100  | 95   | 63   | 36   | 9    | 2.99E-6   | > 1.00E-4 | > 1.00E-4 |           |
| <b>CNS Cancer</b>                 |           |                     |       |       |       |       |        |      |      |      |      |      |           |           |           |           |
| SF-268                            | 0.734     | 2.205               | 2.166 | 2.158 | 1.903 | 1.073 | 0.885  | 97   | 97   | 79   | 23   | 10   | 3.33E-6   | > 1.00E-4 | > 1.00E-4 |           |
| SF-295                            | 0.677     | 2.091               | 2.028 | 2.002 | 1.911 | 0.796 | 0.693  | 96   | 94   | 87   | 8    | 1    | 2.97E-6   | > 1.00E-4 | > 1.00E-4 |           |
| SF-539                            | 1.065     | 2.837               | 2.819 | 2.826 | 2.464 | 0.985 | 1.179  | 99   | 99   | 79   | -8   | 6    | 2.16E-6   | .         | > 1.00E-4 |           |
| SNB-19                            | 0.790     | 2.178               | 2.109 | 2.021 | 1.762 | 1.132 | 1.099  | 95   | 89   | 70   | 25   | 22   | 2.76E-6   | > 1.00E-4 | > 1.00E-4 |           |
| SNB-75                            | 0.774     | 1.464               | 1.365 | 1.334 | 1.261 | 0.879 | 0.604  | 86   | 81   | 71   | 15   | -22  | 2.36E-6   | 2.57E-5   | .         | > 1.00E-4 |
| U251                              | 0.406     | 1.700               | 1.578 | 1.600 | 1.357 | 0.620 | 0.499  | 91   | 92   | 74   | 17   | 7    | 2.59E-6   | > 1.00E-4 | > 1.00E-4 |           |
| <b>Melanoma</b>                   |           |                     |       |       |       |       |        |      |      |      |      |      |           |           |           |           |
| LOX IMVI                          | 0.305     | 2.223               | 2.198 | 1.965 | 1.265 | 0.510 | 0.408  | 99   | 87   | 50   | 11   | 5    | 1.00E-6   | > 1.00E-4 | > 1.00E-4 |           |
| MALME-3M                          | 0.509     | 1.249               | 1.230 | 1.239 | 1.109 | 0.757 | 0.463  | 97   | 99   | 81   | 33   | -9   | 4.49E-6   | 6.10E-5   | .         | > 1.00E-4 |
| M14                               | 0.578     | 2.334               | 2.370 | 2.351 | 2.233 | 0.835 | 0.715  | 102  | 101  | 94   | 15   | 8    | 3.59E-6   | > 1.00E-4 | > 1.00E-4 |           |
| MDA-MB-435                        | 0.538     | 2.205               | 2.154 | 2.091 | 1.927 | 1.396 | 0.465  | 97   | 93   | 83   | 51   | -14  | 1.05E-5   | 6.17E-5   | .         | > 1.00E-4 |
| SK-MEL-28                         | 0.542     | 1.781               | 1.768 | 1.716 | 1.663 | 1.350 | 0.653  | 99   | 95   | 91   | 65   | 9    | 1.87E-5   | > 1.00E-4 | > 1.00E-4 |           |
| SK-MEL-5                          | 0.757     | 2.650               | 2.682 | 2.638 | 2.350 | 1.136 | 0.649  | 102  | 99   | 84   | 20   | -14  | 3.41E-6   | 3.83E-5   | .         | > 1.00E-4 |
| UACC-257                          | 0.880     | 1.944               | 1.854 | 1.844 | 1.817 | 1.408 | 0.946  | 91   | 91   | 88   | 50   | 6    | 9.75E-6   | > 1.00E-4 | > 1.00E-4 |           |
| UACC-62                           | 0.900     | 2.705               | 2.684 | 2.599 | 2.184 | 1.406 | 1.081  | 99   | 94   | 71   | 28   | 10   | 3.09E-6   | > 1.00E-4 | > 1.00E-4 |           |
| <b>Ovarian Cancer</b>             |           |                     |       |       |       |       |        |      |      |      |      |      |           |           |           |           |
| IGROV1                            | 0.339     | 1.458               | 1.484 | 1.420 | 1.082 | 0.906 | 0.480  | 102  | 97   | 66   | 51   | 13   | 1.04E-5   | > 1.00E-4 | > 1.00E-4 |           |
| OVCAR-3                           | 0.767     | 2.075               | 2.128 | 2.166 | 2.064 | 1.285 | 0.962  | 104  | 107  | 99   | 40   | 15   | 6.69E-6   | > 1.00E-4 | > 1.00E-4 |           |
| OVCAR-4                           | 0.957     | 1.440               | 1.469 | 1.470 | 1.425 | 1.317 | 1.028  | 106  | 106  | 97   | 74   | 15   | 2.56E-5   | > 1.00E-4 | > 1.00E-4 |           |
| OVCAR-5                           | 0.663     | 1.384               | 1.342 | 1.300 | 1.338 | 1.332 | 0.868  | 94   | 88   | 94   | 93   | 28   | 4.62E-5   | > 1.00E-4 | > 1.00E-4 |           |
| OVCAR-8                           | 0.483     | 2.161               | 2.133 | 2.077 | 1.924 | 1.079 | 0.774  | 98   | 95   | 86   | 35   | 17   | 5.15E-6   | > 1.00E-4 | > 1.00E-4 |           |
| NCI/ADR-RES                       | 0.727     | 2.206               | 2.173 | 2.175 | 2.182 | 2.066 | 1.645  | 98   | 98   | 98   | 91   | 62   | > 1.00E-4 | > 1.00E-4 | > 1.00E-4 |           |
| SK-OV-3                           | 0.491     | 1.001               | 1.029 | 1.028 | 0.960 | 0.652 | 0.453  | 106  | 105  | 92   | 32   | -8   | 4.96E-6   | 6.36E-5   | .         | > 1.00E-4 |
| <b>Renal Cancer</b>               |           |                     |       |       |       |       |        |      |      |      |      |      |           |           |           |           |
| 786-0                             | 0.934     | 2.797               | 2.818 | 2.916 | 2.830 | 0.982 | 1.247  | 101  | 106  | 102  | 3    | 17   | 3.32E-6   | > 1.00E-4 | > 1.00E-4 |           |
| A498                              | 1.622     | 2.546               | 2.361 | 2.368 | 2.235 | 1.634 | -0.005 | 80   | 81   | 66   | 1    | -100 | 1.78E-6   | 1.03E-5   | .         | 3.21E-5   |
| ACHN                              | 0.337     | 1.845               | 1.827 | 1.808 | 1.728 | 0.555 | 0.482  | 99   | 98   | 92   | 14   | 10   | 3.49E-6   | > 1.00E-4 | > 1.00E-4 |           |
| CAKI-1                            | 0.684     | 2.443               | 2.402 | 2.367 | 2.323 | 1.031 | 0.666  | 98   | 96   | 93   | 20   | -3   | 3.87E-6   | 7.57E-5   | .         | > 1.00E-4 |
| RXF 393                           | 0.920     | 1.521               | 1.489 | 1.542 | 1.475 | 0.982 | 0.404  | 95   | 103  | 92   | 10   | -56  | 3.28E-6   | 1.43E-5   | .         | 8.10E-5   |
| SN12C                             | 0.746     | 2.558               | 2.502 | 2.402 | 2.014 | 0.929 | 0.979  | 97   | 91   | 70   | 10   | 13   | 2.16E-6   | > 1.00E-4 | > 1.00E-4 |           |
| TK-10                             | 0.742     | 1.768               | 1.758 | 1.762 | 1.622 | 1.284 | 0.749  | 99   | 99   | 86   | 53   | 1    | 1.13E-5   | > 1.00E-4 | > 1.00E-4 |           |
| UO-31                             | 0.533     | 1.960               | 1.875 | 1.872 | 1.814 | 1.467 | 0.574  | 94   | 94   | 90   | 65   | 3    | 1.76E-5   | > 1.00E-4 | > 1.00E-4 |           |
| <b>Prostate Cancer</b>            |           |                     |       |       |       |       |        |      |      |      |      |      |           |           |           |           |
| PC-3                              | 0.537     | 1.485               | 1.398 | 1.415 | 1.263 | 1.085 | 0.675  | 91   | 93   | 77   | 58   | 15   | 1.51E-5   | > 1.00E-4 | > 1.00E-4 |           |
| DU-145                            | 0.390     | 1.560               | 1.651 | 1.627 | 1.332 | 0.536 | 0.405  | 108  | 106  | 81   | 12   | 1    | 2.81E-6   | > 1.00E-4 | > 1.00E-4 |           |
| <b>Breast Cancer</b>              |           |                     |       |       |       |       |        |      |      |      |      |      |           |           |           |           |
| MCF7                              | 0.461     | 2.120               | 2.018 | 1.949 | 1.211 | 0.865 | 0.440  | 94   | 90   | 45   | 24   | -5   | 7.81E-7   | 6.95E-5   | .         | > 1.00E-4 |
| MDA-MB-231/ATCC                   | 0.505     | 1.212               | 1.217 | 1.186 | 1.121 | 1.014 | 0.749  | 101  | 96   | 87   | 72   | 35   | 3.87E-5   | > 1.00E-4 | > 1.00E-4 |           |
| HS 578T                           | 1.186     | 2.364               | 2.271 | 2.220 | 2.084 | 1.733 | 1.395  | 92   | 88   | 76   | 46   | 18   | 7.58E-6   | > 1.00E-4 | > 1.00E-4 |           |
| BT-549                            | 1.186     | 2.141               | 2.171 | 2.187 | 2.019 | 1.595 | 1.401  | 103  | 105  | 87   | 43   | 22   | 6.87E-6   | > 1.00E-4 | > 1.00E-4 |           |
| T-47D                             | 0.584     | 1.370               | 1.372 | 1.280 | 1.026 | 0.707 | 0.629  | 100  | 89   | 56   | 16   | 6    | 1.43E-6   | > 1.00E-4 | > 1.00E-4 |           |
| MDA-MB-468                        | 0.766     | 1.275               | 1.283 | 1.269 | 1.225 | 0.745 | 0.760  | 101  | 99   | 90   | -3   | -1   | 2.70E-6   | 9.33E-6   | .         | > 1.00E-4 |

5-dose testing results of compound 9 in the  
NCI-60 human tumor cell line screen

Mean Graphs

Report Date :September 19, 2013

Test Date :July 15, 2013

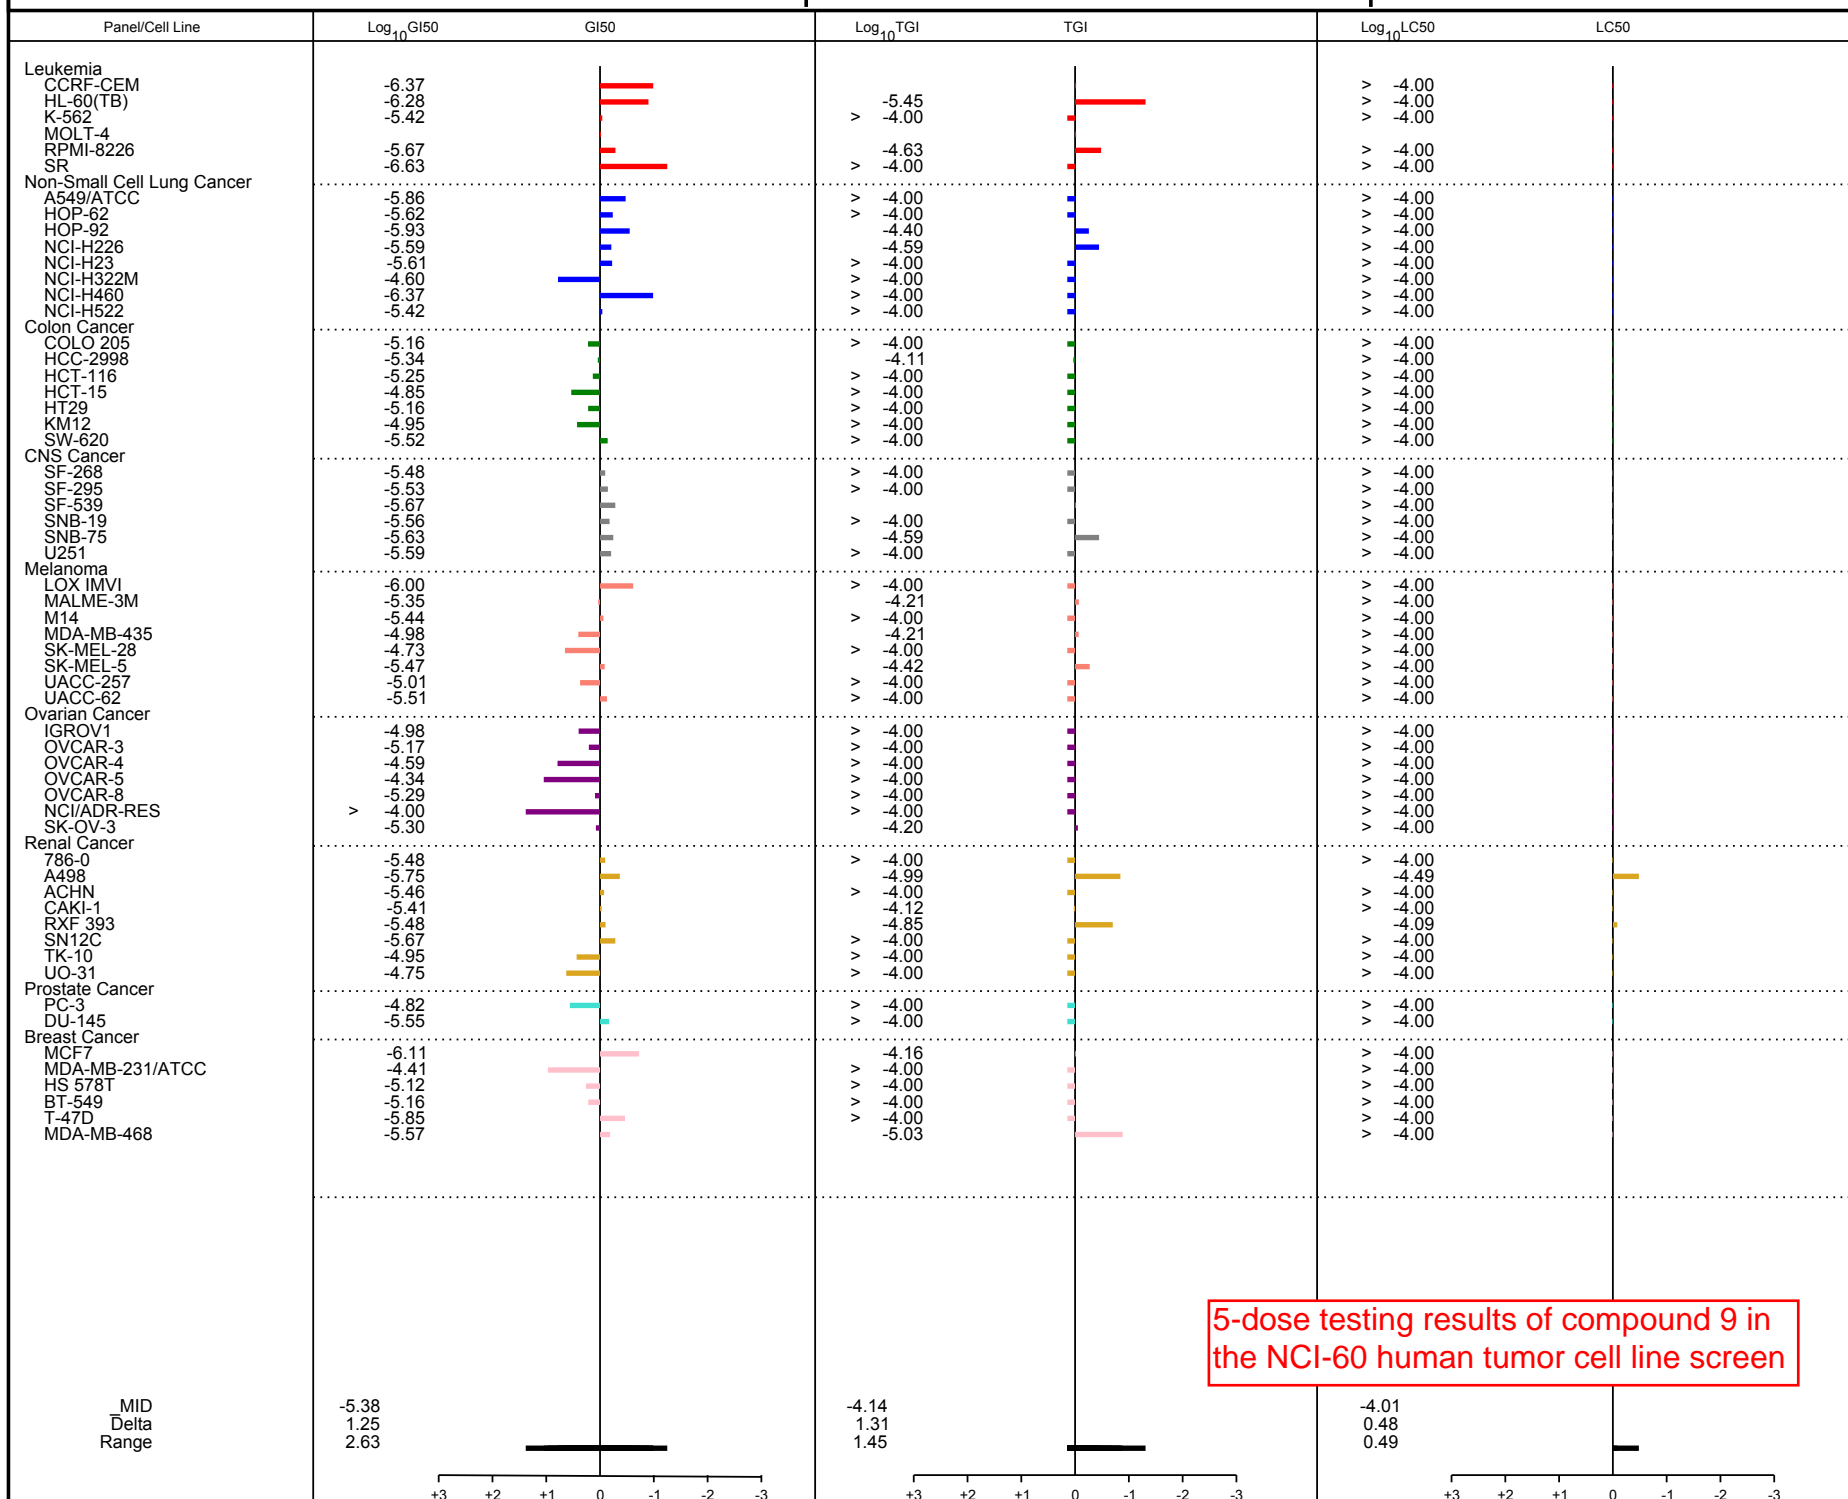

5-dose testing results of compound 9 in the NCI-60 human tumor cell line screen

AY-70-melphalan\_1307NS30-

All Cell Lines

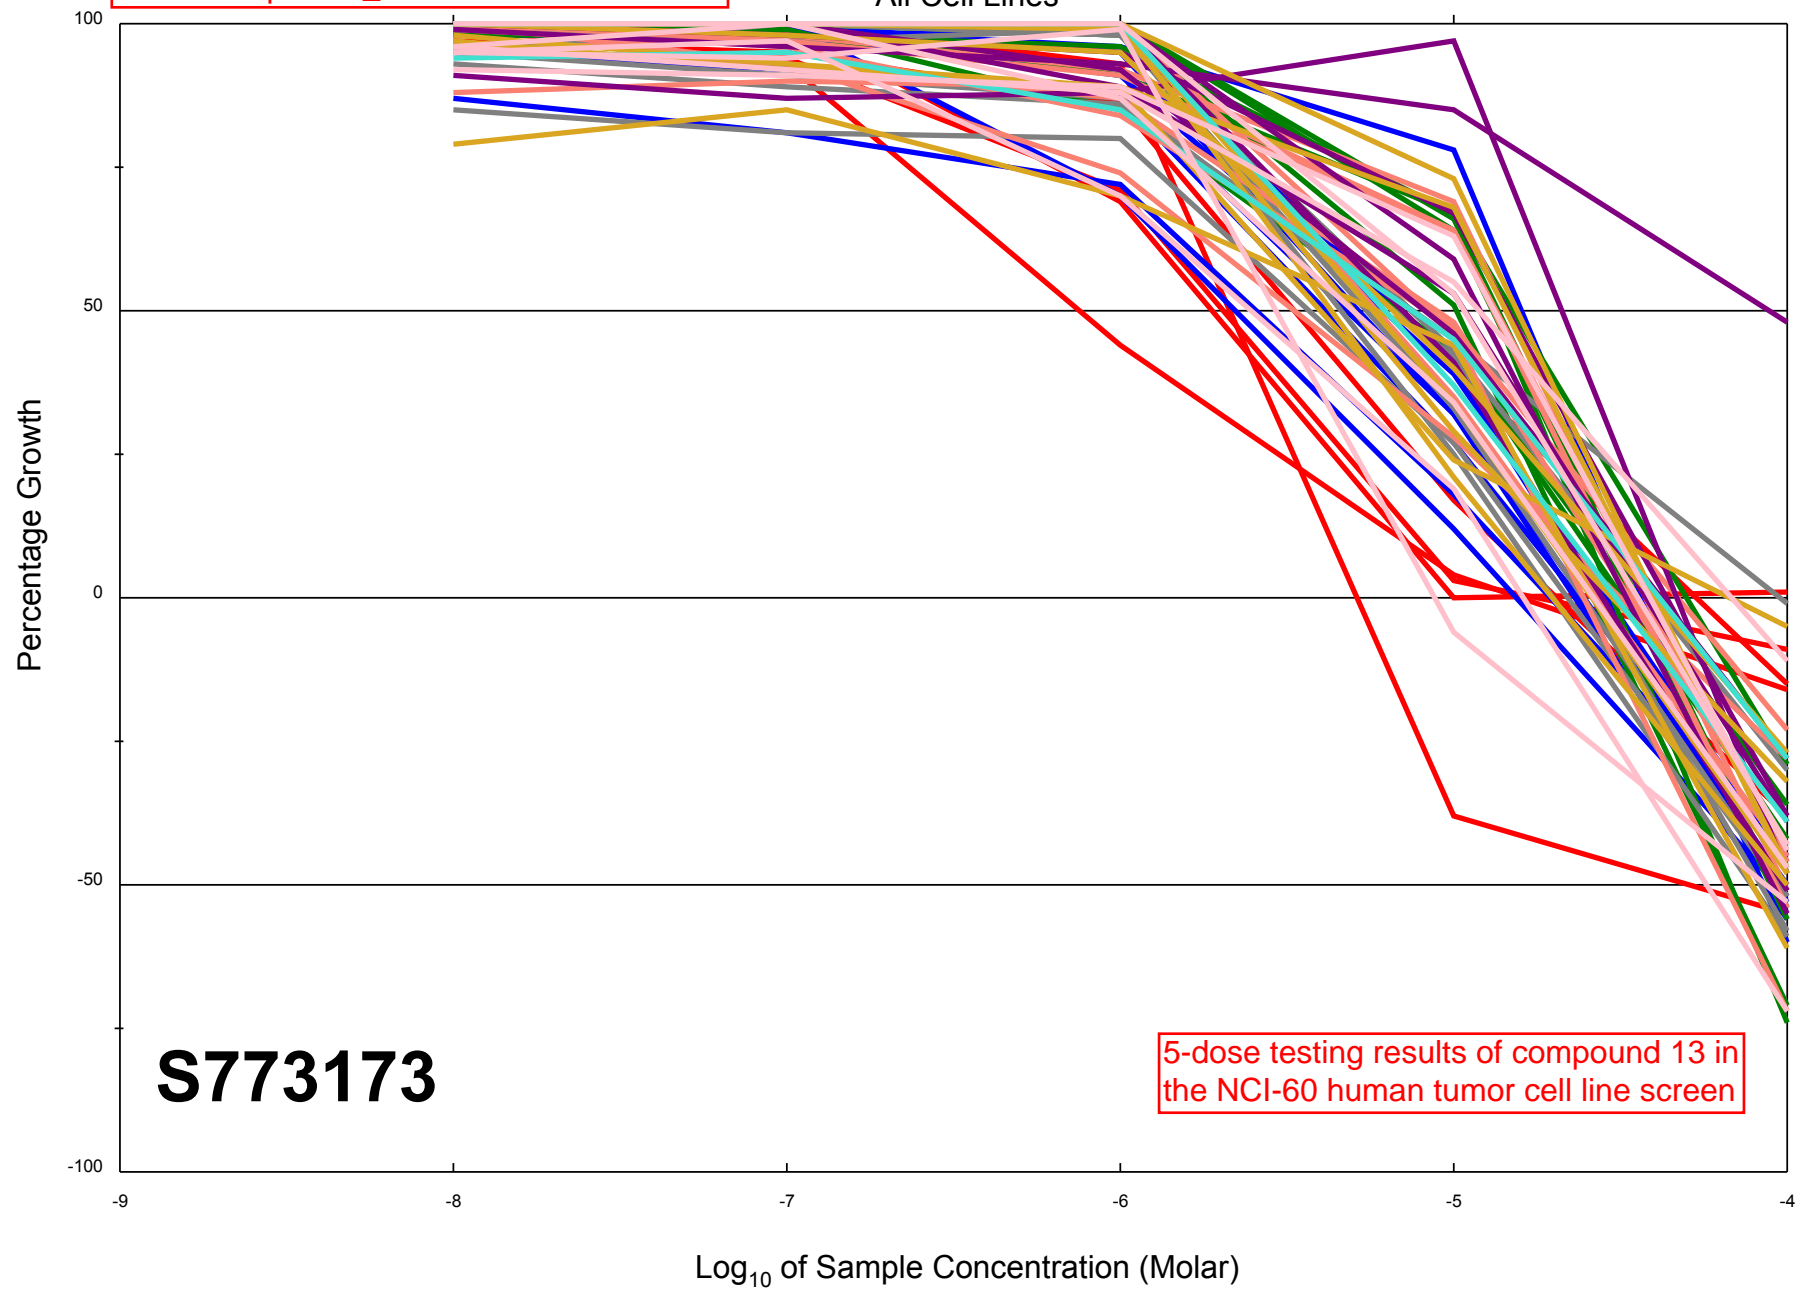

**S773173**

5-dose testing results of compound 13 in the NCI-60 human tumor cell line screen

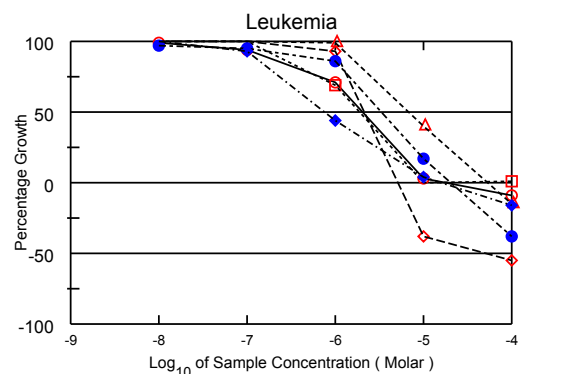

CCRF-CEM —○— HL-60(TB) —◇— K-562 —△—  
MOLT-4 —□— RPMI-8226 —●— SR —◆—

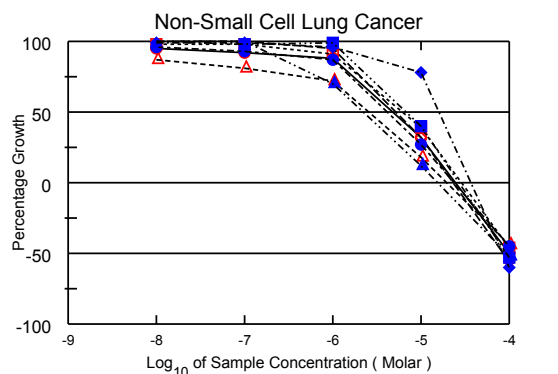

A549/ATCC —○— HOP-62 —◇— HOP-92 —△—  
NCI-H226 —□— NCI-H23 —●— NCI-H322M —◆—  
NCI-H460 —▲— NCI-H522 —■—

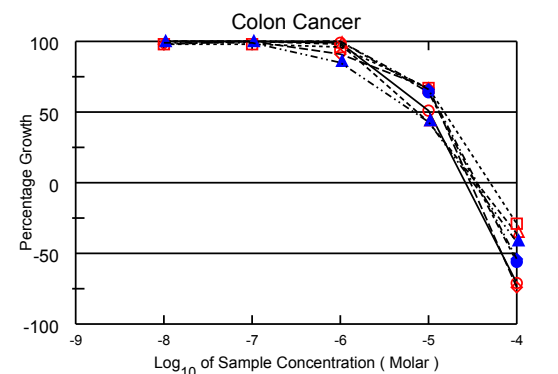

COLO 205 —○— HCC-2998 —◇— HCT-116 —△—  
HCT-15 —□— HT29 —●— KM12 —◆—  
SW-620 —▲—

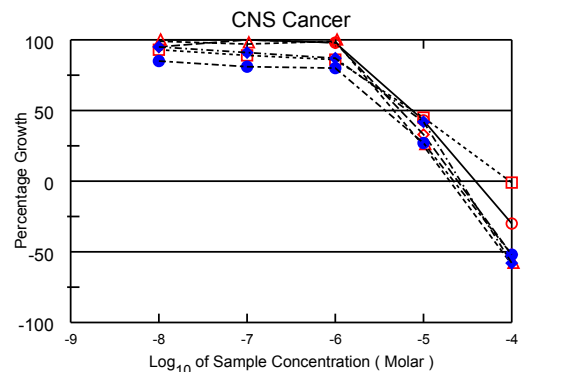

SF-268 —○— SF-295 —◇— SF-539 —△—  
SNB-19 —□— SNB-75 —●— U251 —◆—

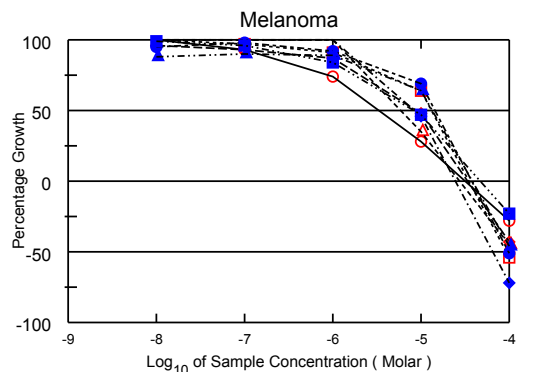

LOX IMVI —○— MALME-3M —◇— M14 —△—  
MDA-MB-435 —□— SK-MEL-28 —●— SK-MEL-5 —◆—  
UACC-257 —▲— UACC-62 —■—

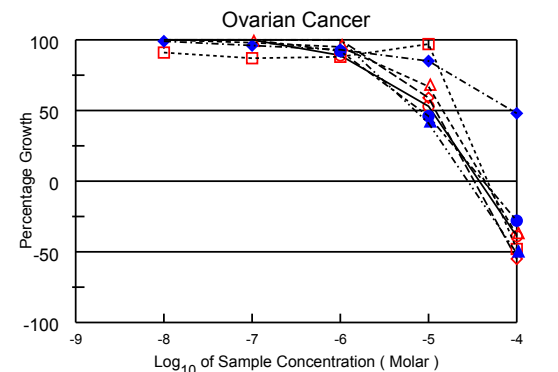

IGROV1 —○— OVCAR-3 —◇— OVCAR-4 —△—  
OVCAR-5 —□— OVCAR-8 —●— NCI/ADR-RES —◆—  
SK-OV-3 —▲—

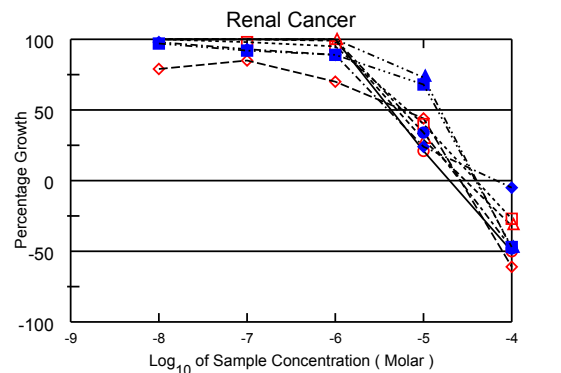

786-0 —○— A498 —◇— ACHN —△—  
CAKI-1 —□— RXF 393 —●— SN12C —◆—  
TK-10 —▲— UO-31 —■—

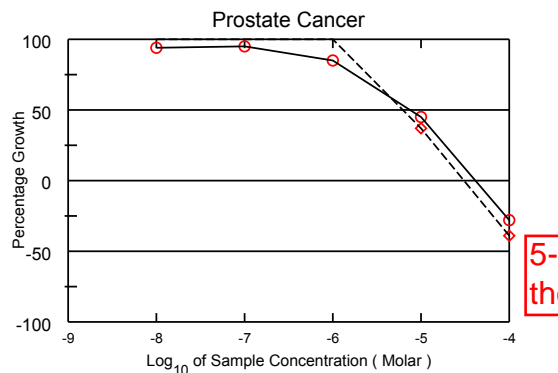

PC-3 —○— DU-145 —◇—

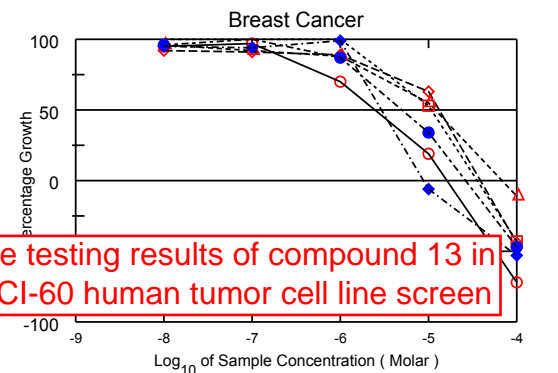

MCF7 —○— MDA-MB-231 —◇— HS 578T —△—  
BT-549 —□— T-47D —●— MDA-MB-468 —◆—

5-dose testing results of compound 13 in the NCI-60 human tumor cell line screen

## National Cancer Institute Developmental Therapeutics Program In-Vitro Testing Results

|                                  |                                       |                |               |
|----------------------------------|---------------------------------------|----------------|---------------|
| NSC : D - 773173 / 1             | Experiment ID : 1307NS30              | Test Type : 08 | Units : Molar |
| Report Date : September 19, 2013 | Test Date : July 15, 2013             | QNS :          | MC :          |
| COMI : AY-70-melphalan (127851)  | Stain Reagent : SRB Dual-Pass Related | SSPL : 0XMP    |               |

| Panel/Cell Line                   | Log10 Concentration |       |       |       |       |       |       |      |      |      |      |      | GI50    | TGI       | LC50      |
|-----------------------------------|---------------------|-------|-------|-------|-------|-------|-------|------|------|------|------|------|---------|-----------|-----------|
|                                   | Time Zero           | Ctrl  | -8.0  | -7.0  | -6.0  | -5.0  | -4.0  | -8.0 | -7.0 | -6.0 | -5.0 | -4.0 |         |           |           |
| <b>Leukemia</b>                   |                     |       |       |       |       |       |       |      |      |      |      |      |         |           |           |
| CCRF-CEM                          | 0.357               | 1.930 | 1.920 | 1.841 | 1.468 | 0.409 | 0.324 | 99   | 94   | 71   | 3    | -9   | 2.02E-6 | 1.82E-5   | > 1.00E-4 |
| HL-60(TB)                         | 0.775               | 2.054 | 2.160 | 2.102 | 1.959 | 0.484 | 0.350 | 108  | 104  | 93   | -38  | -55  | 2.12E-6 | 5.15E-6   | 5.25E-5   |
| K-562                             | 0.261               | 2.328 | 2.478 | 2.440 | 2.314 | 1.084 | 0.221 | 107  | 105  | 99   | 40   | -15  | 6.75E-6 | 5.27E-5   | > 1.00E-4 |
| MOLT-4                            | 0.770               | 2.872 | 3.021 | 2.974 | 2.227 | 0.770 | 0.787 | 107  | 105  | 69   | .    | 1    | 1.90E-6 | > 1.00E-4 | > 1.00E-4 |
| RPMI-8226                         | 0.835               | 2.716 | 2.661 | 2.626 | 2.447 | 1.151 | 0.521 | 97   | 95   | 86   | 17   | -38  | 3.30E-6 | 2.04E-5   | > 1.00E-4 |
| SR                                | 0.258               | 1.109 | 1.107 | 1.046 | 0.633 | 0.290 | 0.218 | 100  | 93   | 44   | 4    | -16  | 7.54E-7 | 1.57E-5   | > 1.00E-4 |
| <b>Non-Small Cell Lung Cancer</b> |                     |       |       |       |       |       |       |      |      |      |      |      |         |           |           |
| A549/ATCC                         | 0.375               | 1.935 | 1.852 | 1.804 | 1.753 | 0.874 | 0.189 | 95   | 92   | 88   | 32   | -50  | 4.79E-6 | 2.46E-5   | > 1.00E-4 |
| HOP-62                            | 0.280               | 0.714 | 0.731 | 0.713 | 0.692 | 0.420 | 0.124 | 104  | 100  | 95   | 32   | -56  | 5.21E-6 | 2.32E-5   | 8.57E-5   |
| HOP-92                            | 1.014               | 1.541 | 1.474 | 1.442 | 1.391 | 1.111 | 0.571 | 87   | 81   | 72   | 18   | -44  | 2.54E-6 | 1.97E-5   | > 1.00E-4 |
| NCI-H226                          | 0.871               | 2.143 | 2.123 | 2.124 | 2.033 | 1.363 | 0.474 | 98   | 98   | 91   | 39   | -46  | 6.09E-6 | 2.88E-5   | > 1.00E-4 |
| NCI-H23                           | 0.737               | 2.379 | 2.315 | 2.265 | 2.173 | 1.183 | 0.403 | 96   | 93   | 87   | 27   | -45  | 4.18E-6 | 2.37E-5   | > 1.00E-4 |
| NCI-H322M                         | 0.530               | 1.631 | 1.622 | 1.625 | 1.590 | 1.392 | 0.214 | 99   | 99   | 96   | 78   | -60  | 1.60E-5 | 3.69E-5   | 8.50E-5   |
| NCI-H460                          | 0.267               | 2.744 | 2.804 | 2.840 | 2.009 | 0.567 | 0.129 | 102  | 104  | 70   | 12   | -52  | 2.23E-6 | 1.55E-5   | 9.41E-5   |
| NCI-H522                          | 0.743               | 1.751 | 1.774 | 1.733 | 1.744 | 1.146 | 0.349 | 102  | 98   | 99   | 40   | -53  | 6.78E-6 | 2.69E-5   | 9.26E-5   |
| <b>Colon Cancer</b>               |                     |       |       |       |       |       |       |      |      |      |      |      |         |           |           |
| COLO 205                          | 0.523               | 2.153 | 2.260 | 2.248 | 2.136 | 1.348 | 0.154 | 107  | 106  | 99   | 51   | -71  | 1.01E-5 | 2.61E-5   | 6.76E-5   |
| HCC-2998                          | 0.960               | 3.115 | 3.069 | 3.115 | 2.928 | 2.403 | 0.249 | 98   | 100  | 91   | 67   | -74  | 1.32E-5 | 2.98E-5   | 6.75E-5   |
| HCT-116                           | 0.283               | 2.276 | 2.425 | 2.357 | 2.243 | 1.140 | 0.181 | 107  | 104  | 98   | 43   | -36  | 7.46E-6 | 3.50E-5   | > 1.00E-4 |
| HCT-15                            | 0.342               | 2.243 | 2.201 | 2.198 | 2.174 | 1.609 | 0.245 | 98   | 98   | 96   | 67   | -29  | 1.50E-5 | 5.02E-5   | > 1.00E-4 |
| HT29                              | 0.226               | 1.426 | 1.517 | 1.468 | 1.435 | 0.994 | 0.101 | 108  | 103  | 101  | 64   | -56  | 1.31E-5 | 3.43E-5   | 8.99E-5   |
| KM12                              | 0.573               | 2.766 | 2.811 | 2.880 | 2.863 | 2.013 | 0.265 | 102  | 105  | 104  | 66   | -54  | 1.35E-5 | 3.55E-5   | 9.30E-5   |
| SW-620                            | 0.386               | 2.711 | 2.679 | 2.690 | 2.372 | 1.395 | 0.224 | 99   | 99   | 85   | 43   | -42  | 6.97E-6 | 3.22E-5   | > 1.00E-4 |
| <b>CNS Cancer</b>                 |                     |       |       |       |       |       |       |      |      |      |      |      |         |           |           |
| SF-268                            | 0.734               | 2.162 | 2.175 | 2.204 | 2.139 | 1.348 | 0.512 | 101  | 103  | 98   | 43   | -30  | 7.48E-6 | 3.86E-5   | > 1.00E-4 |
| SF-295                            | 0.677               | 2.143 | 2.067 | 2.144 | 2.118 | 1.159 | 0.328 | 95   | 100  | 98   | 33   | -52  | 5.48E-6 | 2.45E-5   | 9.59E-5   |
| SF-539                            | 1.065               | 2.822 | 2.797 | 2.769 | 2.811 | 1.509 | 0.437 | 99   | 97   | 99   | 25   | -59  | 4.64E-6 | 2.00E-5   | 7.83E-5   |
| SNB-19                            | 0.790               | 2.299 | 2.192 | 2.139 | 2.083 | 1.468 | 0.782 | 93   | 89   | 86   | 45   | -1   | 7.50E-6 | 9.48E-5   | > 1.00E-4 |
| SNB-75                            | 0.774               | 1.525 | 1.412 | 1.383 | 1.372 | 0.979 | 0.374 | 85   | 81   | 80   | 27   | -52  | 3.67E-6 | 2.21E-5   | 9.52E-5   |
| U251                              | 0.406               | 1.728 | 1.665 | 1.605 | 1.551 | 0.956 | 0.173 | 95   | 91   | 87   | 42   | -58  | 6.51E-6 | 2.63E-5   | 8.40E-5   |
| <b>Melanoma</b>                   |                     |       |       |       |       |       |       |      |      |      |      |      |         |           |           |
| LOX IMVI                          | 0.305               | 2.444 | 2.452 | 2.300 | 1.886 | 0.899 | 0.221 | 100  | 93   | 74   | 28   | -28  | 3.30E-6 | 3.18E-5   | > 1.00E-4 |
| MALME-3M                          | 0.509               | 1.302 | 1.270 | 1.243 | 1.199 | 0.889 | 0.290 | 96   | 93   | 87   | 48   | -43  | 8.86E-6 | 3.36E-5   | > 1.00E-4 |
| M14                               | 0.578               | 2.310 | 2.344 | 2.362 | 2.313 | 1.189 | 0.320 | 102  | 103  | 100  | 35   | -45  | 5.92E-6 | 2.76E-5   | > 1.00E-4 |
| MDA-MB-435                        | 0.538               | 2.219 | 2.219 | 2.169 | 2.069 | 1.621 | 0.249 | 100  | 97   | 91   | 64   | -54  | 1.32E-5 | 3.51E-5   | 9.28E-5   |
| SK-MEL-28                         | 0.542               | 1.792 | 1.732 | 1.767 | 1.694 | 1.402 | 0.263 | 95   | 98   | 92   | 69   | -51  | 1.43E-5 | 3.73E-5   | 9.72E-5   |
| SK-MEL-5                          | 0.757               | 2.678 | 2.678 | 2.720 | 2.677 | 1.635 | 0.210 | 100  | 102  | 100  | 46   | -72  | 8.33E-6 | 2.44E-5   | 6.47E-5   |
| UACC-257                          | 0.880               | 2.002 | 1.869 | 1.885 | 1.876 | 1.598 | 0.474 | 88   | 90   | 89   | 64   | -46  | 1.34E-5 | 3.81E-5   | > 1.00E-4 |
| UACC-62                           | 0.900               | 2.864 | 2.843 | 2.787 | 2.547 | 1.814 | 0.697 | 99   | 96   | 84   | 47   | -23  | 8.07E-6 | 4.72E-5   | > 1.00E-4 |
| <b>Ovarian Cancer</b>             |                     |       |       |       |       |       |       |      |      |      |      |      |         |           |           |
| IGROV1                            | 0.339               | 1.466 | 1.522 | 1.479 | 1.346 | 0.932 | 0.207 | 105  | 101  | 89   | 53   | -39  | 1.07E-5 | 3.75E-5   | > 1.00E-4 |
| OVCAR-3                           | 0.767               | 2.066 | 2.177 | 2.277 | 2.191 | 1.534 | 0.346 | 109  | 116  | 110  | 59   | -55  | 1.20E-5 | 3.30E-5   | 9.05E-5   |
| OVCAR-4                           | 0.957               | 1.483 | 1.554 | 1.471 | 1.459 | 1.311 | 0.597 | 113  | 98   | 95   | 67   | -38  | 1.46E-5 | 4.37E-5   | > 1.00E-4 |
| OVCAR-5                           | 0.663               | 1.423 | 1.357 | 1.327 | 1.331 | 1.402 | 0.346 | 91   | 87   | 88   | 97   | -48  | 2.12E-5 | 4.68E-5   | > 1.00E-4 |
| OVCAR-8                           | 0.483               | 2.182 | 2.175 | 2.196 | 2.054 | 1.262 | 0.346 | 100  | 101  | 92   | 46   | -28  | 8.15E-6 | 4.15E-5   | > 1.00E-4 |
| NCI/ADR-RES                       | 0.727               | 2.360 | 2.341 | 2.288 | 2.244 | 2.120 | 1.510 | 99   | 96   | 93   | 85   | 48   | 8.80E-5 | > 1.00E-4 | > 1.00E-4 |
| SK-OV-3                           | 0.491               | 1.014 | 1.038 | 1.034 | 1.021 | 0.706 | 0.240 | 105  | 104  | 101  | 41   | -51  | 7.12E-6 | 2.79E-5   | 9.72E-5   |
| <b>Renal Cancer</b>               |                     |       |       |       |       |       |       |      |      |      |      |      |         |           |           |
| 786-0                             | 0.934               | 2.751 | 2.771 | 2.830 | 2.795 | 1.313 | 0.470 | 101  | 104  | 102  | 21   | -50  | 4.39E-6 | 1.97E-5   | > 1.00E-4 |
| A498                              | 1.622               | 2.649 | 2.437 | 2.498 | 2.342 | 2.074 | 0.629 | 79   | 85   | 70   | 44   | -61  | 5.88E-6 | 2.62E-5   | 7.82E-5   |
| ACHN                              | 0.337               | 1.795 | 1.811 | 1.790 | 1.787 | 0.754 | 0.229 | 101  | 100  | 99   | 29   | -32  | 4.99E-6 | 2.95E-5   | > 1.00E-4 |
| CAKI-1                            | 0.684               | 2.417 | 2.437 | 2.390 | 2.337 | 1.375 | 0.497 | 101  | 98   | 95   | 40   | -27  | 6.57E-6 | 3.92E-5   | > 1.00E-4 |
| RXF 393                           | 0.920               | 1.535 | 1.532 | 1.556 | 1.573 | 1.131 | 0.480 | 100  | 103  | 106  | 34   | -48  | 6.05E-6 | 2.62E-5   | > 1.00E-4 |
| SN12C                             | 0.746               | 2.675 | 2.634 | 2.550 | 2.467 | 1.214 | 0.707 | 98   | 93   | 89   | 24   | -5   | 4.01E-6 | 6.65E-5   | > 1.00E-4 |
| TK-10                             | 0.742               | 1.776 | 1.813 | 1.832 | 1.831 | 1.493 | 0.390 | 104  | 105  | 105  | 73   | -48  | 1.54E-5 | 4.02E-5   | > 1.00E-4 |
| UO-31                             | 0.533               | 1.997 | 1.948 | 1.883 | 1.838 | 1.530 | 0.281 | 97   | 92   | 89   | 68   | -47  | 1.43E-5 | 3.89E-5   | > 1.00E-4 |
| <b>Prostate Cancer</b>            |                     |       |       |       |       |       |       |      |      |      |      |      |         |           |           |
| PC-3                              | 0.537               | 1.543 | 1.480 | 1.489 | 1.396 | 0.990 | 0.385 | 94   | 95   | 85   | 45   | -28  | 7.51E-6 | 4.10E-5   | > 1.00E-4 |
| DU-145                            | 0.390               | 1.624 | 1.670 | 1.710 | 1.687 | 0.850 | 0.236 | 104  | 107  | 105  | 37   | -39  | 6.49E-6 | 3.06E-5   | > 1.00E-4 |
| <b>Breast Cancer</b>              |                     |       |       |       |       |       |       |      |      |      |      |      |         |           |           |
| MCF7                              | 0.461               | 2.096 | 2.015 | 2.046 | 1.612 | 0.775 | 0.129 | 95   | 97   | 70   | 19   | -72  | 2.50E-6 | 1.62E-5   | 5.72E-5   |
| MDA-MB-231/ATCC                   | 0.505               | 1.310 | 1.246 | 1.239 | 1.218 | 1.013 | 0.281 | 92   | 91   | 89   | 63   | -44  | 1.32E-5 | 3.87E-5   | > 1.00E-4 |
| HS 578T                           | 1.186               | 2.332 | 2.288 | 2.236 | 2.200 | 1.821 | 1.059 | 96   | 92   | 88   | 55   | -11  | 1.21E-5 | 6.88E-5   | > 1.00E-4 |
| BT-549                            | 1.186               | 2.088 | 2.110 | 2.152 | 2.102 | 1.665 | 0.678 | 102  | 107  | 102  | 53   | -43  | 1.08E-5 | 3.58E-5   | > 1.00E-4 |
| T-47D                             | 0.584               | 1.323 | 1.291 | 1.338 | 1.223 | 0.836 | 0.312 | 96   | 102  | 87   | 34   | -47  | 4.98E-6 | 2.65E-5   | > 1.00E-4 |
| MDA-MB-468                        | 0.766               | 1.336 | 1.305 | 1.300 | 1.331 | 0.720 | 0.358 | 95   | 94   | 99   | -6   | -53  | 2.93E-6 | 8.77E-6   | 8.50E-5   |

5-dose testing results of compound 13 in the NCI-60 human tumor cell line screen



Mean Graphs

Report Date :September 19, 2013

Test Date :July 15, 2013

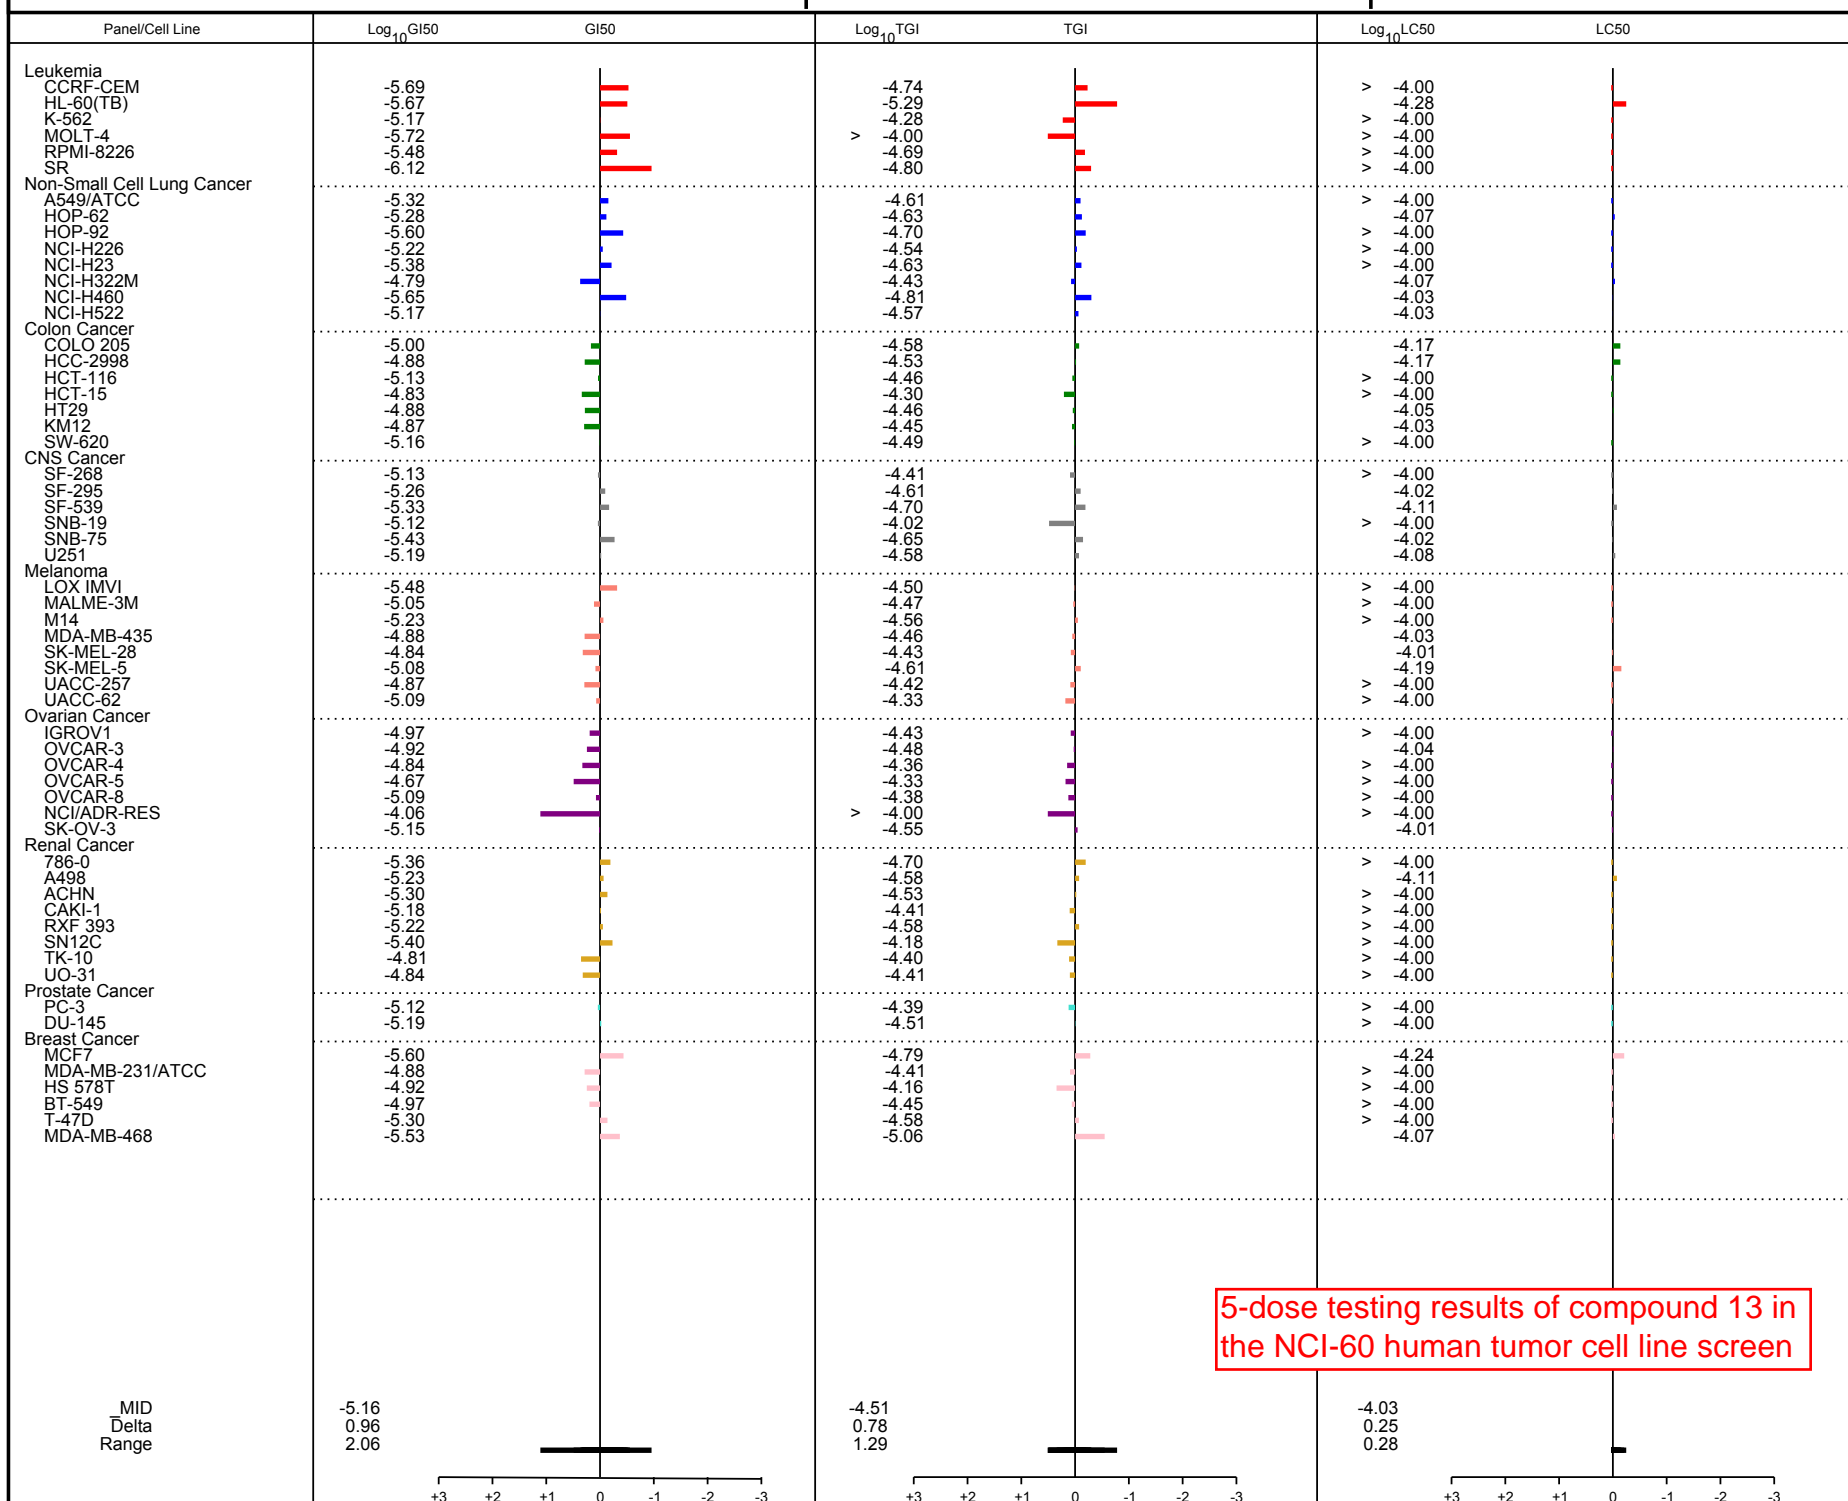

5-dose testing results of compound 13 in the NCI-60 human tumor cell line screen

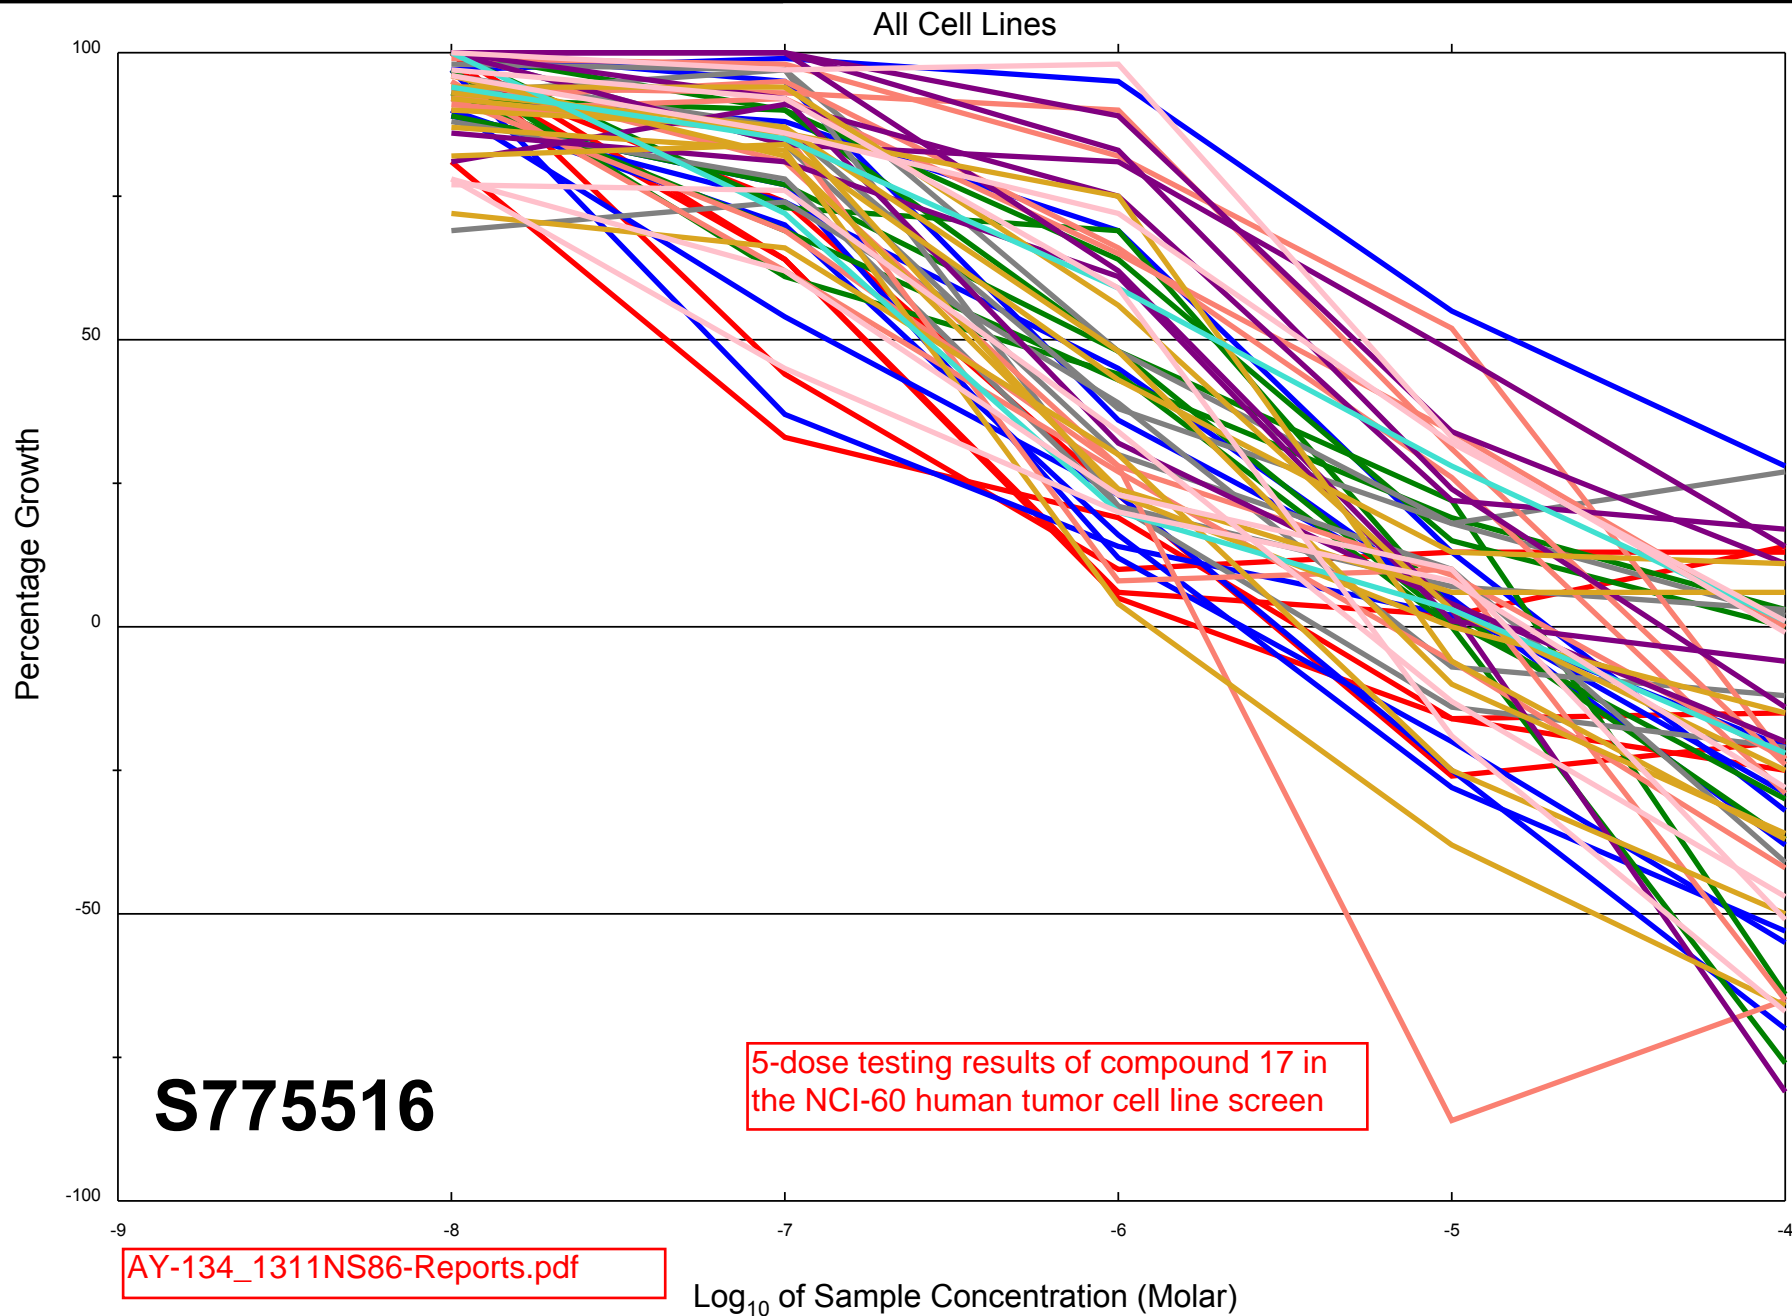

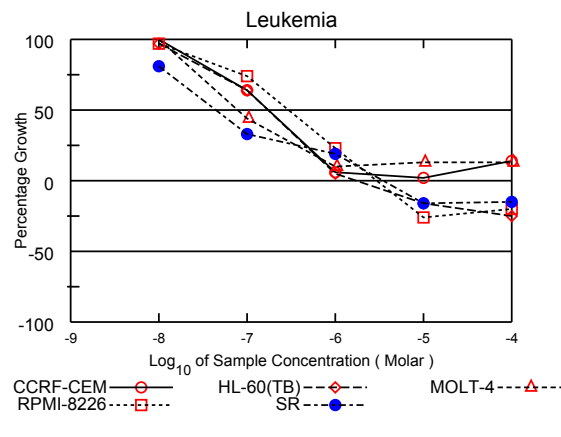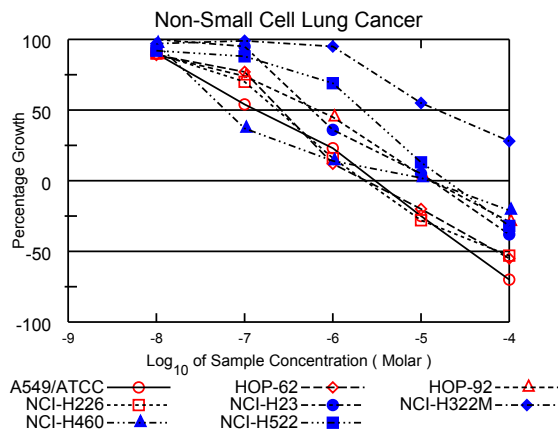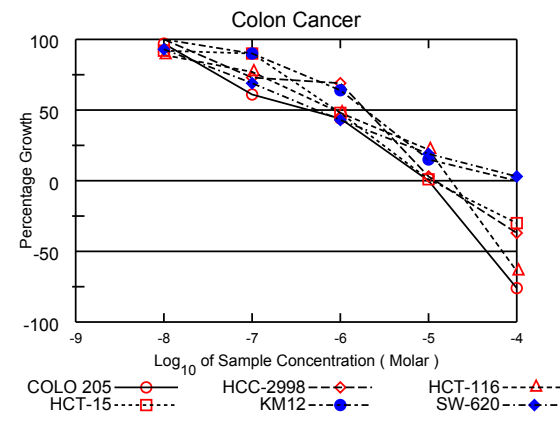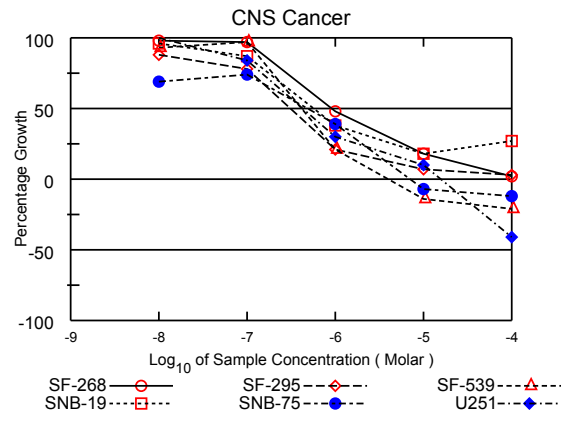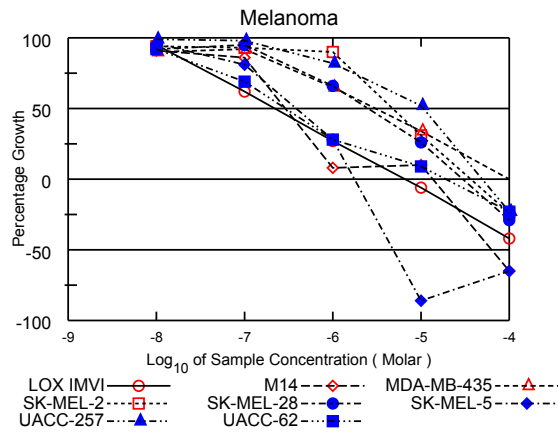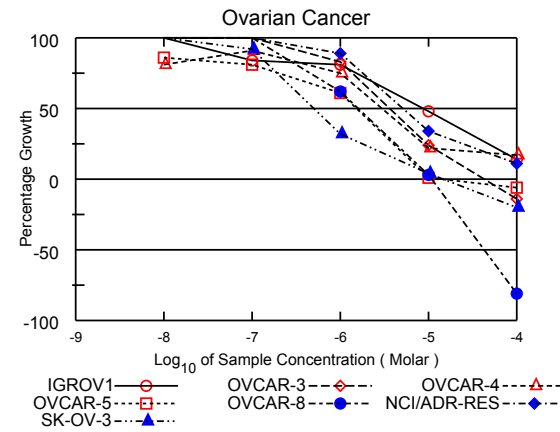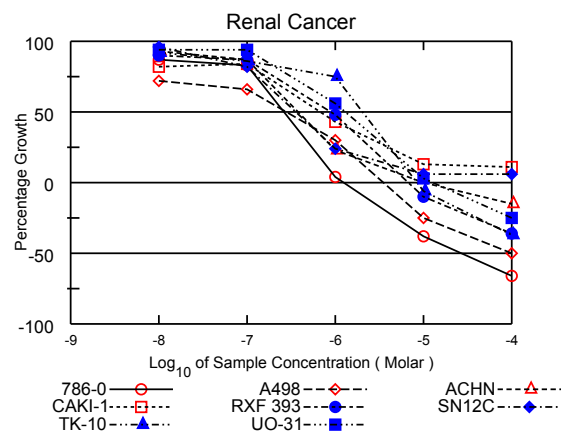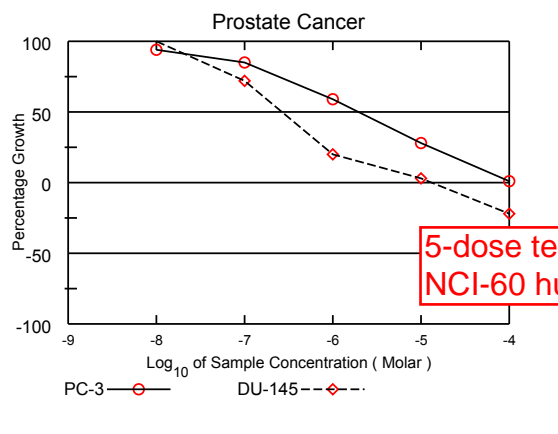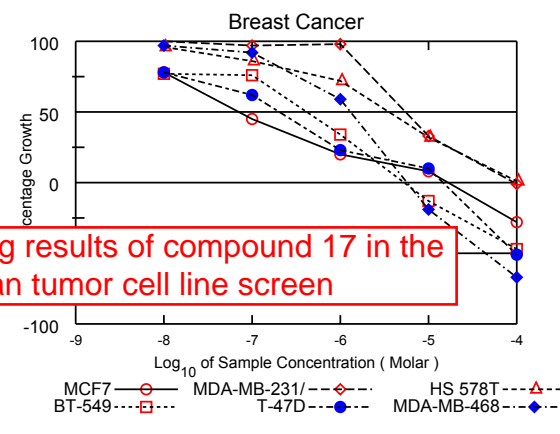

5-dose testing results of compound 17 in the NCI-60 human tumor cell line screen

## National Cancer Institute Developmental Therapeutics Program In-Vitro Testing Results

|                                |                                       |                |               |
|--------------------------------|---------------------------------------|----------------|---------------|
| NSC : D - 775516 / 1           | Experiment ID : 1311NS86              | Test Type : 08 | Units : Molar |
| Report Date : January 15, 2014 | Test Date : November 12, 2013         | QNS :          | MC :          |
| COMI : AY-134 (130531)         | Stain Reagent : SRB Dual-Pass Related | SSPL : 0XMP    |               |

| Panel/Cell Line                   | Time Zero | Log10 Concentration |       |       |       |       |       |      | Percent Growth |      |      |      |         | GI50      | TGI       | LC50 |
|-----------------------------------|-----------|---------------------|-------|-------|-------|-------|-------|------|----------------|------|------|------|---------|-----------|-----------|------|
|                                   |           | Ctrl                | -8.0  | -7.0  | -6.0  | -5.0  | -4.0  | -8.0 | -7.0           | -6.0 | -5.0 | -4.0 |         |           |           |      |
| <b>Leukemia</b>                   |           |                     |       |       |       |       |       |      |                |      |      |      |         |           |           |      |
| CCRF-CEM                          | 0.539     | 1.789               | 1.841 | 1.337 | 0.617 | 0.569 | 0.713 | 104  | 64             | 6    | 2    | 14   | 1.74E-7 | > 1.00E-4 | > 1.00E-4 |      |
| HL-60(TB)                         | 0.667     | 2.690               | 2.639 | 1.956 | 0.764 | 0.561 | 0.498 | 97   | 64             | 5    | -16  | -25  | 1.71E-7 | 1.70E-6   | > 1.00E-4 |      |
| MOLT-4                            | 0.612     | 2.091               | 2.103 | 1.257 | 0.762 | 0.799 | 0.810 | 101  | 44             | 10   | 13   | 13   | 7.73E-8 | > 1.00E-4 | > 1.00E-4 |      |
| RPMI-8226                         | 0.957     | 2.305               | 2.261 | 1.950 | 1.262 | 0.707 | 0.764 | 97   | 74             | 23   | -26  | -20  | 2.91E-7 | 2.91E-6   | > 1.00E-4 |      |
| SR                                | 0.252     | 1.022               | 0.879 | 0.504 | 0.398 | 0.213 | 0.214 | 81   | 33             | 19   | -16  | -15  | 4.41E-8 | 3.52E-6   | > 1.00E-4 |      |
| <b>Non-Small Cell Lung Cancer</b> |           |                     |       |       |       |       |       |      |                |      |      |      |         |           |           |      |
| A549/ATCC                         | 0.398     | 1.448               | 1.346 | 0.964 | 0.639 | 0.300 | 0.118 | 90   | 54             | 23   | -25  | -70  | 1.33E-7 | 3.02E-6   | 3.58E-5   |      |
| HOP-62                            | 0.830     | 1.874               | 1.760 | 1.631 | 0.958 | 0.661 | 0.377 | 89   | 77             | 12   | -20  | -55  | 2.60E-7 | 2.37E-6   | 7.35E-5   |      |
| HOP-92                            | 0.944     | 1.483               | 1.421 | 1.341 | 1.189 | 0.965 | 0.666 | 89   | 74             | 45   | 4    | -29  | 6.90E-7 | 1.30E-5   | > 1.00E-4 |      |
| NCI-H226                          | 0.851     | 2.230               | 2.086 | 1.811 | 1.070 | 0.612 | 0.399 | 90   | 70             | 16   | -28  | -53  | 2.32E-7 | 2.29E-6   | 7.50E-5   |      |
| NCI-H23                           | 0.672     | 2.020               | 2.017 | 1.959 | 1.157 | 0.738 | 0.416 | 100  | 95             | 36   | 5    | -38  | 5.81E-7 | 1.30E-5   | > 1.00E-4 |      |
| NCI-H322M                         | 0.888     | 2.264               | 2.220 | 2.256 | 2.197 | 1.648 | 1.269 | 97   | 99             | 95   | 55   | 28   | 1.55E-5 | > 1.00E-4 | > 1.00E-4 |      |
| NCI-H460                          | 0.386     | 3.194               | 3.096 | 1.416 | 0.780 | 0.439 | 0.307 | 97   | 37             | 14   | 2    | -21  | 5.99E-8 | 1.21E-5   | > 1.00E-4 |      |
| NCI-H522                          | 1.103     | 2.243               | 2.152 | 2.110 | 1.887 | 1.246 | 0.745 | 92   | 88             | 69   | 13   | -32  | 2.16E-6 | 1.90E-5   | > 1.00E-4 |      |
| <b>Colon Cancer</b>               |           |                     |       |       |       |       |       |      |                |      |      |      |         |           |           |      |
| COLO 205                          | 0.527     | 1.474               | 1.443 | 1.102 | 0.940 | 0.529 | 0.129 | 97   | 61             | 44   | .    | -76  | 4.24E-7 | 1.01E-5   | 4.60E-5   |      |
| HCC-2998                          | 0.568     | 1.952               | 1.999 | 1.576 | 1.519 | 0.605 | 0.358 | 103  | 73             | 69   | 3    | -37  | 1.92E-6 | 1.17E-5   | > 1.00E-4 |      |
| HCT-116                           | 0.207     | 1.644               | 1.483 | 1.315 | 0.896 | 0.522 | 0.074 | 89   | 77             | 48   | 22   | -64  | 8.50E-7 | 1.79E-5   | 6.80E-5   |      |
| HCT-15                            | 0.284     | 2.198               | 2.049 | 2.012 | 1.200 | 0.298 | 0.200 | 92   | 90             | 48   | 1    | -30  | 8.90E-7 | 1.05E-5   | > 1.00E-4 |      |
| KM12                              | 0.508     | 2.572               | 2.566 | 2.372 | 1.820 | 0.810 | 0.506 | 100  | 90             | 64   | 15   | .    | 1.89E-6 | 9.41E-5   | > 1.00E-4 |      |
| SW-620                            | 0.314     | 2.556               | 2.402 | 1.854 | 1.282 | 0.749 | 0.390 | 93   | 69             | 43   | 19   | 3    | 5.40E-7 | > 1.00E-4 | > 1.00E-4 |      |
| <b>CNS Cancer</b>                 |           |                     |       |       |       |       |       |      |                |      |      |      |         |           |           |      |
| SF-268                            | 0.564     | 1.961               | 1.928 | 1.915 | 1.240 | 0.816 | 0.591 | 98   | 97             | 48   | 18   | 2    | 9.26E-7 | > 1.00E-4 | > 1.00E-4 |      |
| SF-295                            | 0.641     | 2.665               | 2.416 | 2.221 | 1.072 | 0.780 | 0.700 | 88   | 78             | 21   | 7    | 3    | 3.12E-7 | > 1.00E-4 | > 1.00E-4 |      |
| SF-539                            | 0.954     | 2.574               | 2.465 | 2.525 | 1.295 | 0.822 | 0.752 | 93   | 97             | 21   | -14  | -21  | 4.15E-7 | 4.00E-6   | > 1.00E-4 |      |
| SNB-19                            | 0.705     | 2.297               | 2.231 | 2.097 | 1.315 | 0.989 | 1.138 | 96   | 87             | 38   | 18   | 27   | 5.77E-7 | > 1.00E-4 | > 1.00E-4 |      |
| SNB-75                            | 0.763     | 1.519               | 1.285 | 1.319 | 1.060 | 0.708 | 0.671 | 69   | 74             | 39   | -7   | -12  | 4.87E-7 | 7.00E-6   | > 1.00E-4 |      |
| U251                              | 0.597     | 2.006               | 2.013 | 1.775 | 1.018 | 0.740 | 0.350 | 101  | 84             | 30   | 10   | -41  | 4.22E-7 | 1.57E-5   | > 1.00E-4 |      |
| <b>Melanoma</b>                   |           |                     |       |       |       |       |       |      |                |      |      |      |         |           |           |      |
| LOX IMVI                          | 0.316     | 2.107               | 2.022 | 1.428 | 0.799 | 0.296 | 0.182 | 95   | 62             | 27   | -6   | -42  | 2.21E-7 | 6.40E-6   | > 1.00E-4 |      |
| M14                               | 0.452     | 1.628               | 1.518 | 1.459 | 0.551 | 0.571 | 0.159 | 91   | 86             | 8    | 10   | -65  | 2.90E-7 | 1.36E-5   | 6.34E-5   |      |
| MDA-MB-435                        | 0.554     | 2.501               | 2.299 | 2.348 | 1.818 | 1.220 | 0.553 | 90   | 92             | 65   | 34   | .    | 3.06E-6 | 9.82E-5   | > 1.00E-4 |      |
| SK-MEL-2                          | 1.069     | 2.165               | 2.098 | 2.086 | 2.058 | 1.414 | 0.810 | 94   | 93             | 90   | 31   | -24  | 4.83E-6 | 3.67E-5   | > 1.00E-4 |      |
| SK-MEL-28                         | 0.627     | 1.924               | 1.818 | 1.860 | 1.477 | 0.969 | 0.446 | 92   | 95             | 66   | 26   | -29  | 2.49E-6 | 3.00E-5   | > 1.00E-4 |      |
| SK-MEL-5                          | 0.621     | 2.415               | 2.336 | 2.072 | 1.122 | 0.087 | 0.219 | 96   | 81             | 28   | -86  | -65  | 3.83E-7 | 1.76E-6   | 4.83E-6   |      |
| UACC-257                          | 1.042     | 1.991               | 1.979 | 1.973 | 1.819 | 1.535 | 0.808 | 99   | 98             | 82   | 52   | -23  | 1.06E-5 | 4.98E-5   | > 1.00E-4 |      |
| UACC-62                           | 0.774     | 2.982               | 2.811 | 2.304 | 1.390 | 0.964 | 0.595 | 92   | 69             | 28   | 9    | -23  | 2.92E-7 | 1.86E-5   | > 1.00E-4 |      |
| <b>Ovarian Cancer</b>             |           |                     |       |       |       |       |       |      |                |      |      |      |         |           |           |      |
| IGROV1                            | 0.763     | 2.310               | 2.356 | 2.068 | 2.022 | 1.501 | 0.981 | 103  | 84             | 81   | 48   | 14   | 8.56E-6 | > 1.00E-4 | > 1.00E-4 |      |
| OVCAR-3                           | 0.513     | 1.684               | 1.768 | 1.690 | 1.490 | 0.799 | 0.440 | 107  | 100            | 83   | 24   | -14  | 3.68E-6 | 4.28E-5   | > 1.00E-4 |      |
| OVCAR-4                           | 0.665     | 1.425               | 1.281 | 1.357 | 1.232 | 0.835 | 0.792 | 81   | 91             | 75   | 22   | 17   | 2.96E-6 | > 1.00E-4 | > 1.00E-4 |      |
| OVCAR-5                           | 0.693     | 1.575               | 1.451 | 1.411 | 1.231 | 0.705 | 0.652 | 86   | 81             | 61   | 1    | -6   | 1.52E-6 | 1.51E-5   | > 1.00E-4 |      |
| OVCAR-8                           | 0.632     | 2.053               | 2.195 | 2.178 | 1.519 | 0.679 | 0.123 | 110  | 109            | 62   | 3    | -81  | 1.62E-6 | 1.09E-5   | 4.32E-5   |      |
| NCI/ADR-RES                       | 0.494     | 1.782               | 1.837 | 1.865 | 1.638 | 0.928 | 0.630 | 104  | 106            | 89   | 34   | 11   | 5.05E-6 | > 1.00E-4 | > 1.00E-4 |      |
| SK-OV-3                           | 0.933     | 1.627               | 1.629 | 1.573 | 1.155 | 0.958 | 0.745 | 100  | 92             | 32   | 4    | -20  | 5.02E-7 | 1.42E-5   | > 1.00E-4 |      |
| <b>Renal Cancer</b>               |           |                     |       |       |       |       |       |      |                |      |      |      |         |           |           |      |
| 786-0                             | 0.506     | 1.919               | 1.731 | 1.680 | 0.556 | 0.313 | 0.172 | 87   | 83             | 4    | -38  | -66  | 2.61E-7 | 1.22E-6   | 2.64E-5   |      |
| A498                              | 1.386     | 2.280               | 2.031 | 1.973 | 1.652 | 1.034 | 0.692 | 72   | 66             | 30   | -25  | -50  | 2.73E-7 | 3.46E-6   | 9.93E-5   |      |
| ACHN                              | 0.448     | 1.883               | 1.779 | 1.695 | 0.779 | 0.451 | 0.383 | 93   | 87             | 23   | .    | -15  | 3.78E-7 | 1.03E-5   | > 1.00E-4 |      |
| CAKI-1                            | 0.613     | 2.660               | 2.298 | 2.336 | 1.501 | 0.877 | 0.833 | 82   | 84             | 43   | 13   | 11   | 6.87E-7 | > 1.00E-4 | > 1.00E-4 |      |
| RXF 393                           | 0.735     | 1.307               | 1.248 | 1.233 | 1.011 | 0.665 | 0.467 | 90   | 87             | 48   | -10  | -36  | 9.03E-7 | 6.83E-6   | > 1.00E-4 |      |
| SN12C                             | 0.945     | 3.091               | 3.012 | 2.714 | 1.451 | 1.069 | 1.083 | 96   | 82             | 24   | 6    | 6    | 3.55E-7 | > 1.00E-4 | > 1.00E-4 |      |
| TK-10                             | 0.971     | 2.214               | 2.119 | 2.042 | 1.898 | 0.915 | 0.612 | 92   | 86             | 75   | -6   | -37  | 2.02E-6 | 8.46E-6   | > 1.00E-4 |      |
| UO-31                             | 0.831     | 2.304               | 2.217 | 2.210 | 1.650 | 0.873 | 0.627 | 94   | 94             | 56   | 3    | -25  | 1.28E-6 | 1.27E-5   | > 1.00E-4 |      |
| <b>Prostate Cancer</b>            |           |                     |       |       |       |       |       |      |                |      |      |      |         |           |           |      |
| PC-3                              | 0.671     | 1.600               | 1.547 | 1.463 | 1.223 | 0.932 | 0.679 | 94   | 85             | 59   | 28   | 1    | 2.00E-6 | > 1.00E-4 | > 1.00E-4 |      |
| DU-145                            | 0.354     | 1.578               | 1.629 | 1.230 | 0.602 | 0.396 | 0.277 | 104  | 72             | 20   | 3    | -22  | 2.63E-7 | 1.37E-5   | > 1.00E-4 |      |
| <b>Breast Cancer</b>              |           |                     |       |       |       |       |       |      |                |      |      |      |         |           |           |      |
| MCF7                              | 0.349     | 1.961               | 1.612 | 1.072 | 0.674 | 0.480 | 0.252 | 78   | 45             | 20   | 8    | -28  | 7.01E-8 | 1.68E-5   | > 1.00E-4 |      |
| MDA-MB-231/ATCC                   | 0.612     | 1.400               | 1.437 | 1.379 | 1.384 | 0.869 | 0.604 | 105  | 97             | 98   | 33   | -1   | 5.41E-6 | 9.10E-5   | > 1.00E-4 |      |
| HS 578T                           | 1.009     | 2.066               | 2.019 | 1.914 | 1.765 | 1.343 | 1.017 | 96   | 86             | 72   | 32   | 1    | 3.46E-6 | > 1.00E-4 | > 1.00E-4 |      |
| BT-549                            | 0.820     | 1.452               | 1.307 | 1.300 | 1.033 | 0.716 | 0.439 | 77   | 76             | 34   | -13  | -47  | 4.11E-7 | 5.33E-6   | > 1.00E-4 |      |
| T-47D                             | 0.857     | 1.526               | 1.377 | 1.269 | 1.010 | 0.927 | 0.419 | 78   | 62             | 23   | 10   | -51  | 1.99E-7 | 1.48E-5   | 9.59E-5   |      |
| MDA-MB-468                        | 0.681     | 1.181               | 1.167 | 1.143 | 0.976 | 0.552 | 0.222 | 97   | 92             | 59   | -19  | -67  | 1.30E-6 | 5.70E-6   | 4.36E-5   |      |

5-dose testing results of compound 17 in  
the NCI-60 human tumor cell line screen

Mean Graphs

Report Date :January 15, 2014

Test Date :November 12, 2013

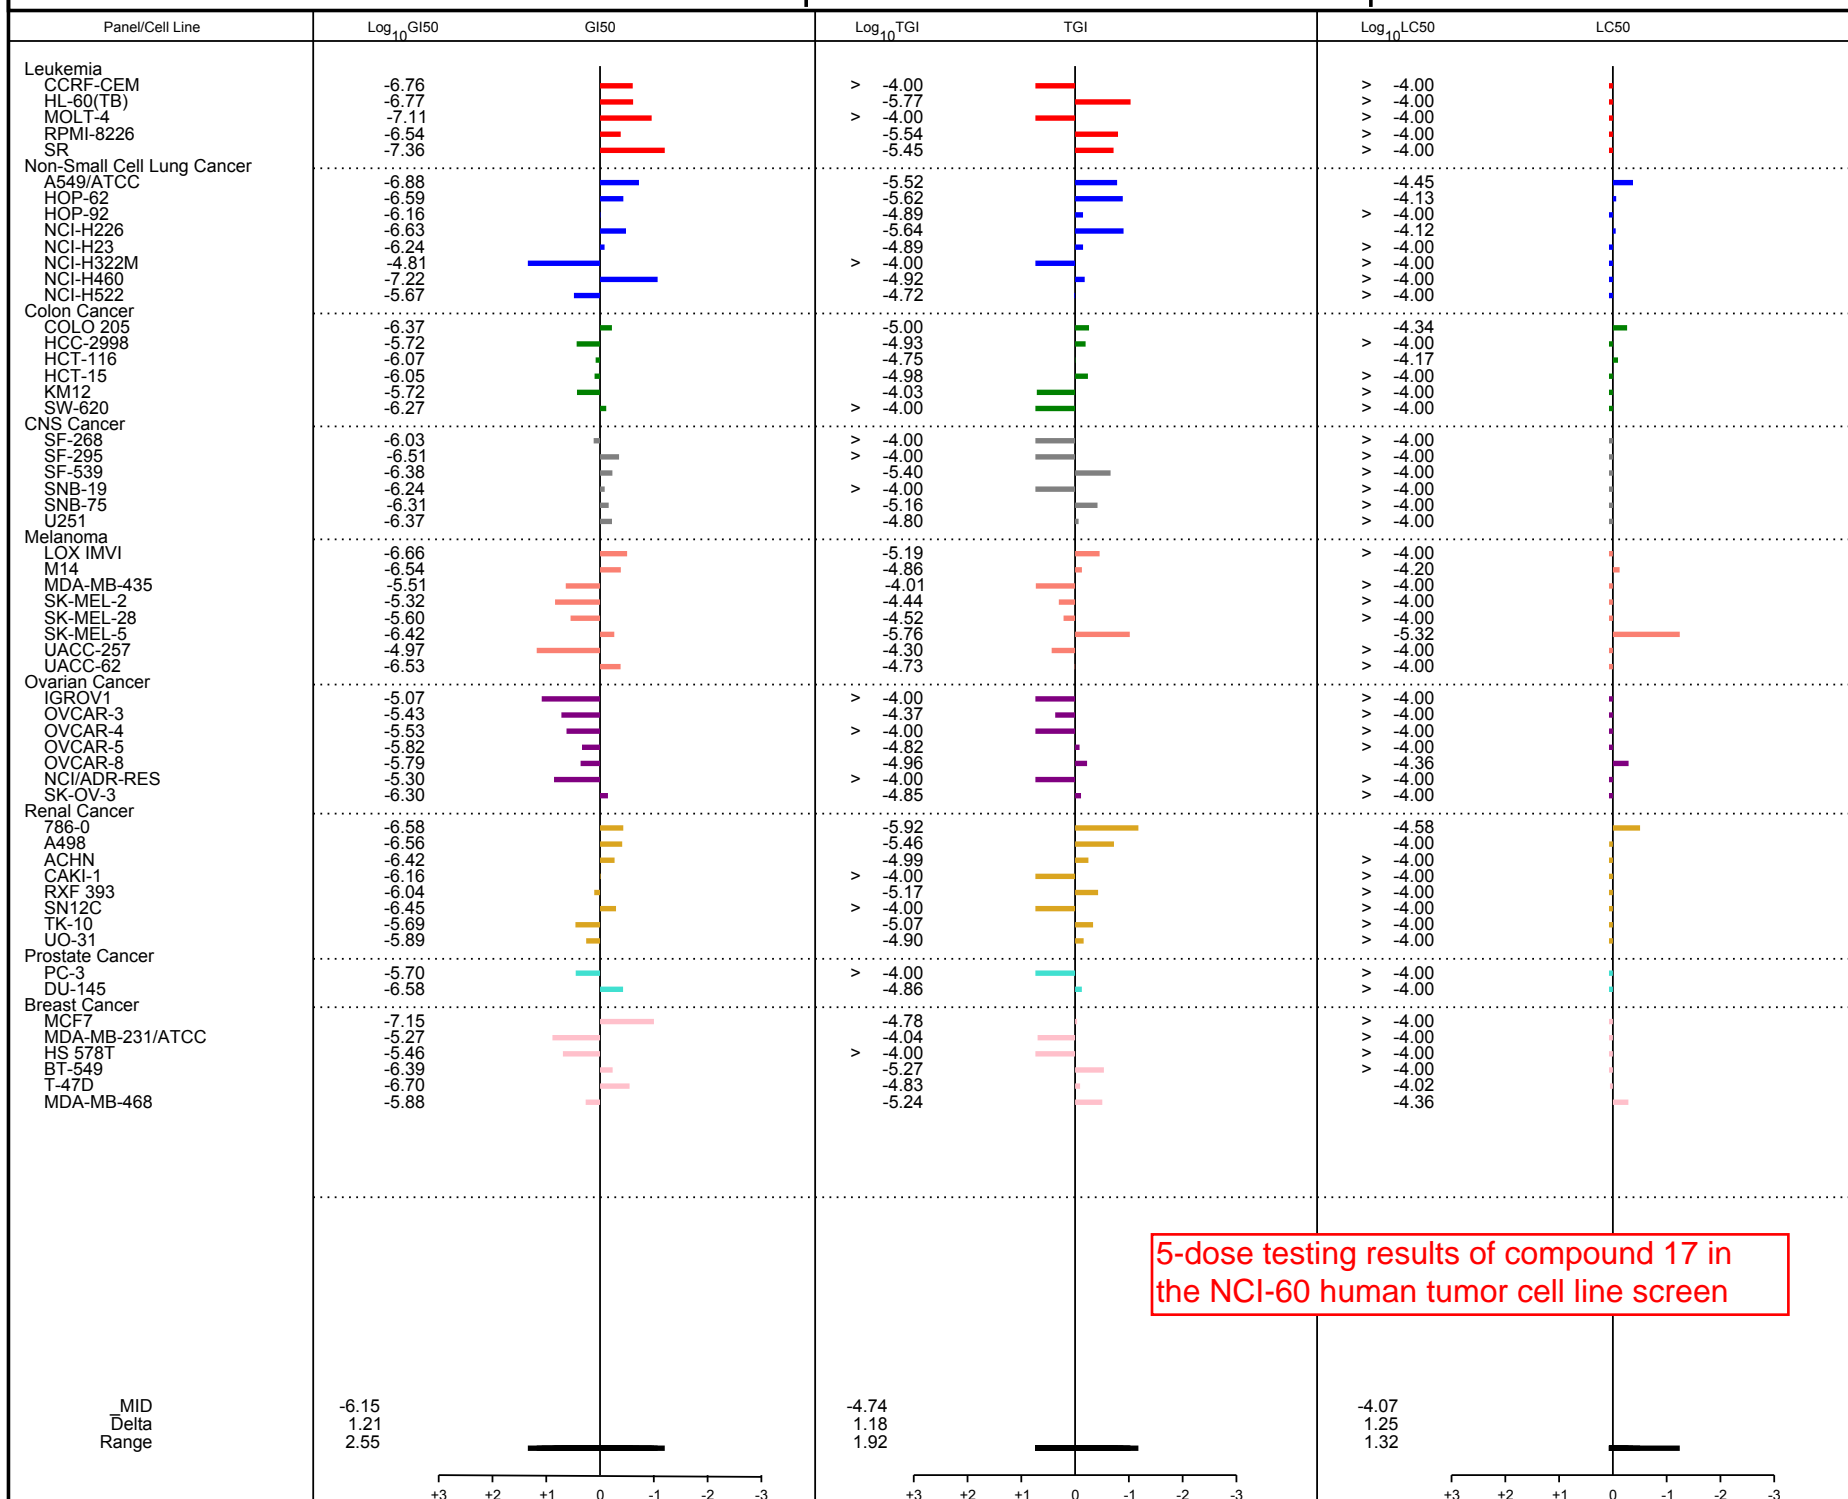

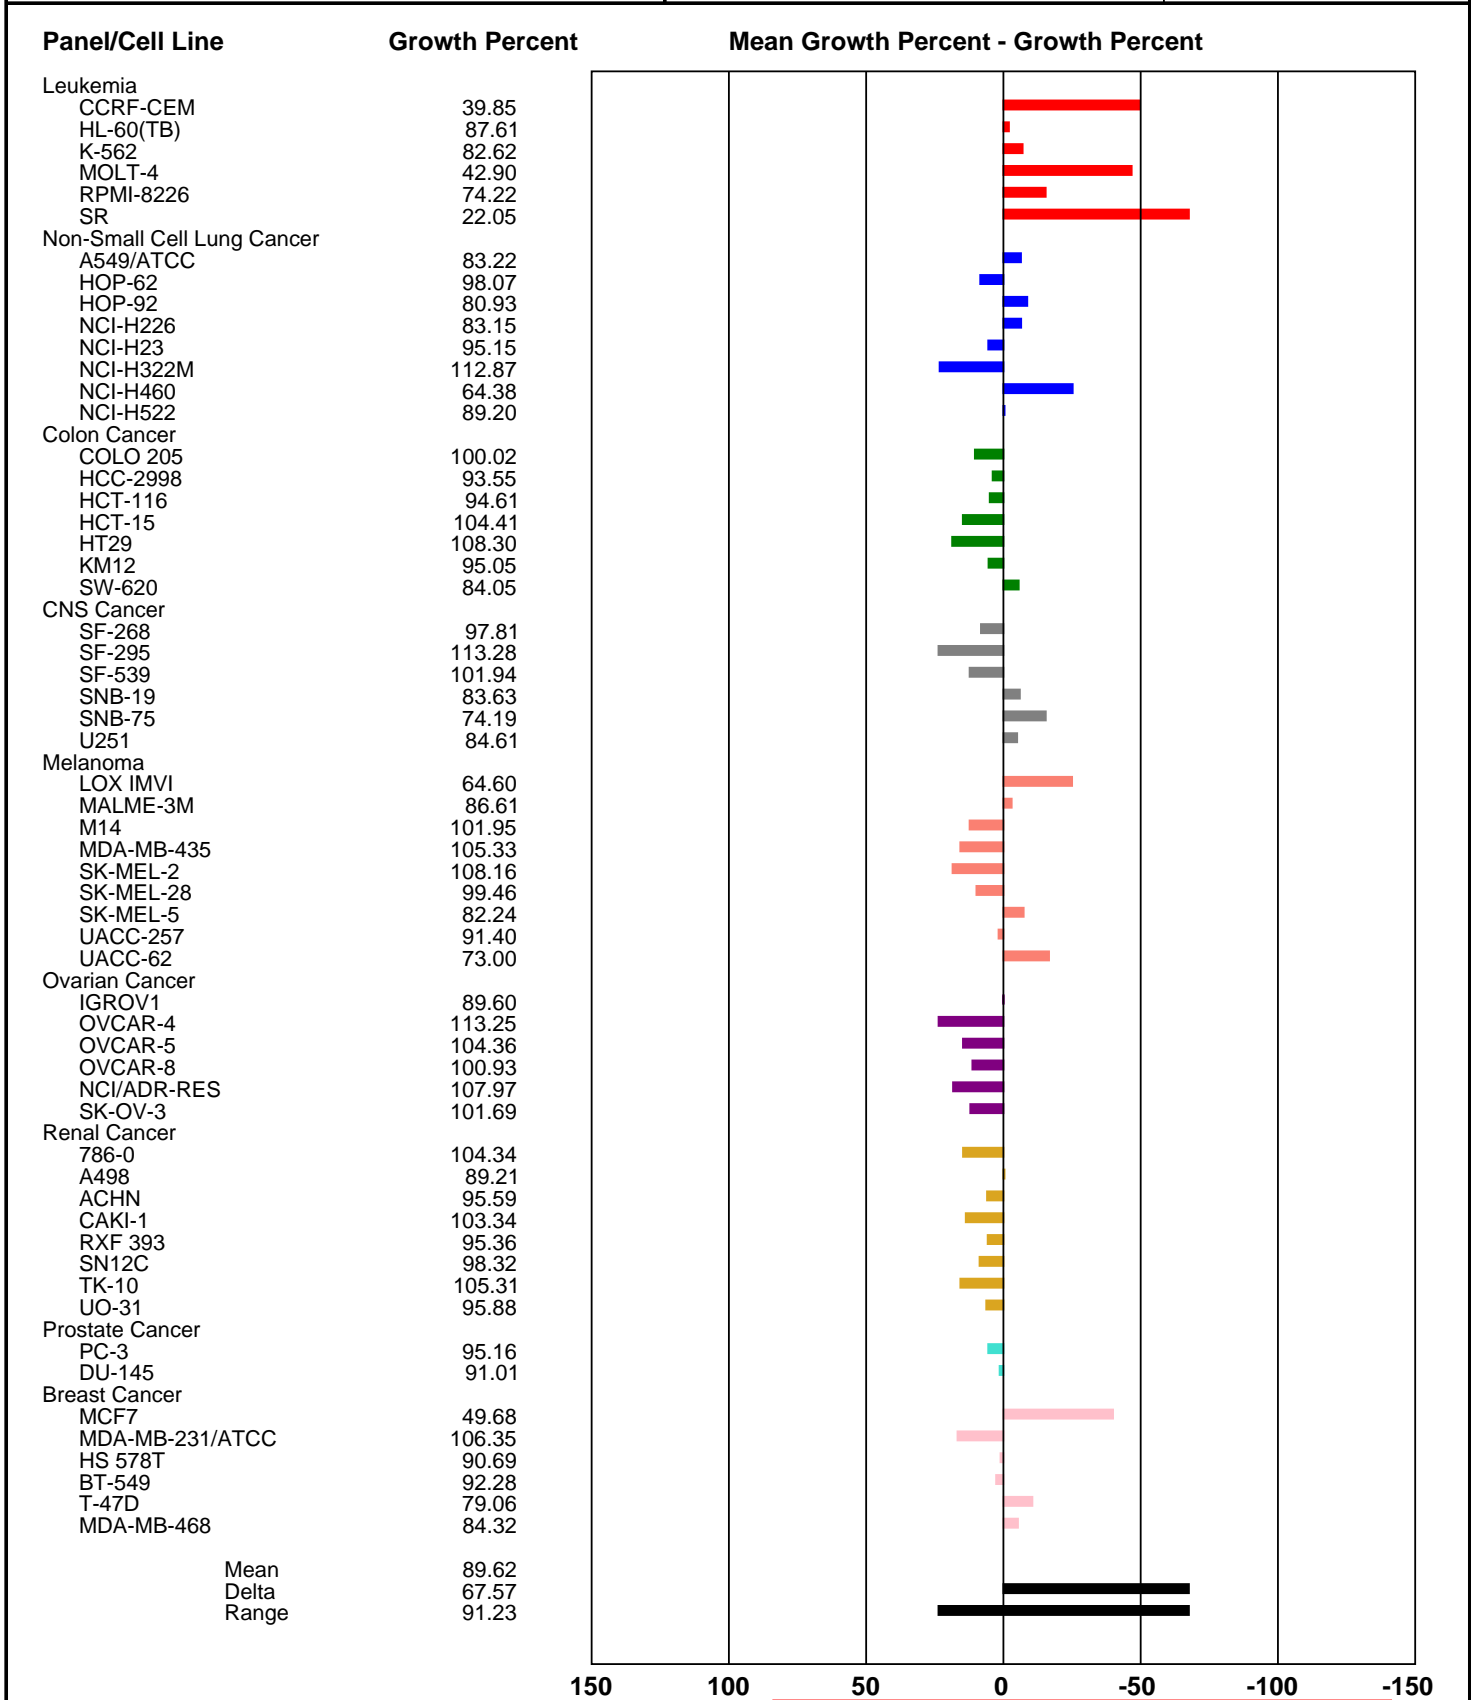

AY138\_NCI\_1305OS04-775517-  
OneDose[1].pdf

1-dose testing results of compound 19 in  
the NCI-60 human tumor cell line screen

SpinWorks 2.5: Sample AY-76 1-H at 300 MHz in CDCl3

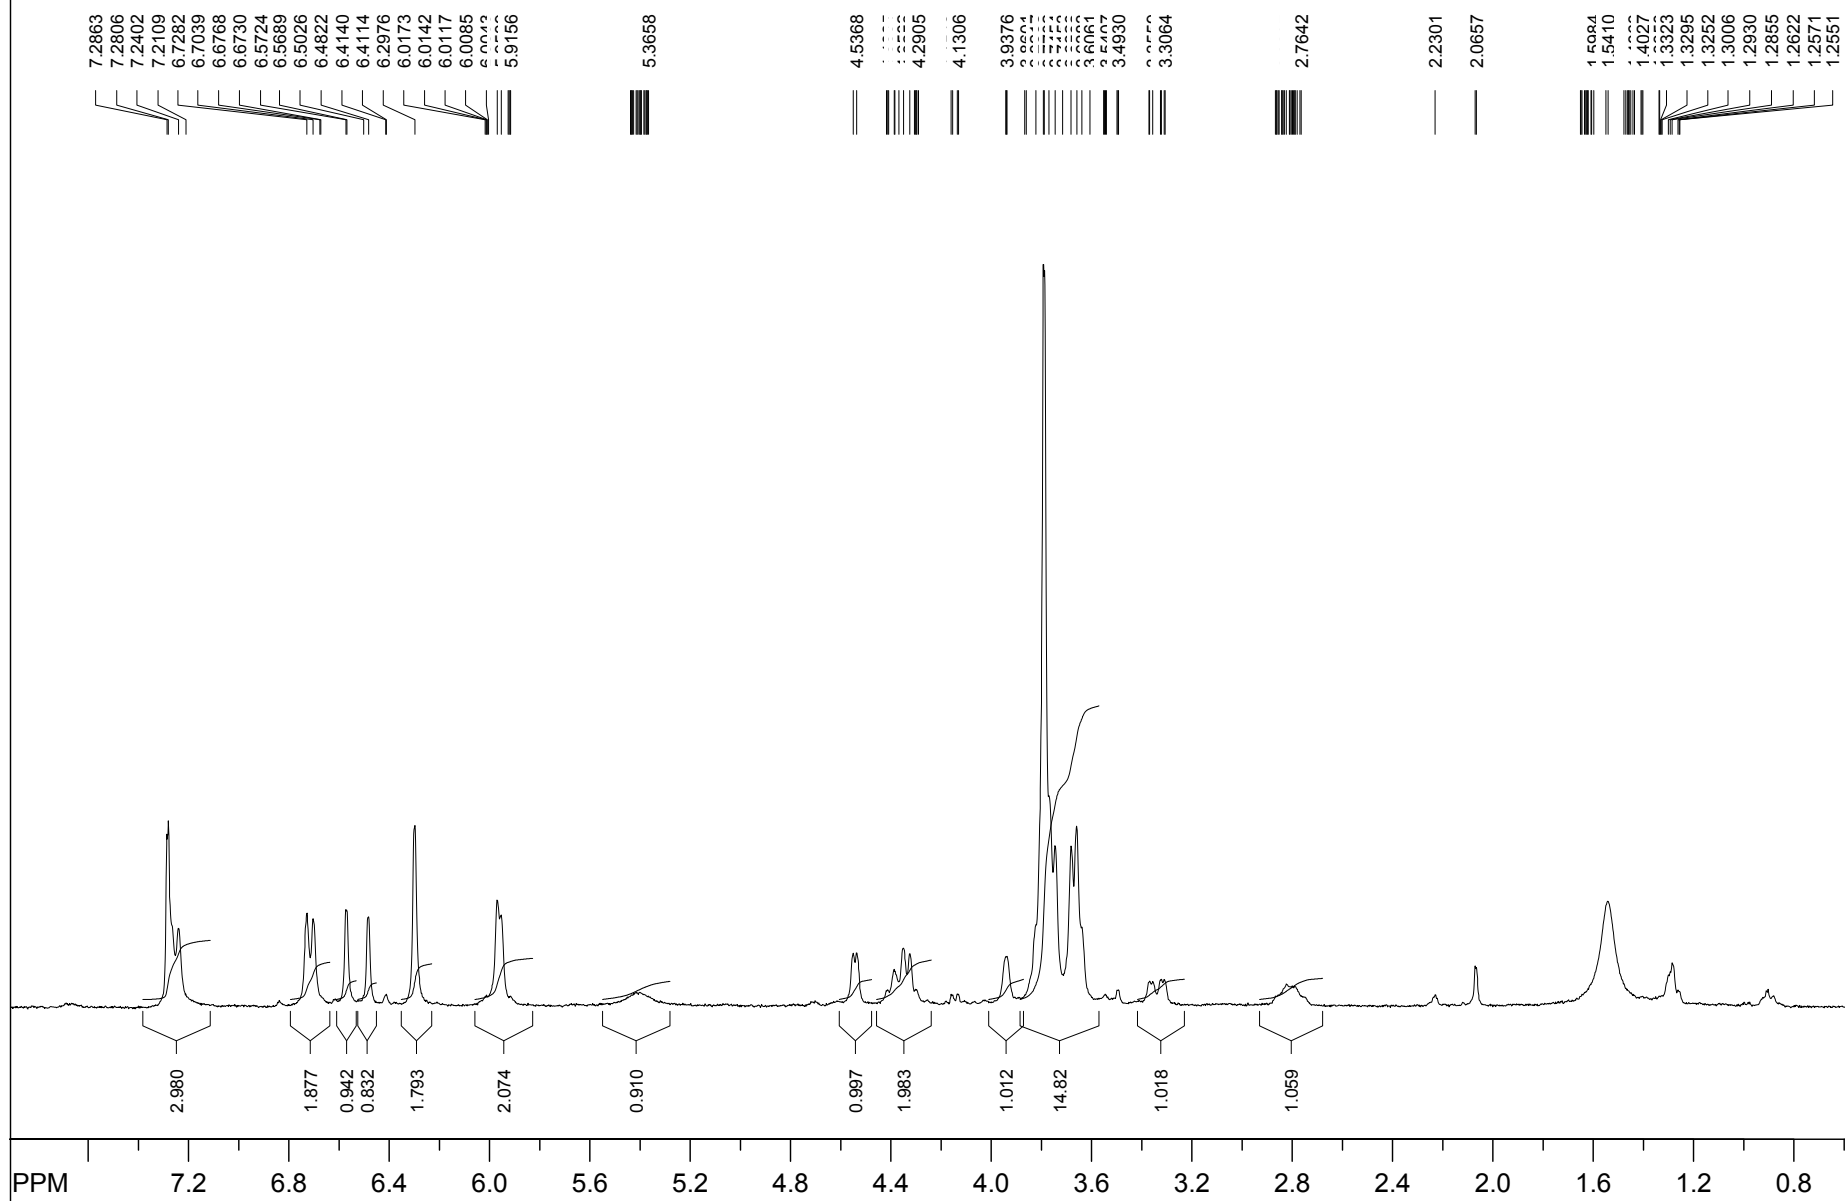

file: C:\Arun\NMR\lc-ay-76\lc-ay-76\1\fid expt: <zg30>  
transmitter freq.: 300.131853 MHz  
time domain size: 32768 points  
width: 6172.84 Hz = 20.567092 ppm = 0.188380 Hz/pt  
number of scans: 16

freq. of 0 ppm: 300.130006 MHz  
processed size: 16384 complex points  
LB: 0.300 GB: 0.0000  
Hz/cm: 87.919 ppm/cm: 0.29293

SpinWorks 2.5: Sample AY-54 1-H at 300 MHz in CDCl3

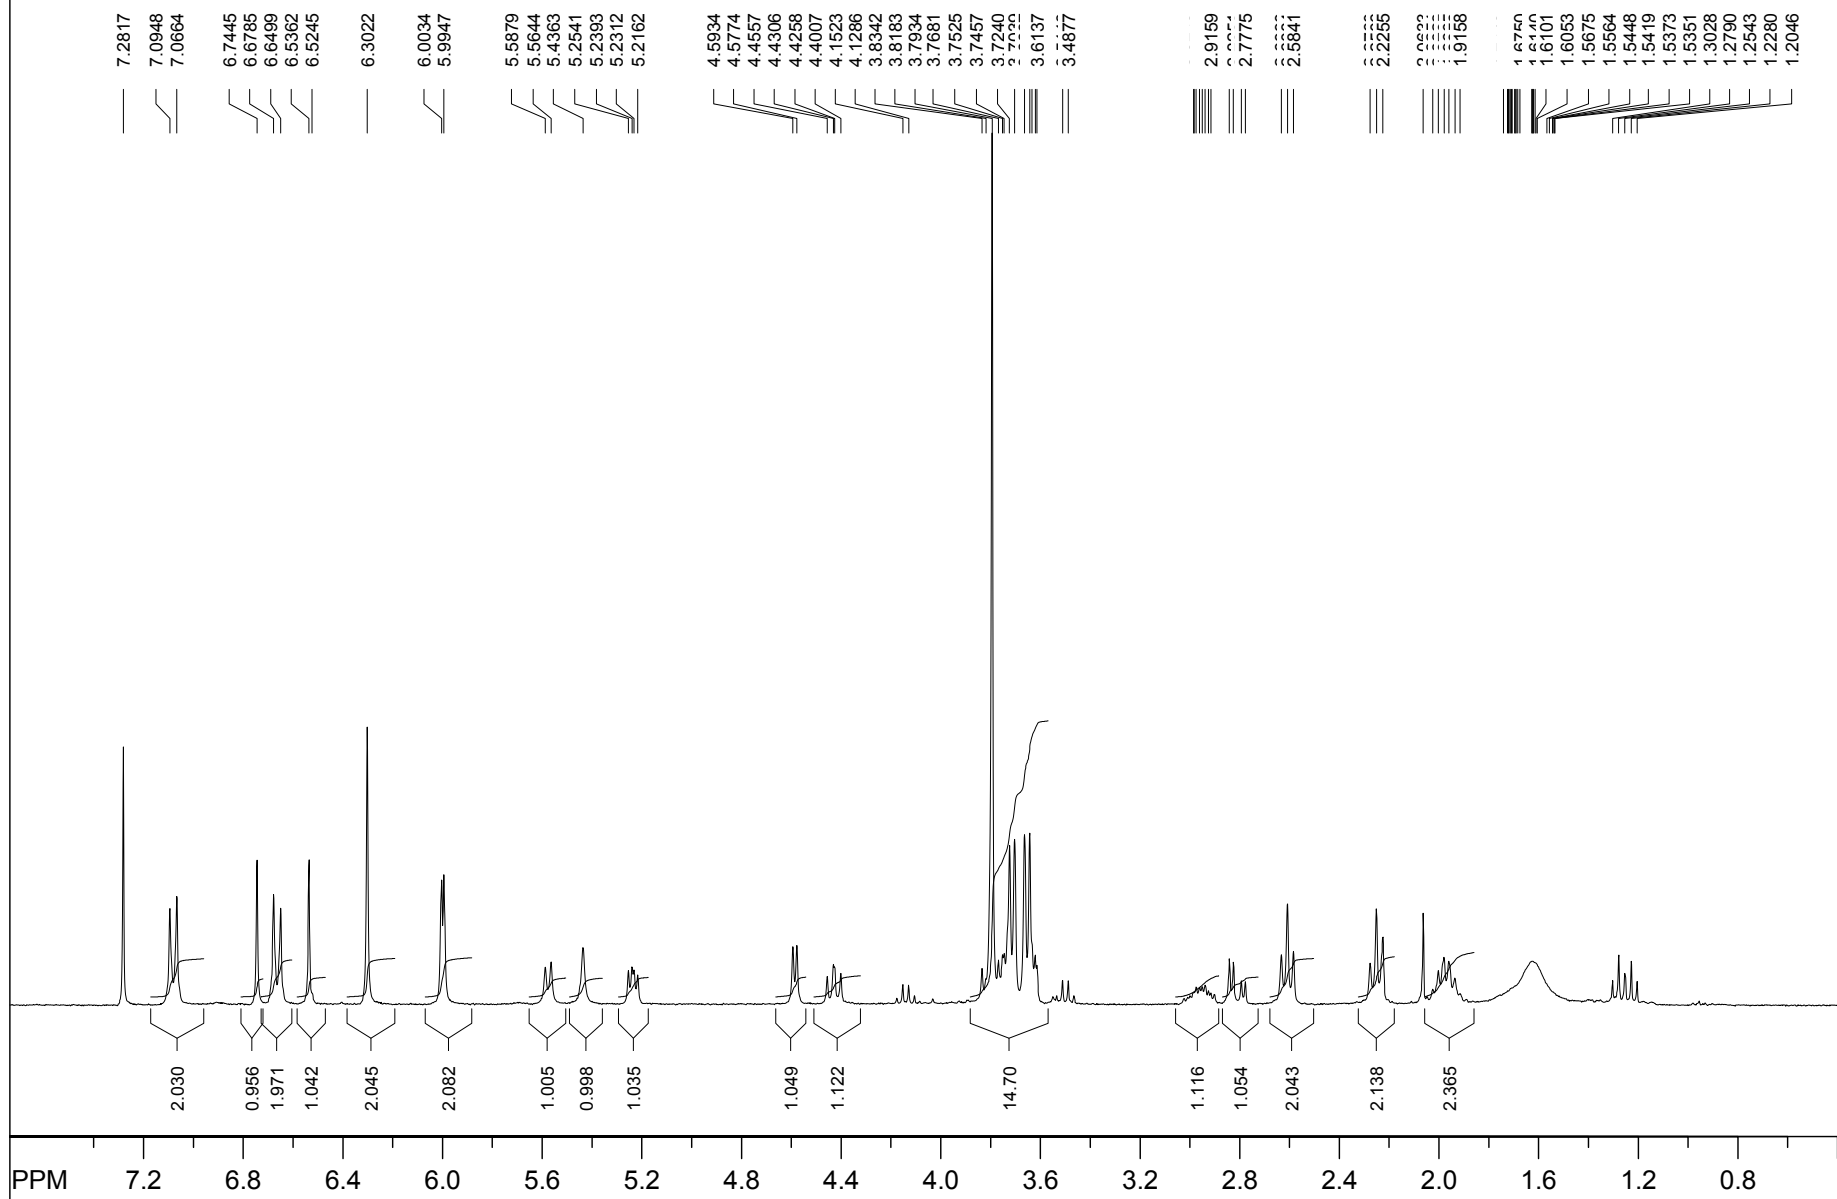

file: C:\Arun\NMR\lc-ay-54\lc-ay-54\1\fid exp: <zg30>  
 transmitter freq.: 300.131853 MHz  
 time domain size: 32768 points  
 width: 6172.84 Hz = 20.567092 ppm = 0.188380 Hz/pt  
 number of scans: 16

freq. of 0 ppm: 300.130006 MHz  
 processed size: 16384 complex points  
 LB: 0.300 GB: 0.0000  
 Hz/cm: 88.402 ppm/cm: 0.29455



SpinWorks 2.5: Sample AY-68 1-H at 300 MHz in dms0-d6

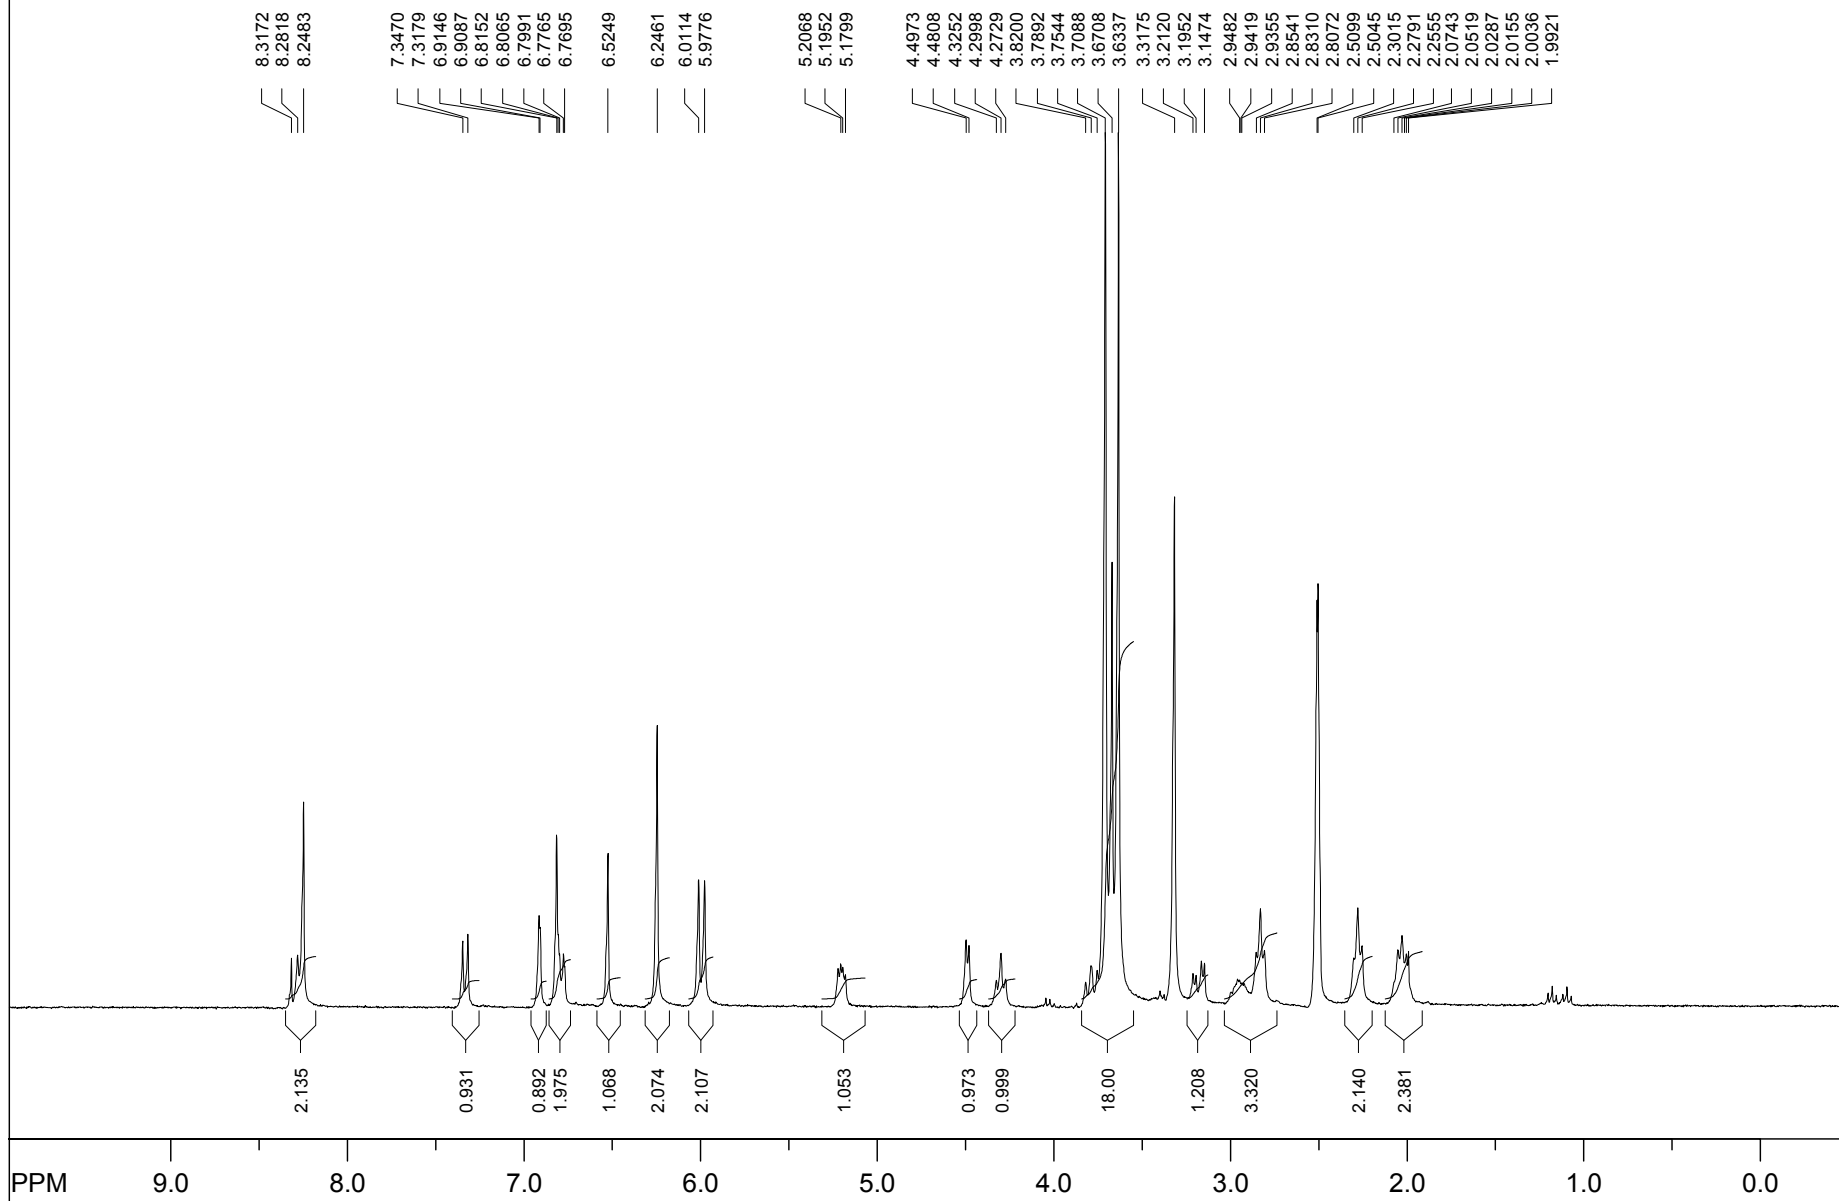

file: C:\Arun\NMR\lc-ay-68\lc-ay-68\1\fid exp: <zg30>  
transmitter freq.: 300.131853 MHz  
time domain size: 32768 points  
width: 6172.84 Hz = 20.567092 ppm = 0.188380 Hz/pt  
number of scans: 16

freq. of 0 ppm: 300.130000 MHz  
processed size: 16384 complex points  
LB: 0.300 GB: 0.0000  
Hz/cm: 125.040 ppm/cm: 0.41662

SpinWorks 2.5: Sample AY-64 1-H at 300 MHz in CDCl3

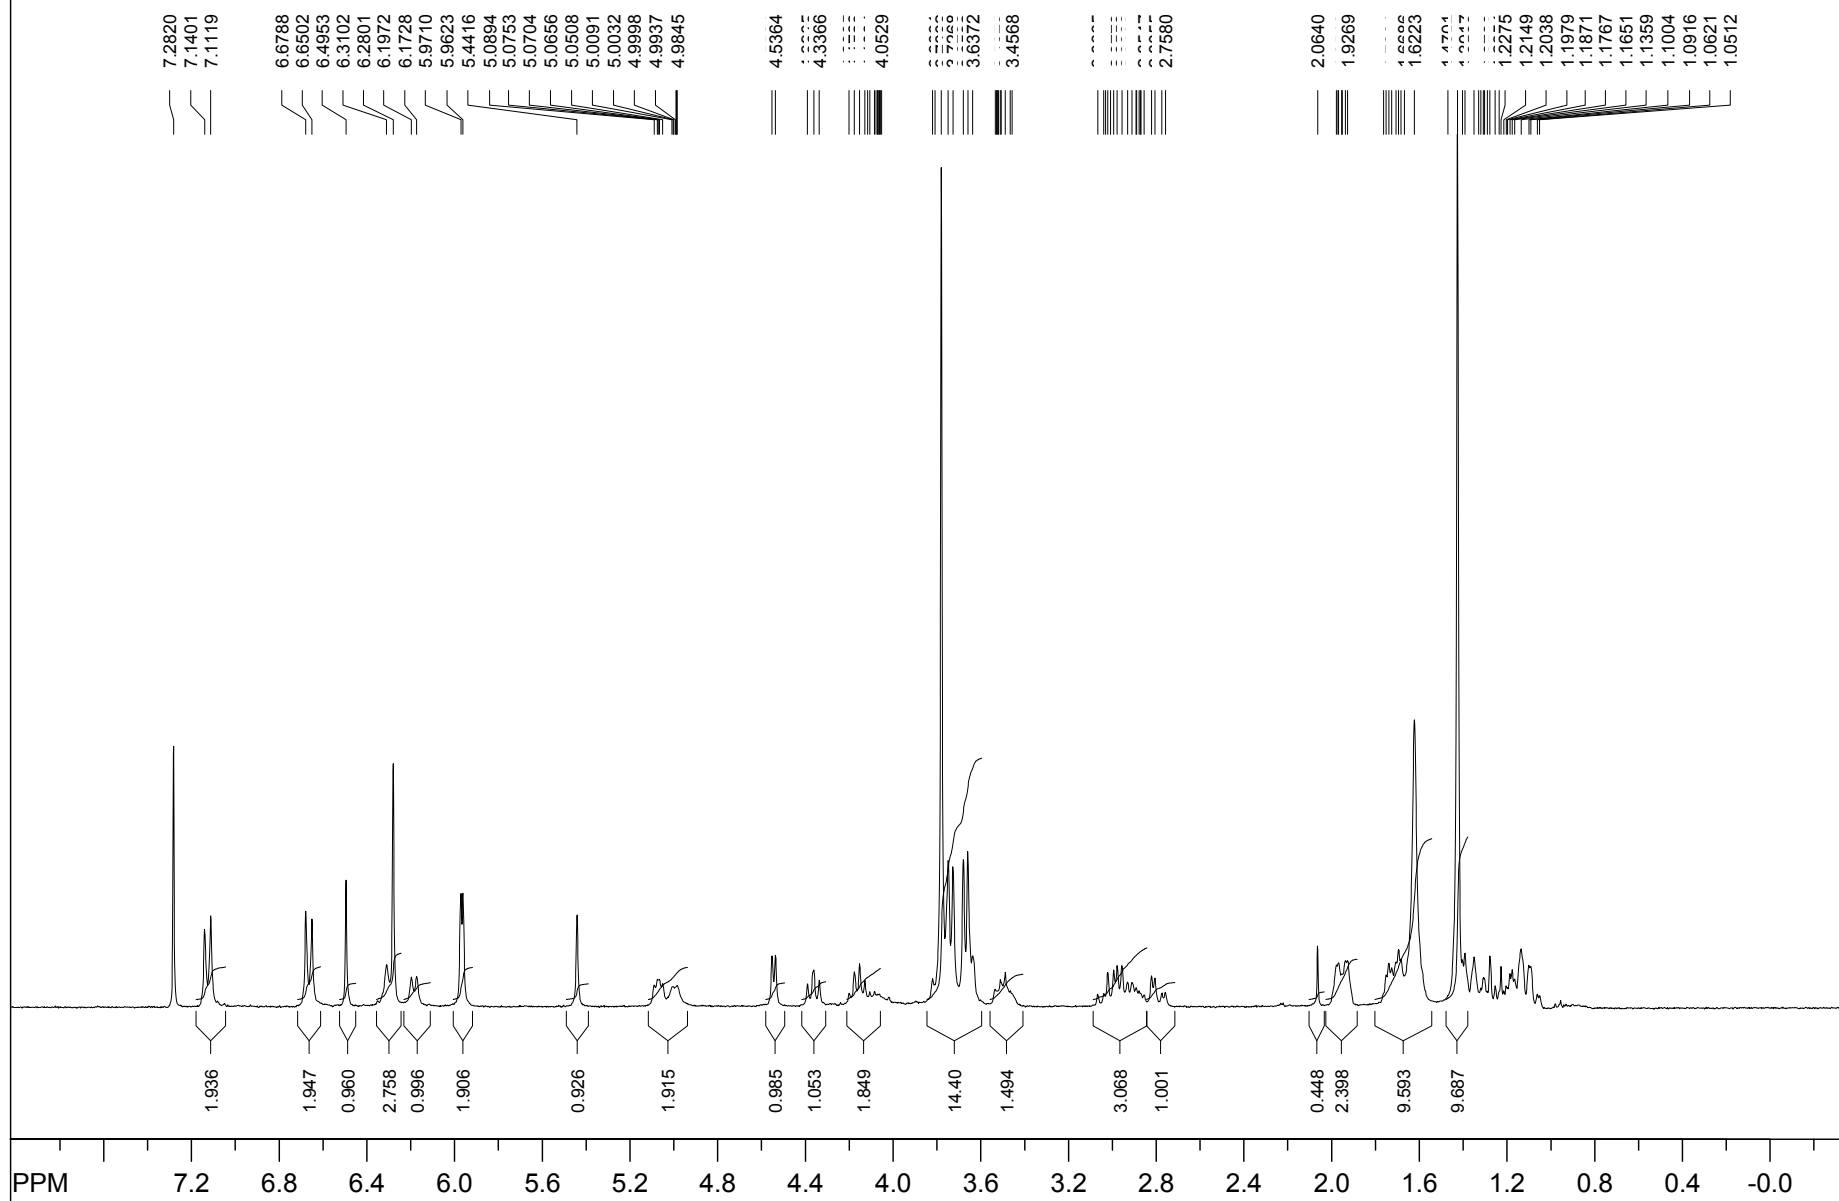

file: C:\Arun\NMR\lc-ay-64\lc-ay-64\1\fid exp: <zg30>  
transmitter freq.: 300.131853 MHz  
time domain size: 32768 points  
width: 6172.84 Hz = 20.567092 ppm = 0.188380 Hz/pt  
number of scans: 16

freq. of 0 ppm: 300.130006 MHz  
processed size: 16384 complex points  
LB: 0.000 GB: 0.0000  
Hz/cm: 100.582 ppm/cm: 0.33513

SpinWorks 2.5: Sample AY-70 1-H at 300 MHz in dms0-d6

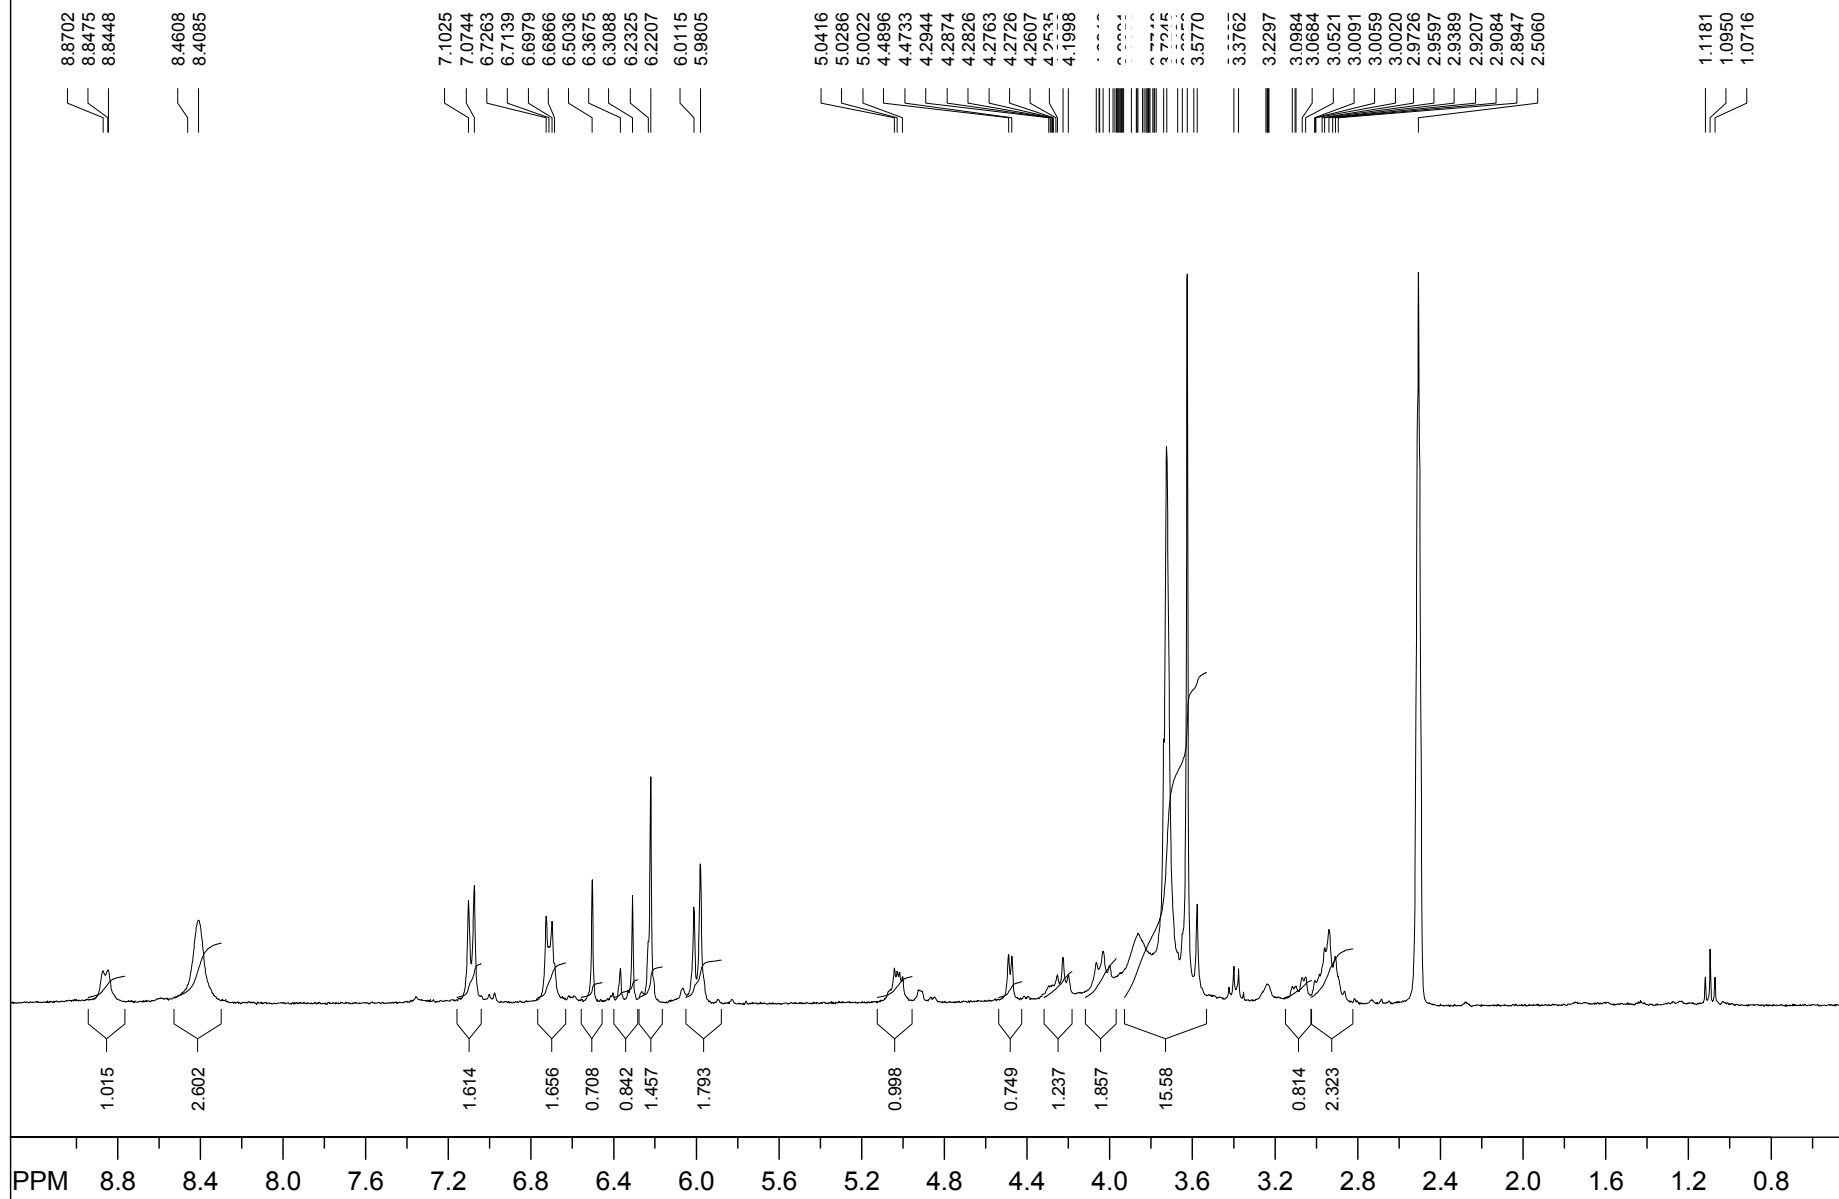

file: C:\Arun\NMR\lc-ay-70\lc-ay-70\1\fid exp: <zg30>  
 transmitter freq.: 300.131853 MHz  
 time domain size: 32768 points  
 width: 6172.84 Hz = 20.567092 ppm = 0.188380 Hz/pt  
 number of scans: 16

freq. of 0 ppm: 300.130000 MHz  
 processed size: 16384 complex points  
 LB: 0.300 GB: 0.0000  
 Hz/cm: 106.701 ppm/cm: 0.35551

SpinWorks 2.5: Sample AY130 1-H at 300 MHz in CDCl3

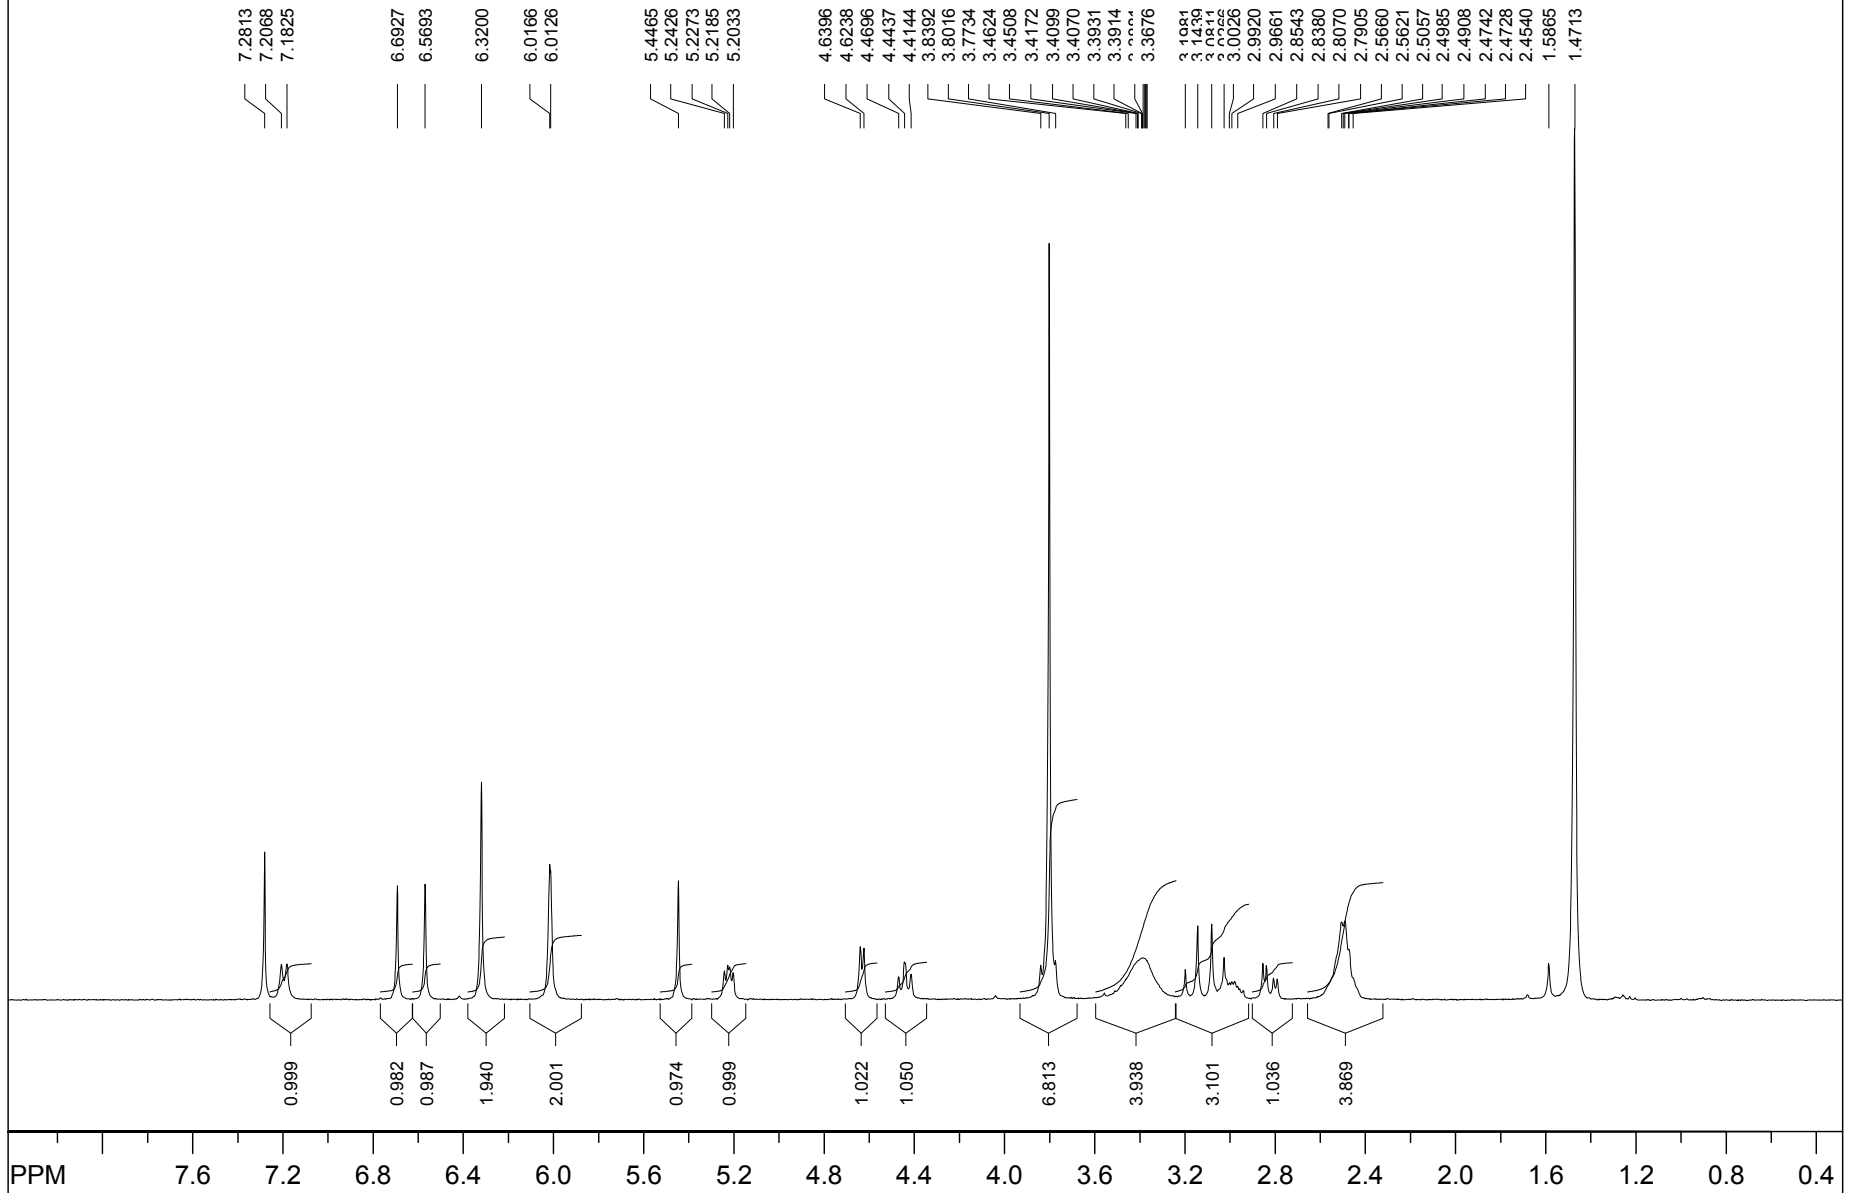

file: C:\Arun\NMR\ay-130\1\fid exp: <zg30>  
 transmitter freq.: 300.131853 MHz  
 time domain size: 32768 points  
 width: 6172.84 Hz = 20.567092 ppm = 0.188380 Hz/pt  
 number of scans: 16

freq. of 0 ppm: 300.130006 MHz  
 processed size: 16384 complex points  
 LB: 0.300 GB: 0.0000  
 Hz/cm: 97.656 ppm/cm: 0.32538

SpinWorks 2.5: Sample Ay-132 1-H at 300 MHz in CDCl3

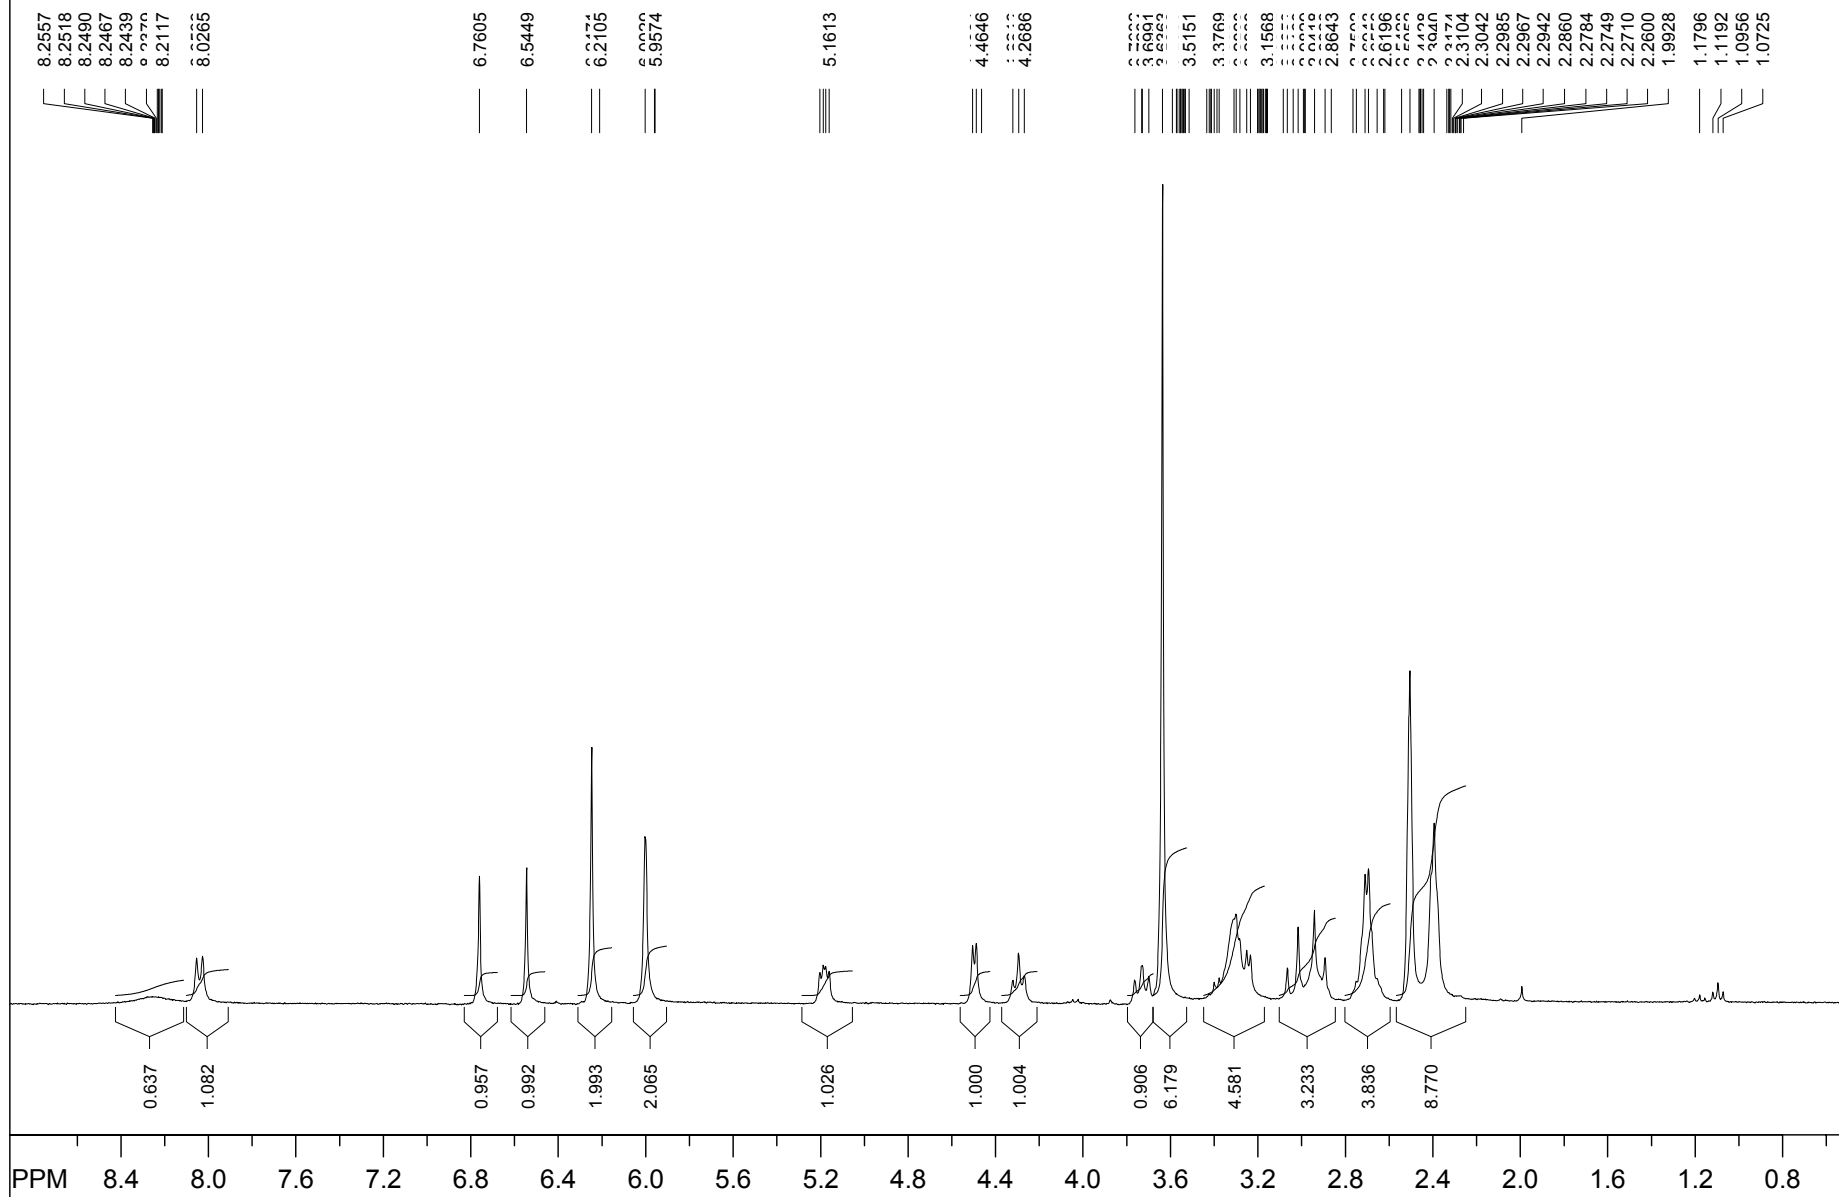

file: C:\Arun\NMR\ay-132\2\fid expt: <zg30>  
transmitter freq.: 300.131853 MHz  
time domain size: 32768 points  
width: 6172.84 Hz = 20.567092 ppm = 0.188380 Hz/pt  
number of scans: 16

freq. of 0 ppm: 300.130000 MHz  
processed size: 16384 complex points  
LB: 0.300 GB: 0.0000  
Hz/cm: 100.582 ppm/cm: 0.33513

SpinWorks 2.5: Sample AY-134 1-H at 300 MHz in CDCl3

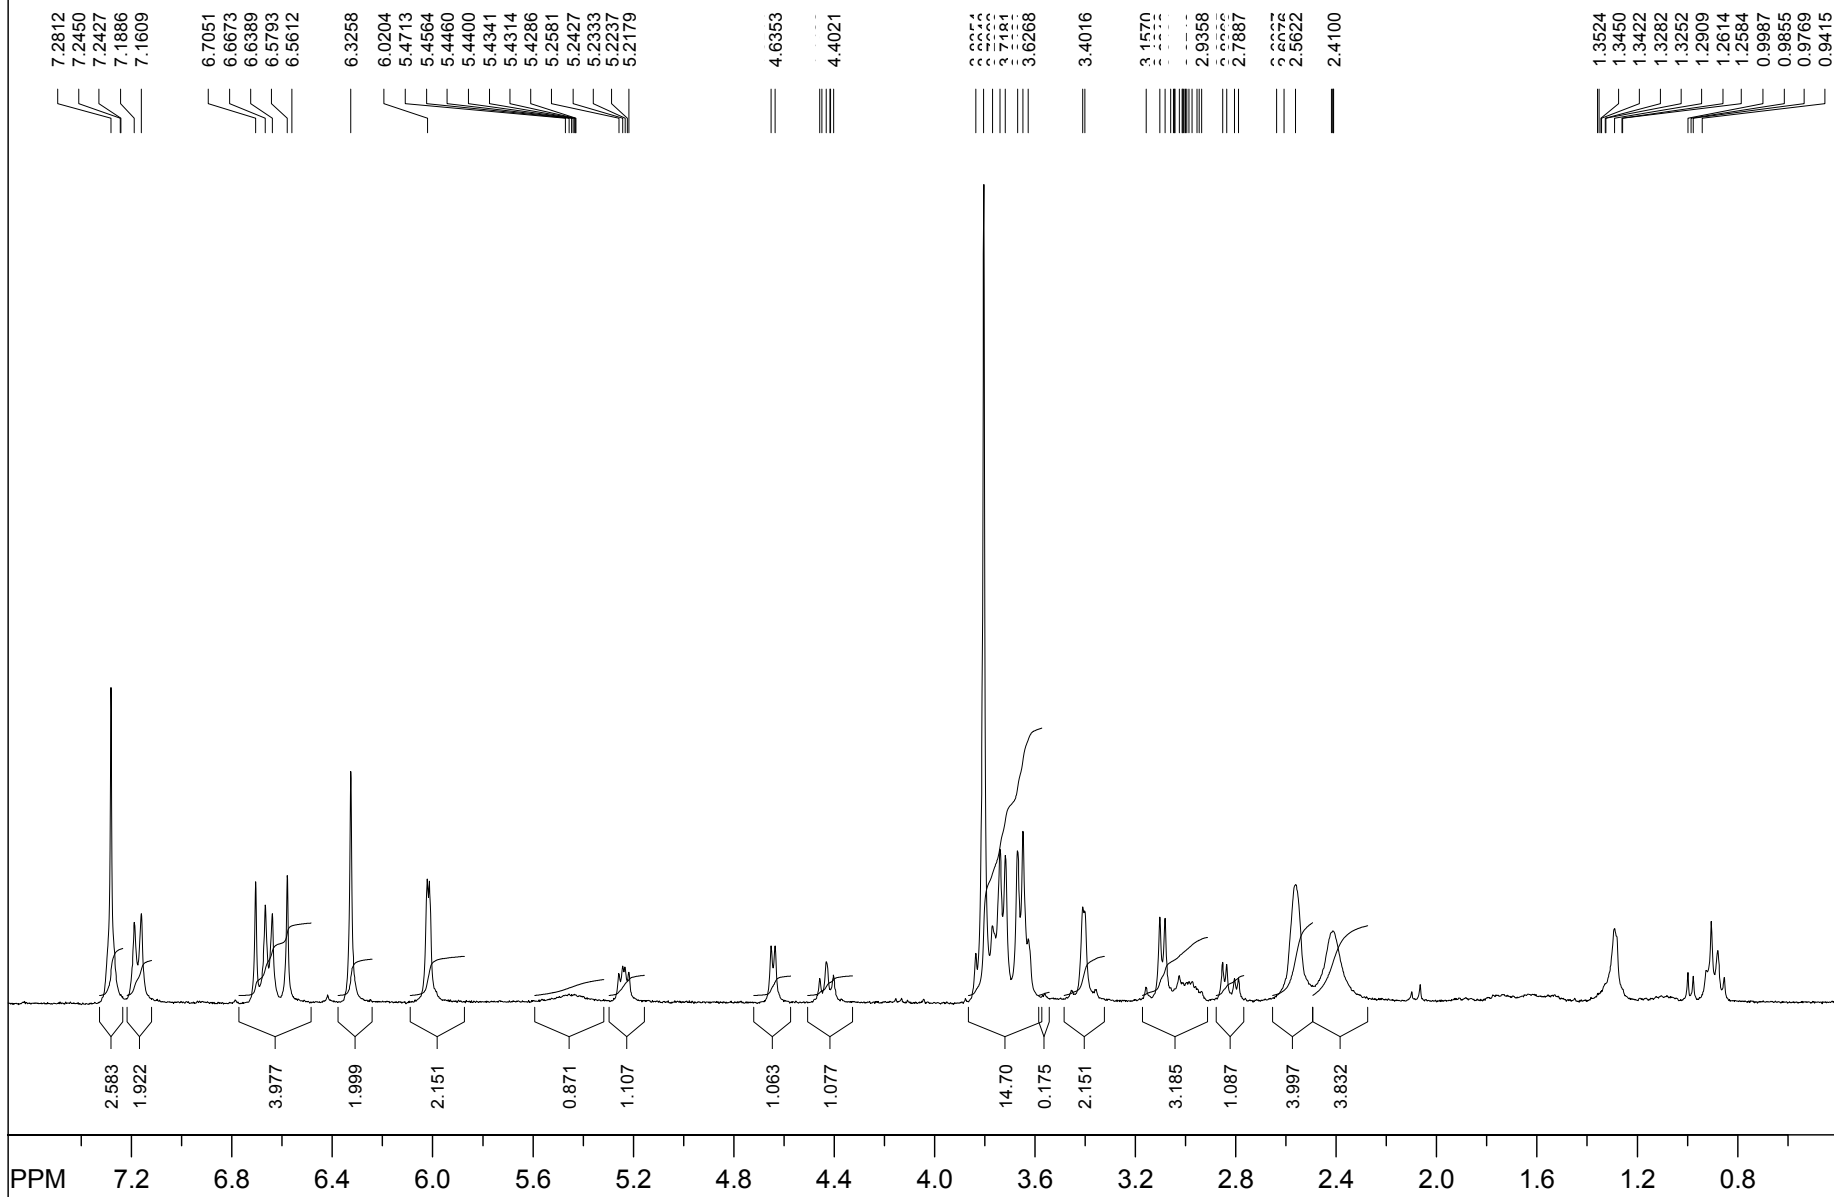

file: C:\Arun\NMR\ay-134\1\fid exp: <zg30>

transmitter freq.: 300.131853 MHz

time domain size: 32768 points

width: 6172.84 Hz = 20.567092 ppm = 0.188380 Hz/pt

number of scans: 16

freq. of 0 ppm: 300.130006 MHz

processed size: 16384 complex points

LB: 0.000 GB: 0.0000

Hz/cm: 87.626 ppm/cm: 0.29196

SpinWorks 2.5: Sample Ay-136 1-H at 300 MHz in CDCl3

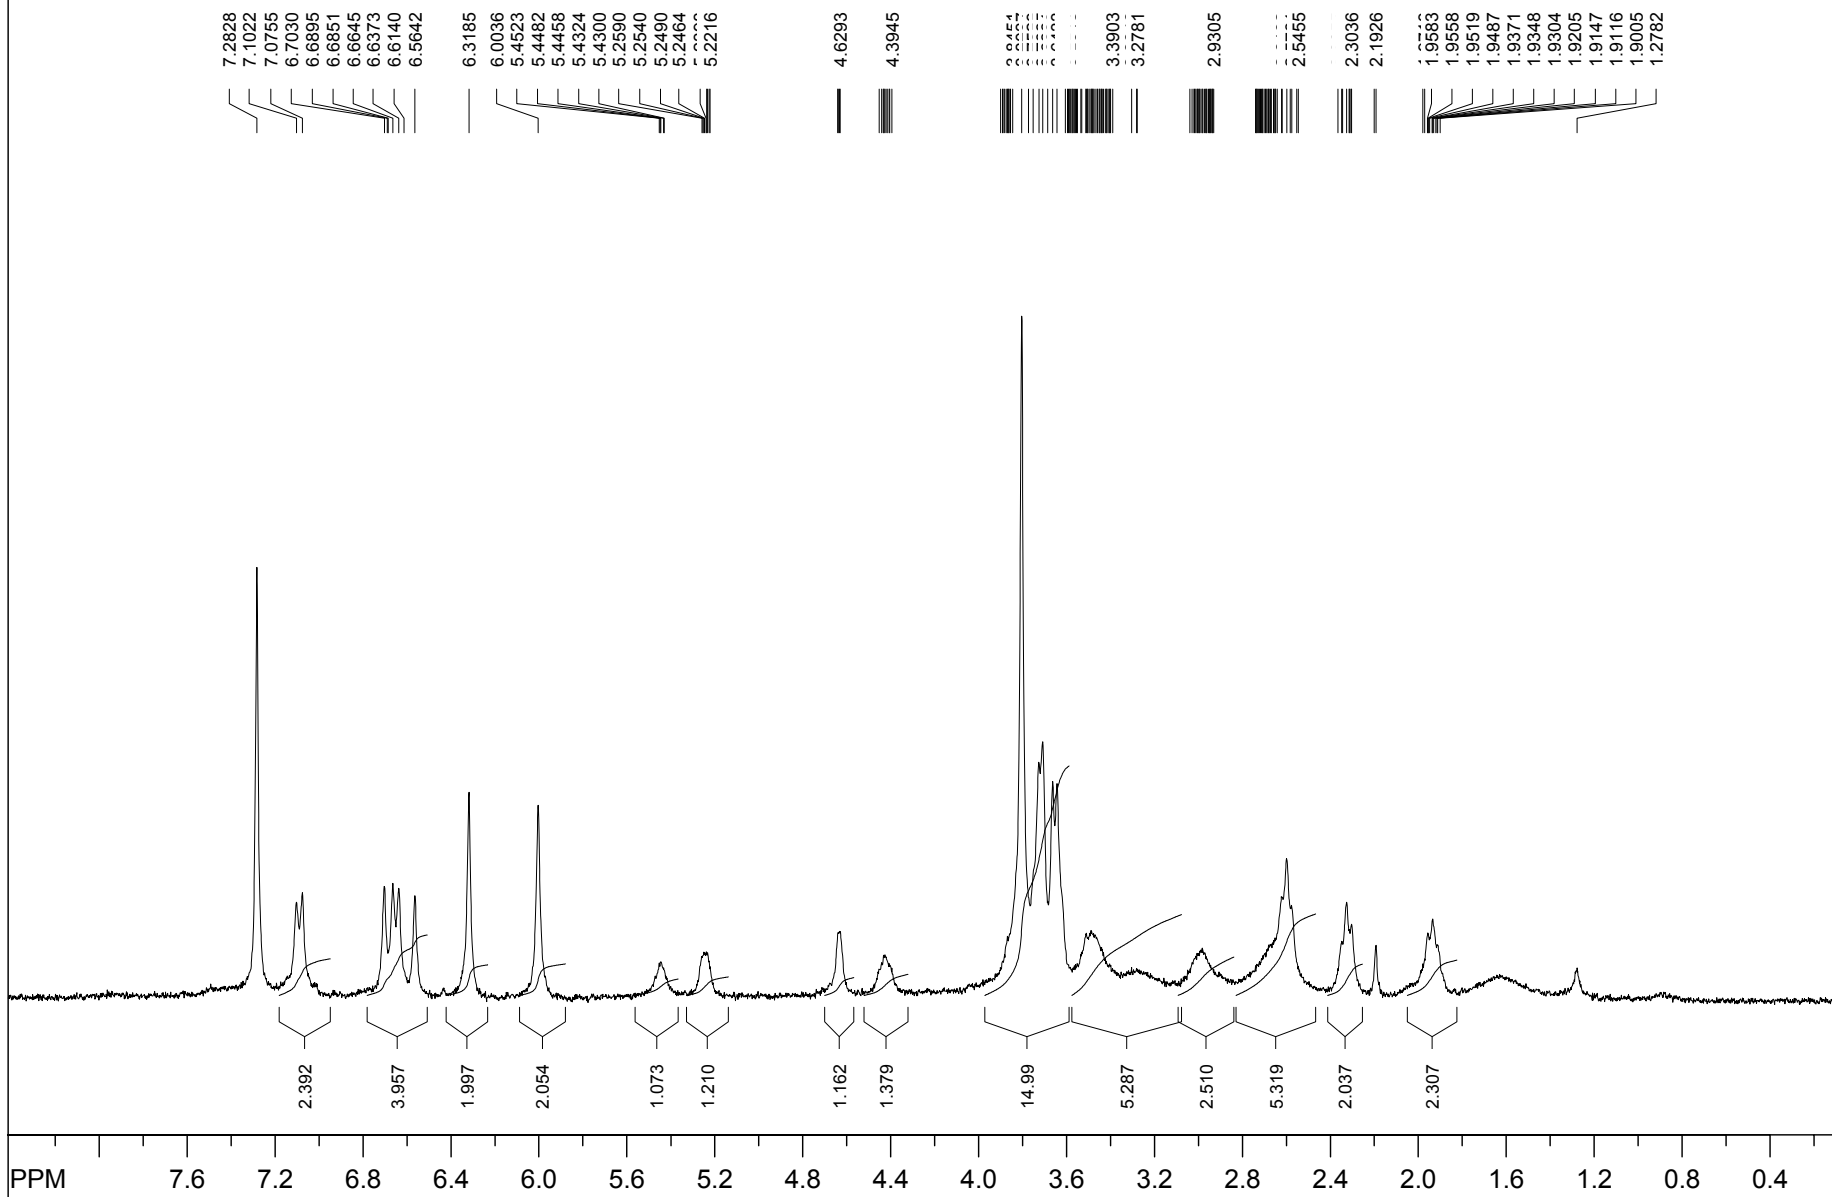

file: C:\Arun\NMR\lh-ay-136\lh-ay-136\1\fid expt: <zg30>  
 transmitter freq.: 300.131853 MHz  
 time domain size: 32768 points  
 width: 6172.84 Hz = 20.567092 ppm = 0.188380 Hz/pt  
 number of scans: 16

freq. of 0 ppm: 300.130006 MHz  
 processed size: 16384 complex points  
 LB: 0.000 GB: 0.0000  
 Hz/cm: 100.032 ppm/cm: 0.33329

SpinWorks 2.5: Sample AY-138 1-H at 300 MHz in CDCl3

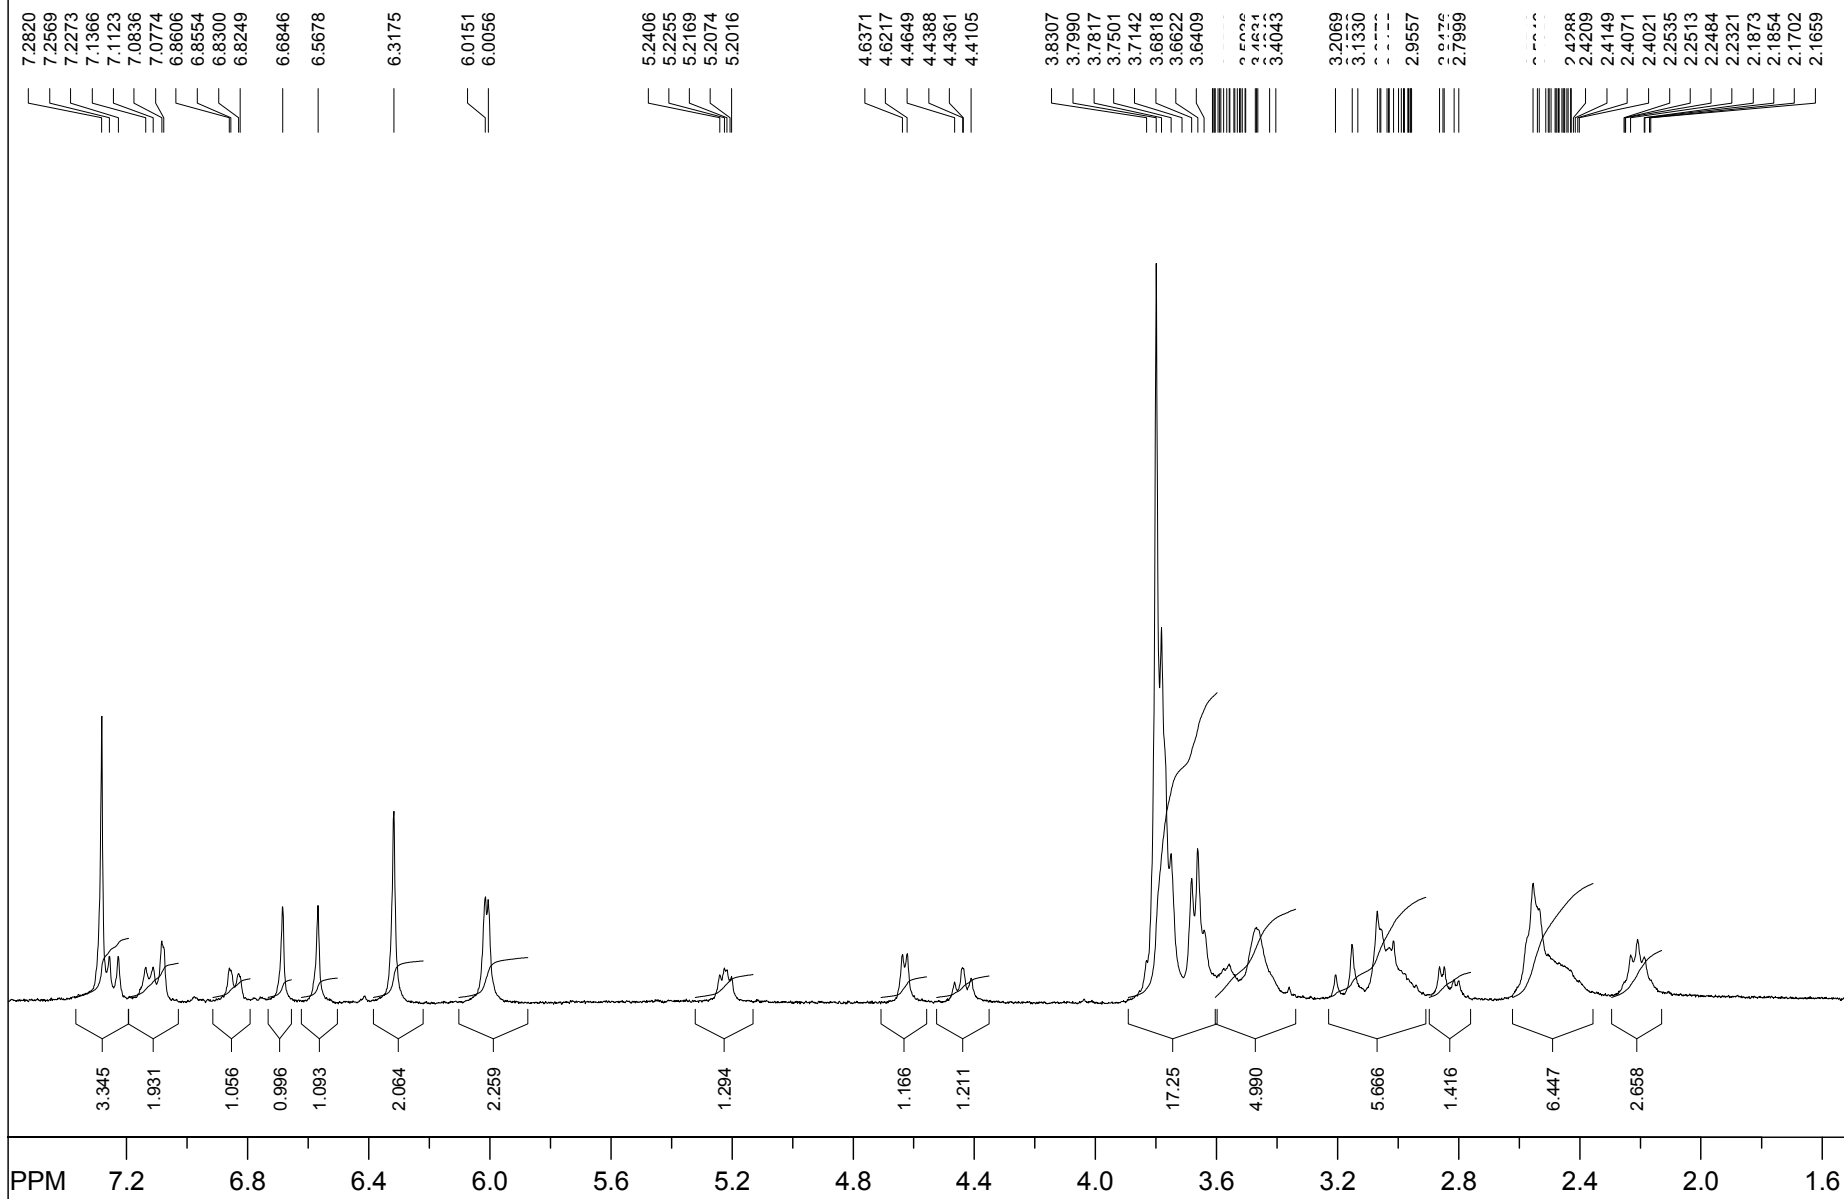

file: C:\Arun\NMR\bh-ay-138\bh-ay-138\1\fid exp: <zg30>  
 transmitter freq.: 300.131853 MHz  
 time domain size: 32768 points  
 width: 6172.84 Hz = 20.567092 ppm = 0.188380 Hz/pt  
 number of scans: 16

freq. of 0 ppm: 300.130006 MHz  
 processed size: 16384 complex points  
 LB: 0.000 GB: 0.0000  
 Hz/cm: 72.841 ppm/cm: 0.24270



SpinWorks 2.5: Sample AY-76 13-C nmr in CDCl3

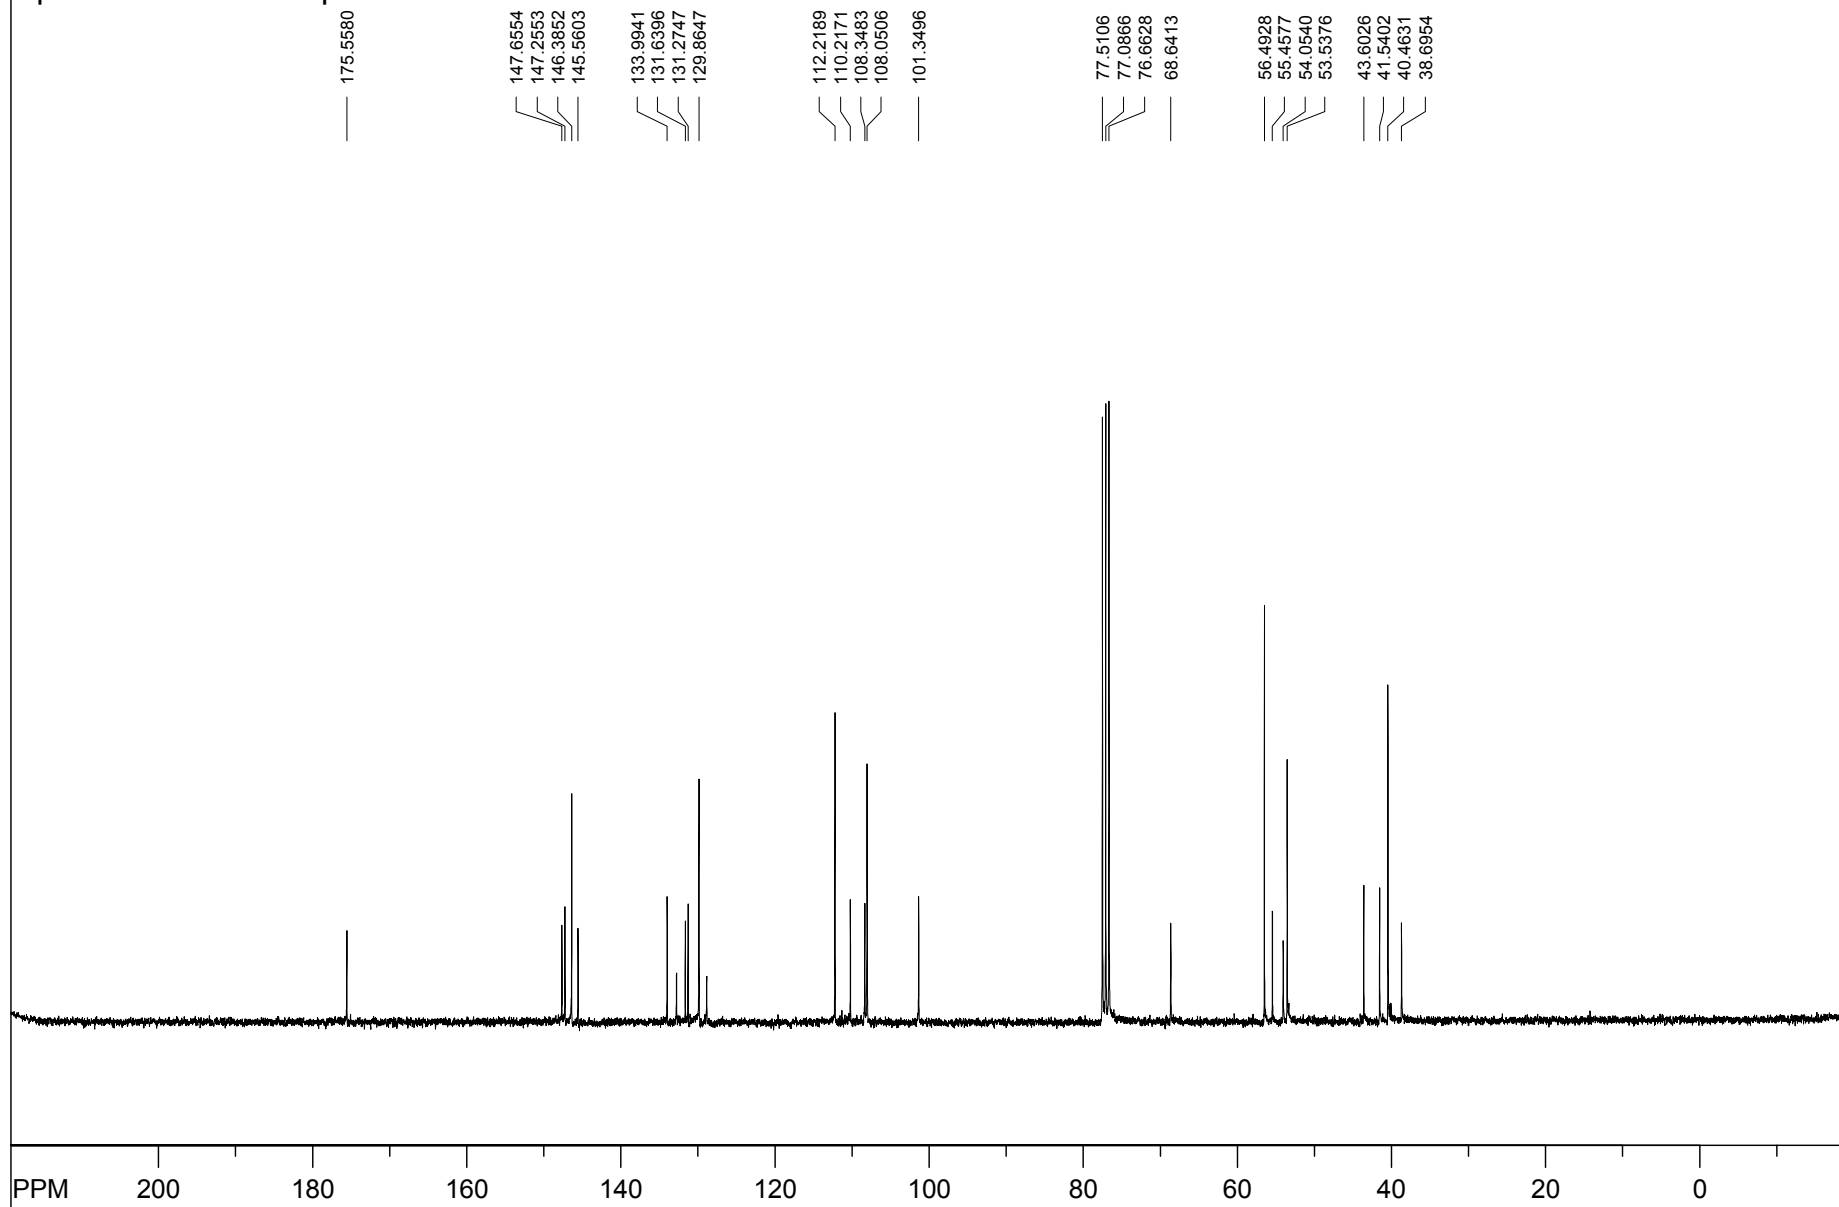

file: C:\Arun\NMR\lh-ay-76\lh-ay-76\1\fid exp: <zpgg30>  
transmitter freq.: 75.475295 MHz  
time domain size: 65536 points  
width: 17985.61 Hz = 238.297995 ppm = 0.274439 Hz/pt  
number of scans: 1024

freq. of 0 ppm: 75.467749 MHz  
processed size: 32768 complex points  
LB: 0.000 GB: 0.0000  
Hz/cm: 719.353 ppm/cm: 9.53097

SpinWorks 2.5: Sample Ay-54 13-C in CDCl3

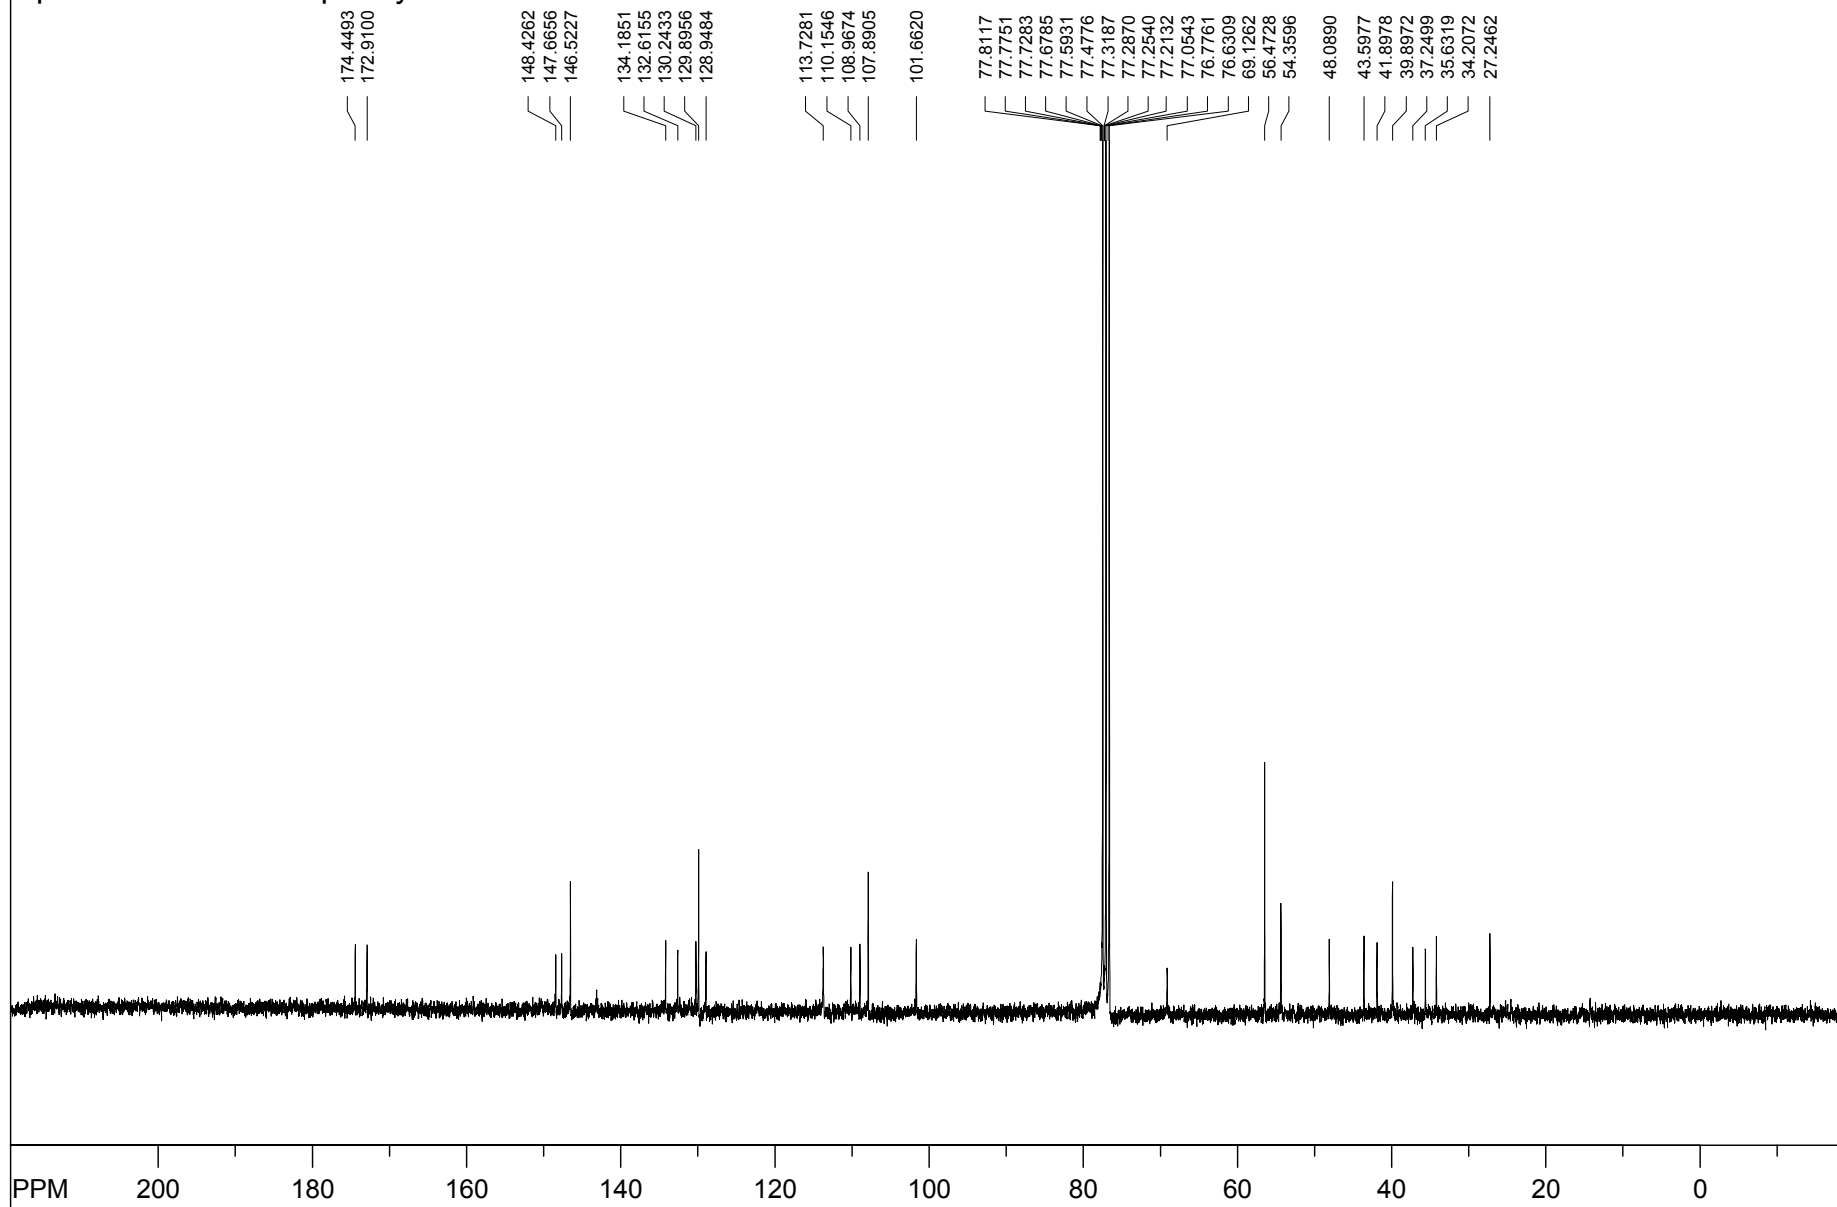

file: C:\Arun\NMR\bh-ay-54.zip 13c\bh-ay-54\1fid expt: <zpgg30>  
transmitter freq.: 75.475295 MHz  
time domain size: 65536 points  
width: 17985.61 Hz = 238.297995 ppm = 0.274439 Hz/pt  
number of scans: 1024

freq. of 0 ppm: 75.467749 MHz  
processed size: 32768 complex points  
LB: 0.300 GB: 0.0000  
Hz/cm: 719.353 ppm/cm: 9.53097

SpinWorks 2.5: Sample AY-68A 13-C in dmso-d6

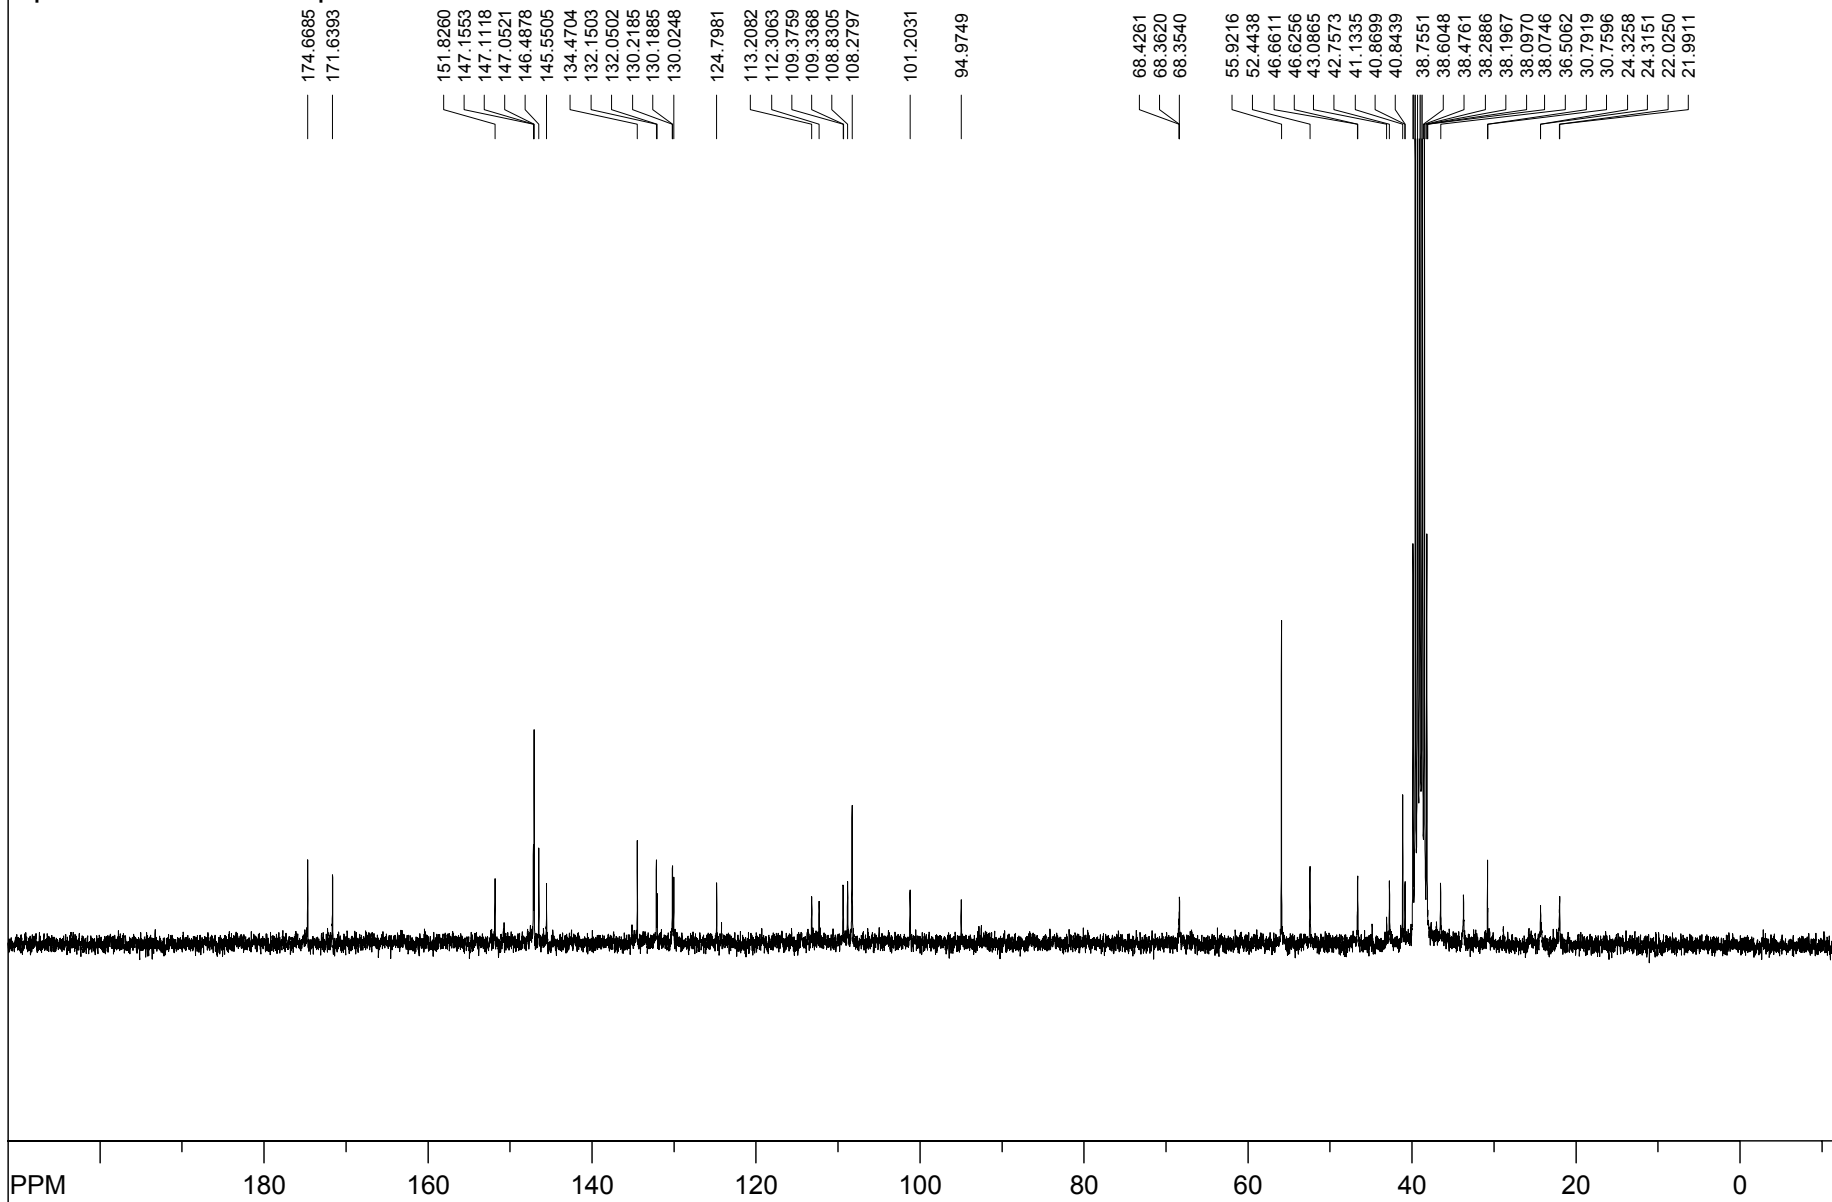

file: C:\Arun\NMR\lh-ay-68a\lh-ay-68a\1\fid expt: <zpgp30>  
 transmitter freq.: 75.475295 MHz  
 time domain size: 65536 points  
 width: 17985.61 Hz = 238.297995 ppm = 0.274439 Hz/pt  
 number of scans: 1024

freq. of 0 ppm: 75.467787 MHz  
 processed size: 32768 complex points  
 LB: 0.300 GB: 0.0000  
 Hz/cm: 674.393 ppm/cm: 8.93529

SpinWorks 2.5: Sample AY-70C in dms0-d6 on |Avance 500

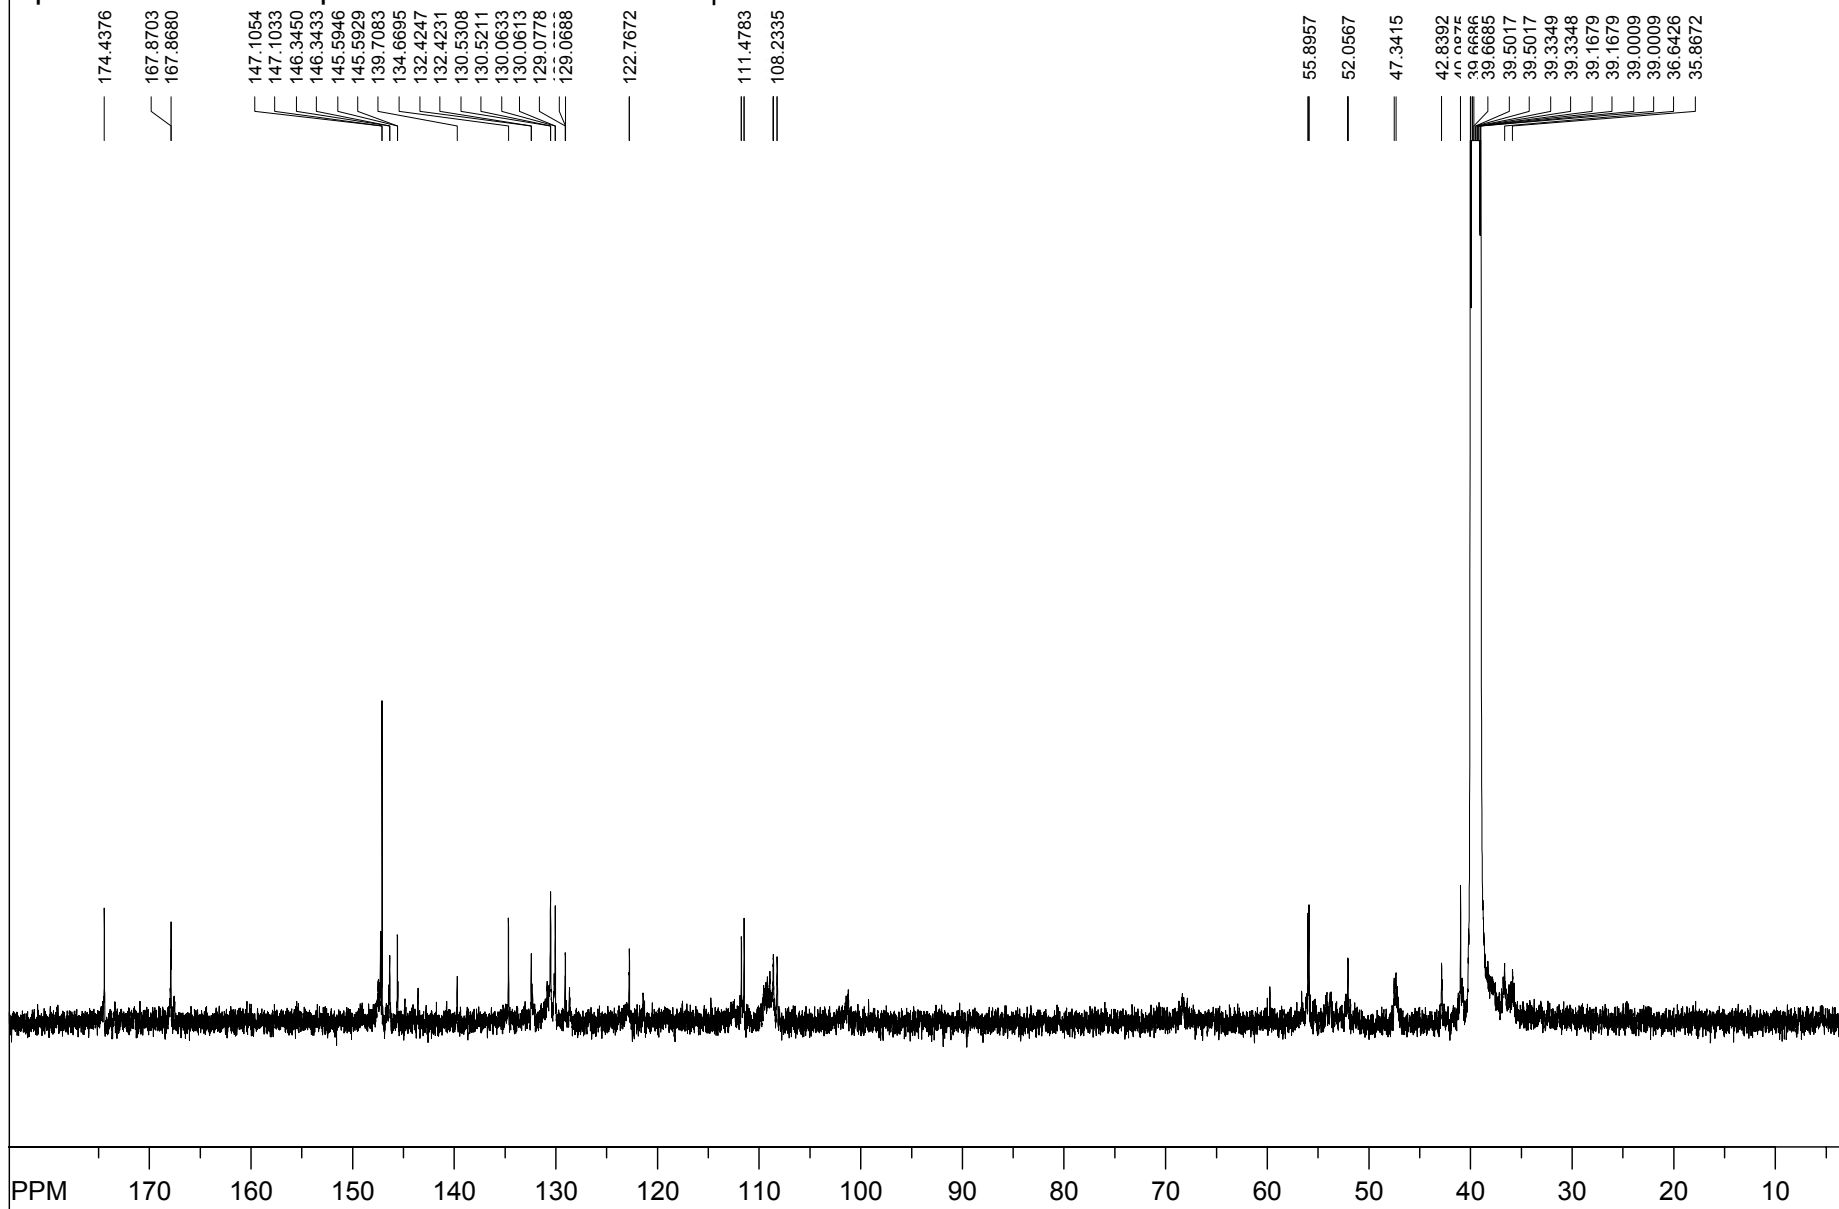

file: C:\Arun\NMR\ay-70c\ay-70c\2\fid expt: <zgpg30>  
transmitter freq.: 125.770364 MHz  
time domain size: 65536 points  
width: 29761.90 Hz = 236.636866 ppm = 0.454131 Hz/pt  
number of scans: 4096

freq. of 0 ppm: 125.757852 MHz  
processed size: 32768 complex points  
LB: 1.000 GB: 0.0000  
Hz/cm: 910.589 ppm/cm: 7.24009

SpinWorks 2.5: Sample AY-130 13-C in CDCl3

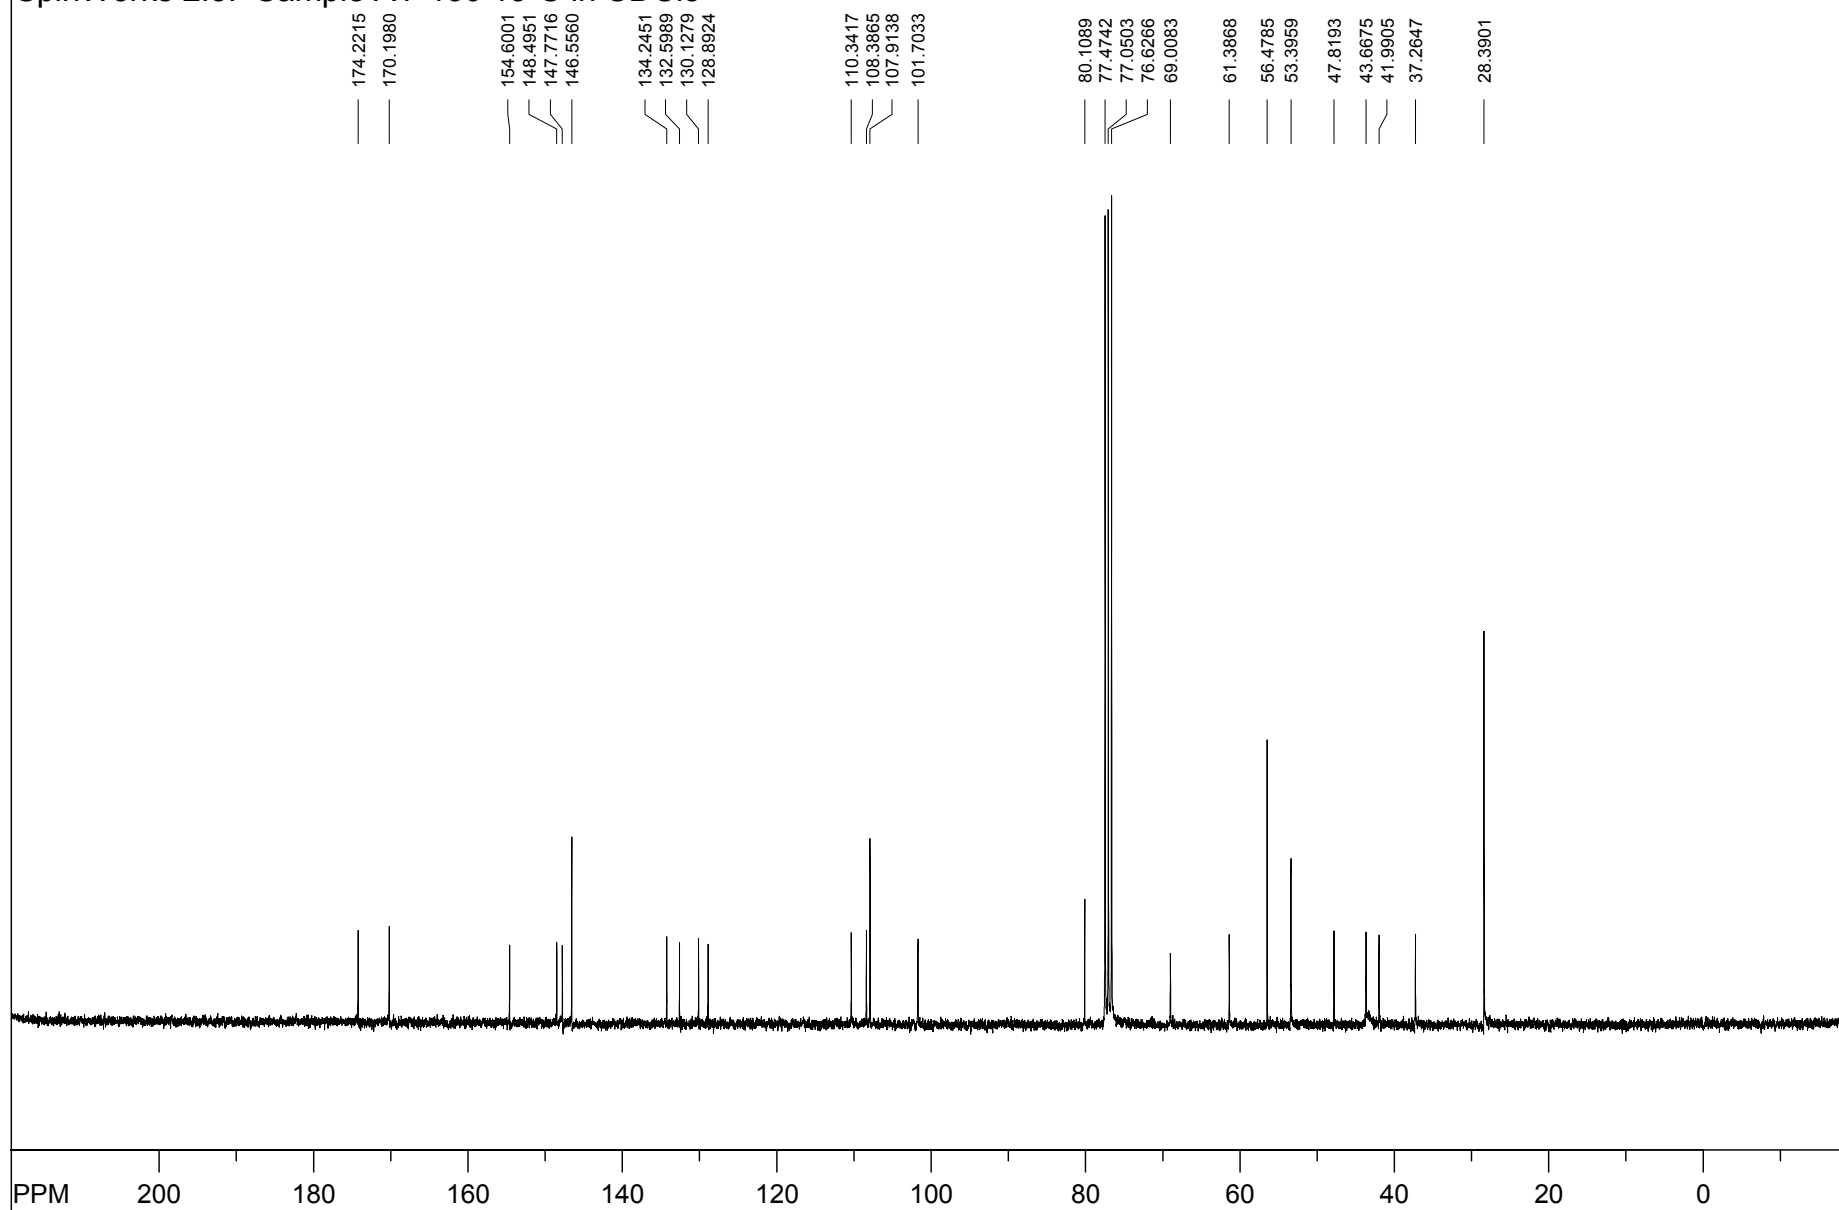

file: C:\Arun\NMR\bh-ay-130.zip 13C\bh-ay-130\1\fid expt: &lt;zgpg30&gt;

transmitter freq.: 75.475295 MHz

time domain size: 65536 points

width: 17985.61 Hz = 238.297995 ppm = 0.274439 Hz/pt

number of scans: 1024

freq. of 0 ppm: 75.467749 MHz

processed size: 32768 complex points

LB: 0.300 GB: 0.0000

Hz/cm: 719.353 ppm/cm: 9.53097

SpinWorks 2.5: Sample Ay-132 13-C in CDCl3

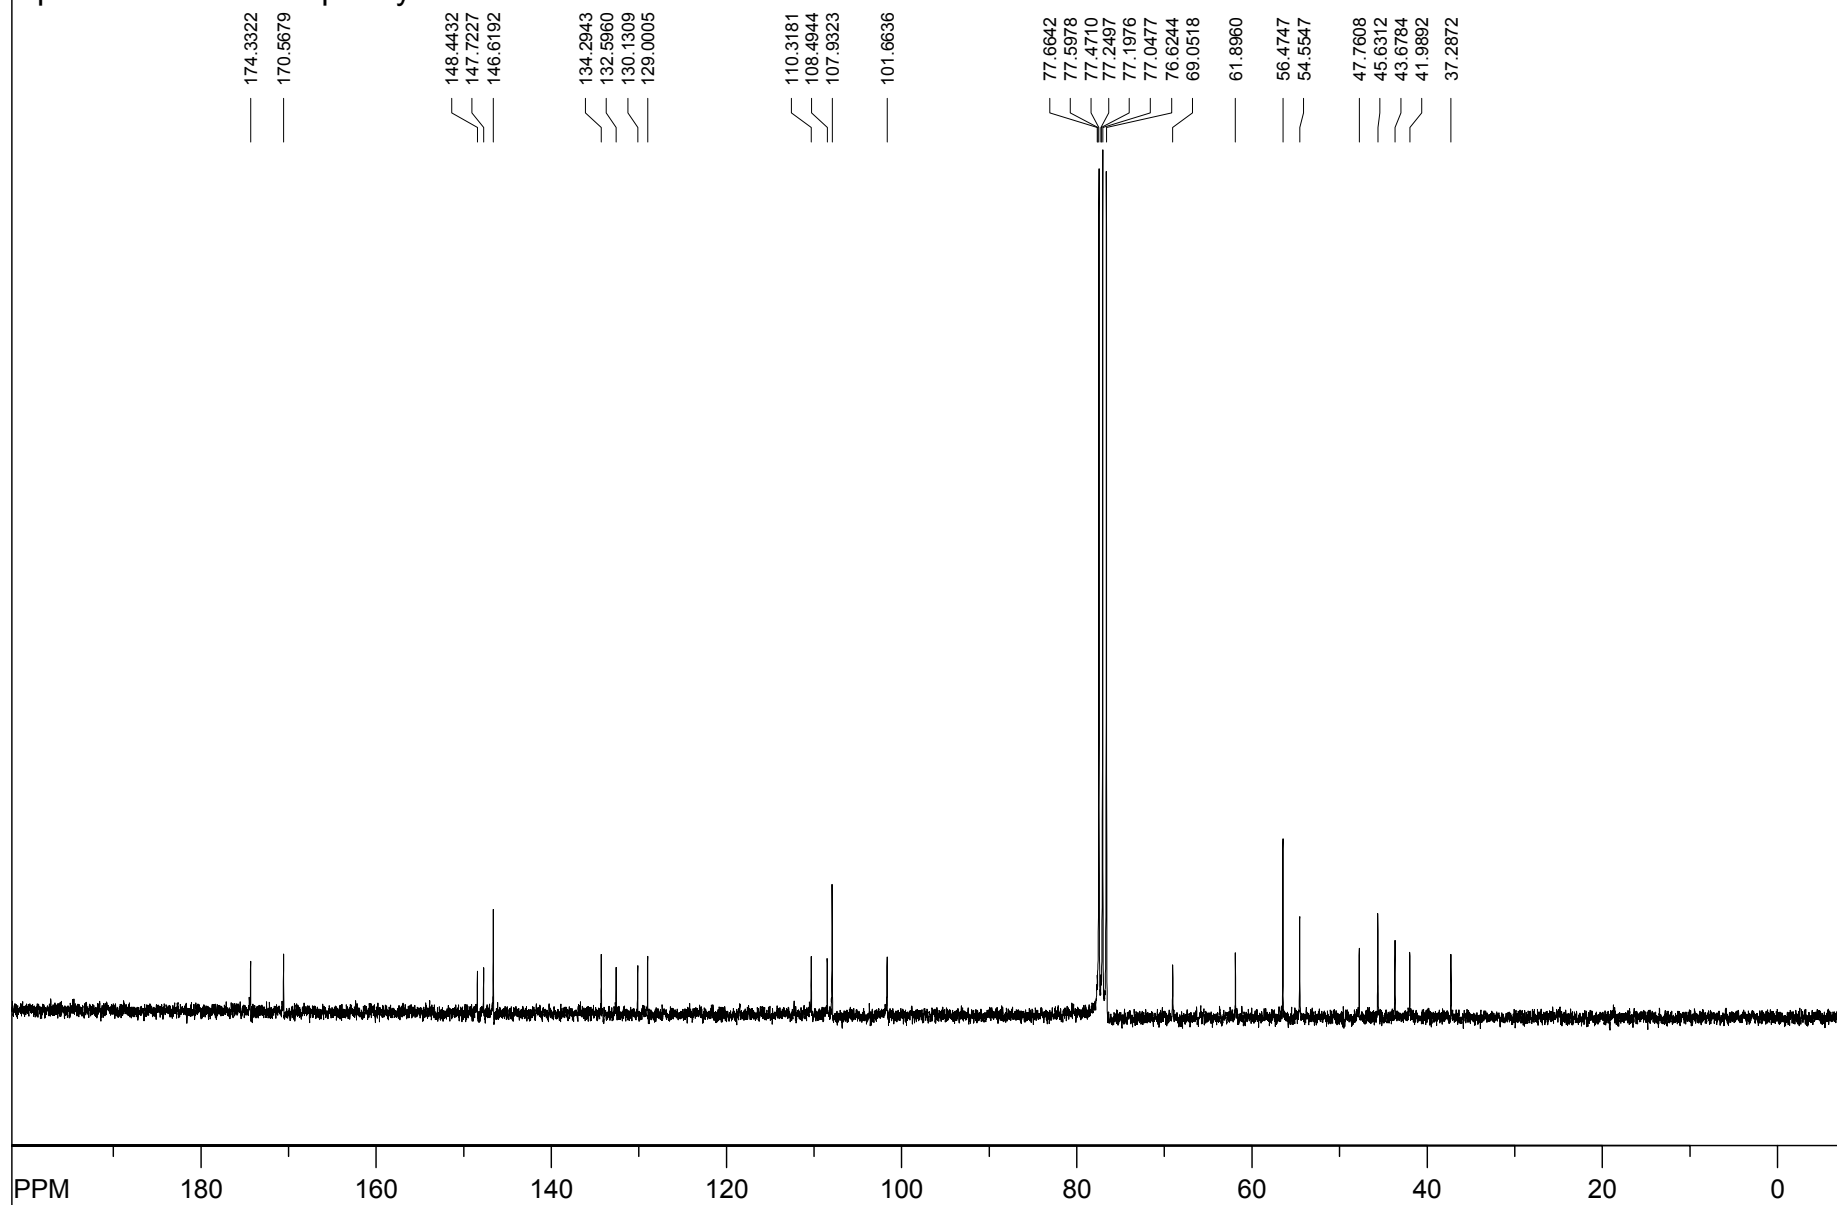

file: C:\Arun\NMR\bh-ay-132.zip 13C\bh-ay-132\1\fid exp: <zpgg30>  
 transmitter freq.: 75.475295 MHz  
 time domain size: 65536 points  
 width: 17985.61 Hz = 238.297995 ppm = 0.274439 Hz/pt  
 number of scans: 1024

freq. of 0 ppm: 75.467749 MHz  
 processed size: 32768 complex points  
 LB: 0.300 GB: 0.0000  
 Hz/cm: 632.243 ppm/cm: 8.37683

## SpinWorks 2.5: Sample AY-134 13-C nmr in CDCl3

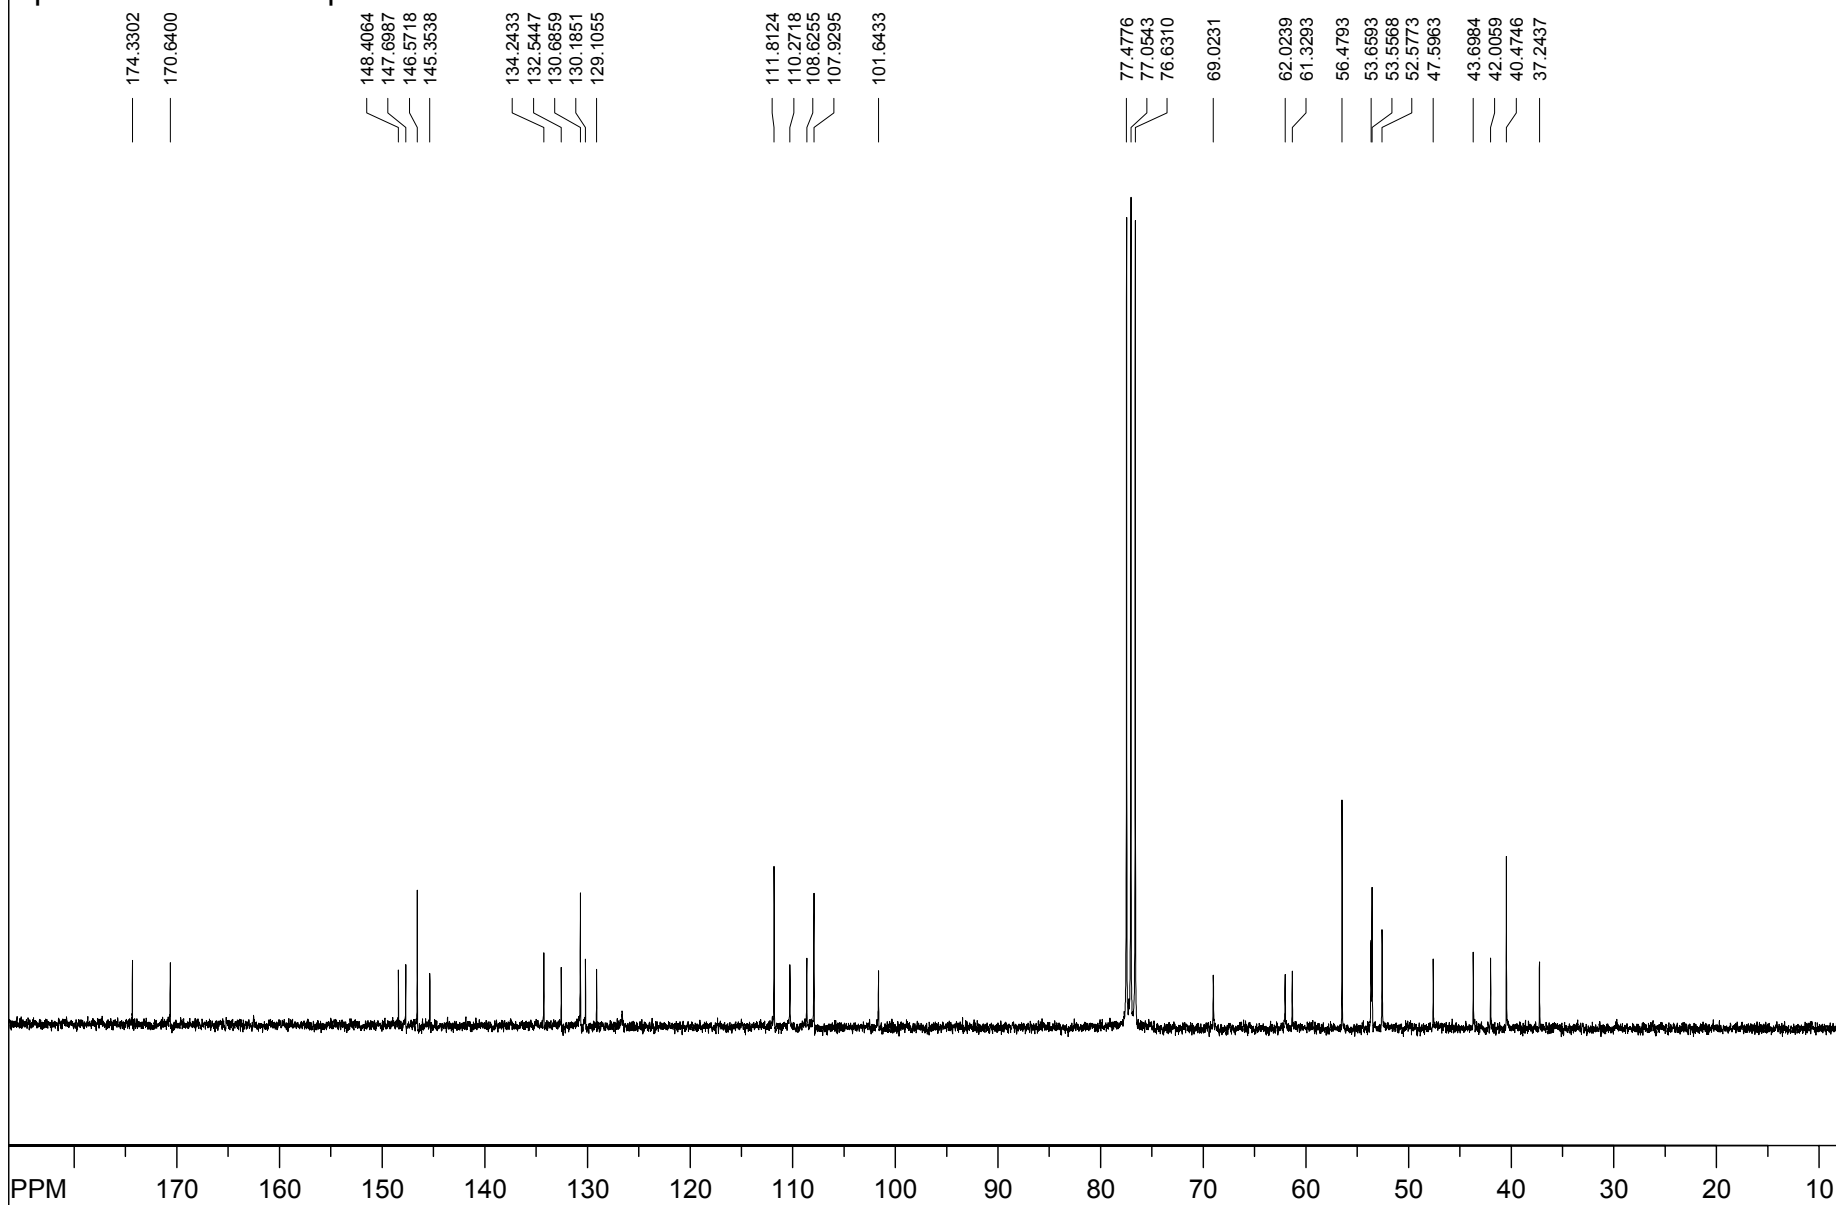

file: C:\Arun\NMR\bh-ay-134.zip 13C\bh-ay-134\1\fid exp: <zgpg30>

transmitter freq.: 75.475295 MHz

time domain size: 65536 points

width: 17985.61 Hz = 238.297995 ppm = 0.274439 Hz/pt

number of scans: 1024

freq. of 0 ppm: 75.467749 MHz

processed size: 32768 complex points

LB: 0.000 GB: 0.0000

Hz/cm: 539.514 ppm/cm: 7.14823

SpinWorks 2.5: Sample AY-136A 13-C nmr in CDCl3

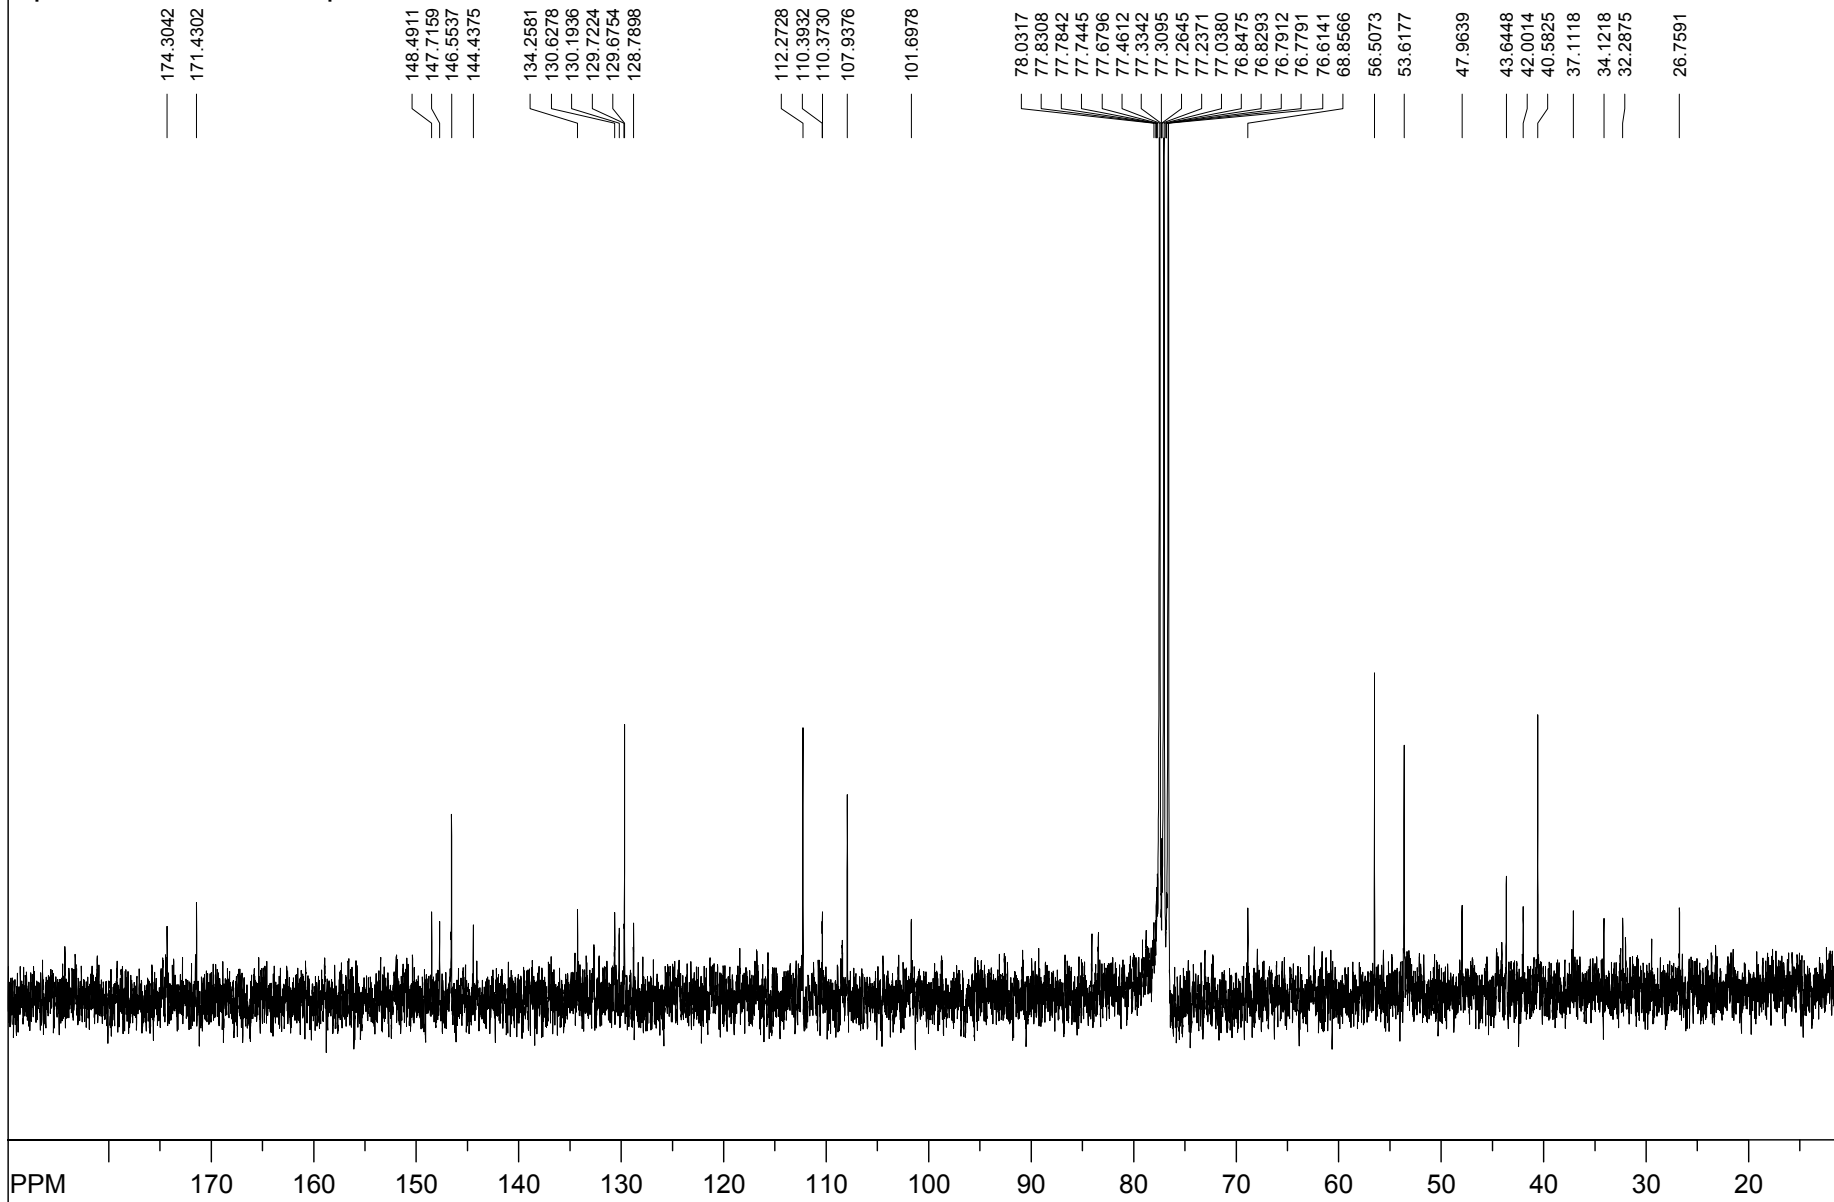

file: C:\Arun\NMR\bh-ay-136a\bh-ay-136a\1\fid exp: <zpgg30>  
transmitter freq.: 75.475295 MHz  
time domain size: 65536 points  
width: 17985.61 Hz = 238.297995 ppm = 0.274439 Hz/pt  
number of scans: 1024

freq. of 0 ppm: 75.467749 MHz  
processed size: 32768 complex points  
LB: 0.000 GB: 0.0000  
Hz/cm: 539.514 ppm/cm: 7.14823



SpinWorks 2.5: Sample AY-138 13-C nmr in CDCl3

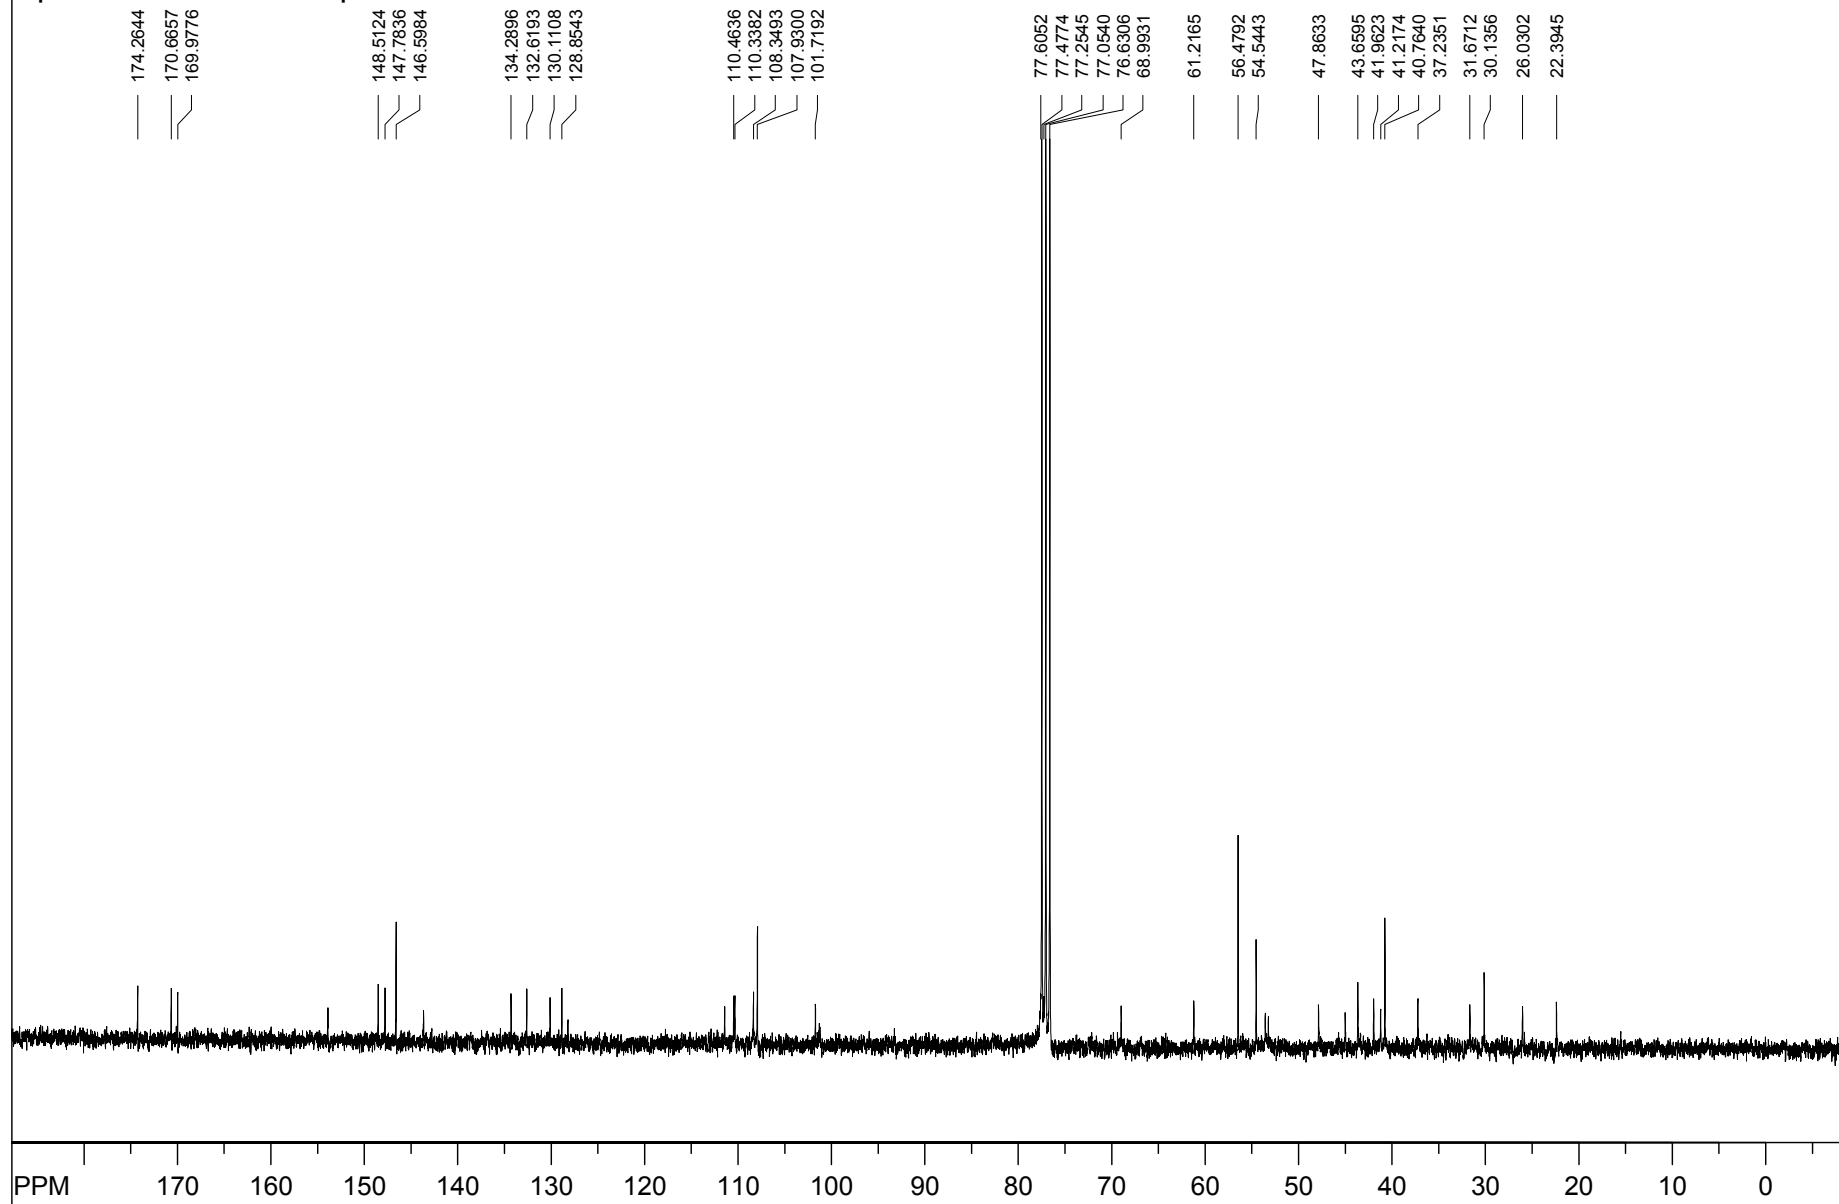

file: C:\Arun\NMR\bh-ay-138-13c\bh-ay-138-13c\1\fid expt: <zpgg30>  
 transmitter freq.: 75.475295 MHz  
 time domain size: 65536 points  
 width: 17985.61 Hz = 238.297995 ppm = 0.274439 Hz/pt  
 number of scans: 1024

freq. of 0 ppm: 75.467749 MHz  
 processed size: 32768 complex points  
 LB: 1.000 GB: 0.0000  
 Hz/cm: 592.728 ppm/cm: 7.85327
